# Supplementary material for: BES1 Functions as the Co-regulator of D53-like SMXLs to Inhibit BRC1 Expression in Strigolactone-Regulated Shoot Branching in Arabidopsis
Source: PubMed Central journal article supplement — Plant Commun. 2019 Dec 12;1(3):100014. doi: 10.1016/j.xplc.2019.100014 (PMC7748003; doi:10.1016/j.xplc.2019.100014), 2019-12-12
Supplement: mmc1.pdf [file mmc1.pdf]

**Plant Communications, Volume 1**

**Supplemental Information**

**BES1 Functions as the Co-regulator of D53-like SMXLs to Inhibit *BRC1* Expression in Strigolactone-Regulated Shoot Branching in *Arabidopsis***

**Jie Hu, Yuanyuan Ji, Xiaotong Hu, Shiyong Sun, and Xuelu Wang**

## Supplemental Figures and Tables

### **BES1 functions as co-regulator of D53-like SMXLs to inhibit *BRC1* expression in strigolactone-regulated shoot branching in *Arabidopsis***

Jie Hu<sup>1</sup>, Yuanyuan Ji<sup>1,2</sup>, Xiaotong Hu<sup>1</sup>, Shiyong Sun<sup>1,\*</sup> and Xuelu Wang<sup>1,\*</sup>

<sup>1</sup> National Key Laboratory of Crop Genetic Improvement and Center of Integrative Biology, College of Life Science and Technology, Huazhong Agricultural University, Wuhan, 430070 China

<sup>2</sup> Department of Genetics, School of Life Sciences, Fudan University, Shanghai, 200438 China

\*Correspondence:

Xuelu Wang (Email: [xlwang@mail.hzau.edu.cn](mailto:xlwang@mail.hzau.edu.cn), Tel: 86-27-87287166, FAX: 86-27-87287366) or Shiyong Sun (Email: [sunshiyong@mail.hzau.edu.cn](mailto:sunshiyong@mail.hzau.edu.cn))

The supplemental file includes 10 Supplemental Figures and 7 Supplemental Tables.

## SUPPLEMENTAL FIGURES

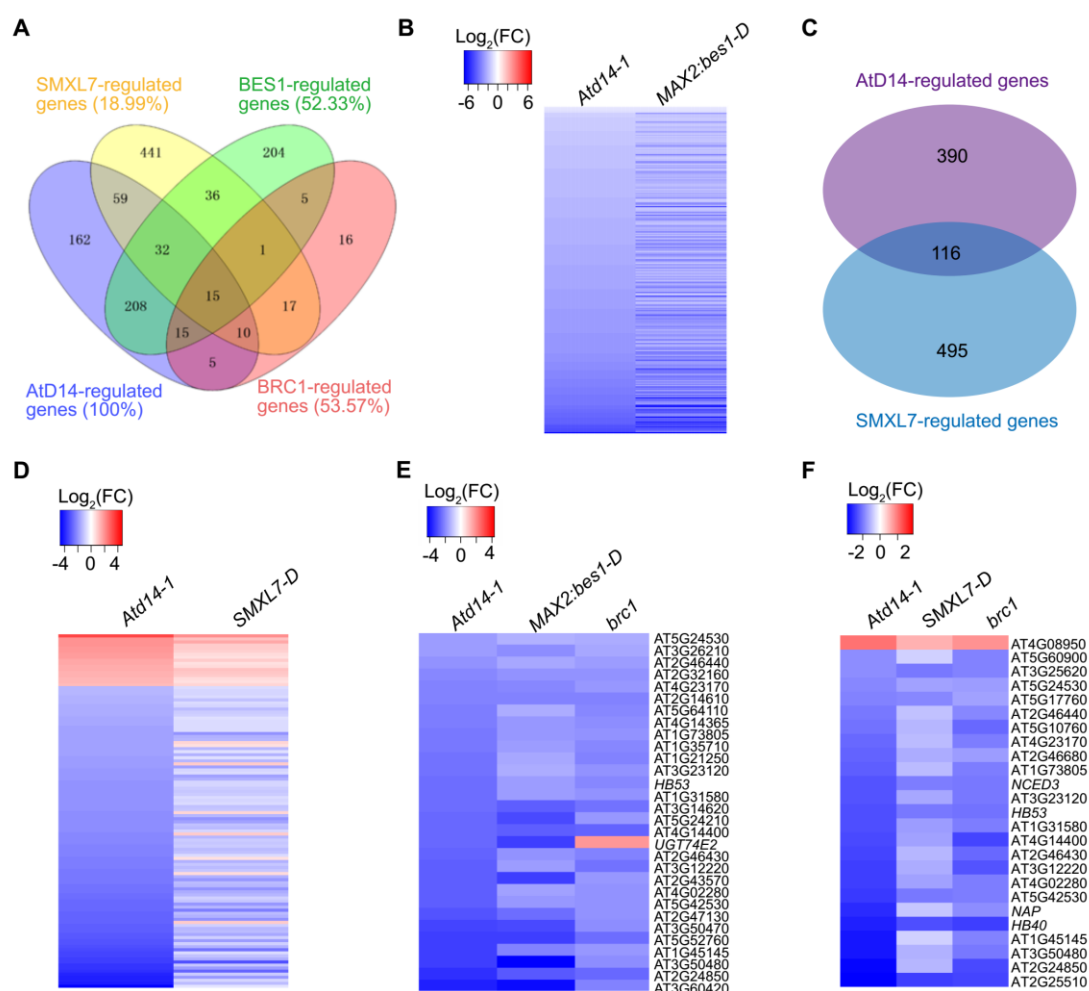

### Supplemental Figure 1. Differential expression genes in the *Atd14-1*, *SMXL7-D*, *MAX2:bes1-D* and *brc1* plants, Related to Figure 1.

(A) Percentage in bracket indicated the portion of differential expression genes in *Atd14-1* plants, co-regulated by SMXL7, BES1 and BRC1, respectively, Related to Figure 1.

(B) Heatmap displayed the expression profiles of genes co-regulated by BES1 and AtD14. The colored bars indicated the original fold change values transformed by log<sub>2</sub> regression.

(C) Venn diagram of the number of differentially expressed genes in buds of *Atd14-1*, and *SMXL7-D*, compared to Col-0.

(D) Heatmap showed the expression profiles of genes co-regulated by SMXL7 and AtD14. The colored bars indicated the original fold change values transformed by log<sub>2</sub> regression.

(E) Heatmap showed the expression profiles of genes co-regulated by AtD14, BES1 and BRC1. The colored bars indicated the original fold change values transformed by log<sub>2</sub> regression.

(F) Heatmap showed the expression profiles of genes co-regulated by AtD14, SMXL7 and BRC1. The colored bars indicated the original fold change values transformed by

log<sub>2</sub> regression.

Differentially expressed genes in buds were obtained from cuffdiff analysis with q value < 0.05.

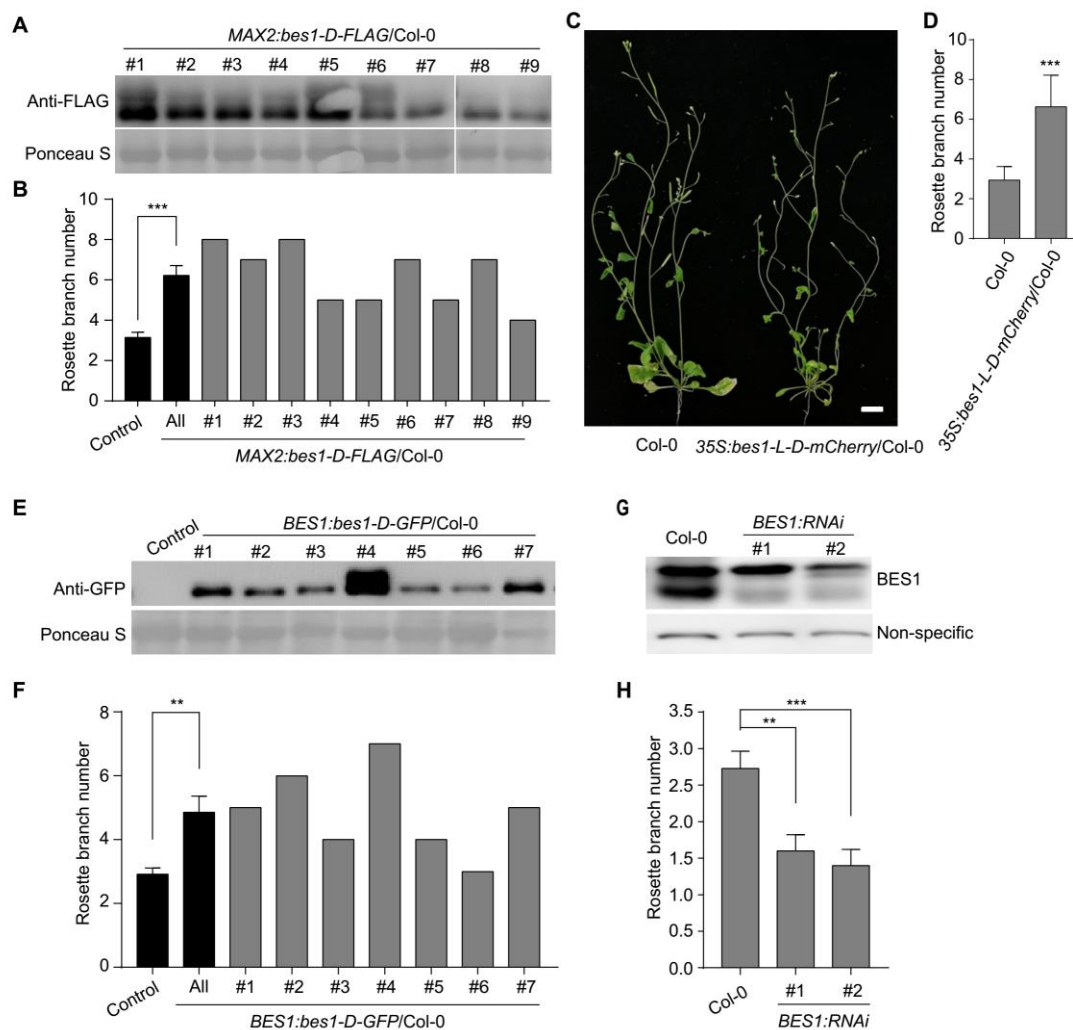

## Supplemental Figure 2. BES1 plays an important role in branching in *Arabidopsis*, Related to Figure 1.

(A) The protein level of BES1-FLAG in leaves of *MAX2:bes1-D-FLAG/Col-0* transgenic T1 lines was detected by anti-FLAG anti-body. Number #1-9 represented 9 independent T1 lines of *MAX2:bes1-D-FLAG/Col-0*.

(B) The corresponding rosette branch numbers of *MAX2:bes1-D-FLAG/Col-0* lines in (A) were collected after their completed life cycle. The control was transgenic plants expressed empty vector (sample number of the Control was 12), “All” means all of the T1 lines, number #1-9 were indicated in (A).

(C&D) The enhanced branching phenotype(C) and rosette branch numbers (D) of *35S:bes1-L-D-mCherry/Col-0* (sample number was 8) and *Col-0* (sample number was 16). Branch numbers were collected after they completed their life cycle.

(E) The protein level of BES1-GFP in *BES1:bes1-D-GFP/Col-0* transgenic T1 lines was detected by anti-GFP anti-body. Number #1-7 represented 7 independent T1 lines of *BES1:bes1-D-GFP/Col-0*.

(F) The corresponding rosette branch numbers of these *BES1:bes1-D-GFP/Col-0* lines in (E) were collected after their complete life cycle. The control was transgenic

plants expressed empty vector (the sample number was 8), “All” means all of the T1 lines, number #1-7 were indicated in (E)

**(G)** The protein level of endogenous BES1 detected by anti-BES1 anti-body of 2 independent *BESI-RNAi* lines.

**(H)** The corresponding rosette branch numbers of wild type Col-0 and these 2 independent *BESI-RNAi* lines 6 weeks after transplant on soil (sample numbers were 11, 10 and 10, respectively).

Data were means  $\pm$  SE. *P* values in (B, D, F, H) were determined by Student’s *t*-test; \*\*\* *P* < 0.001; \*\* *P* < 0.01.

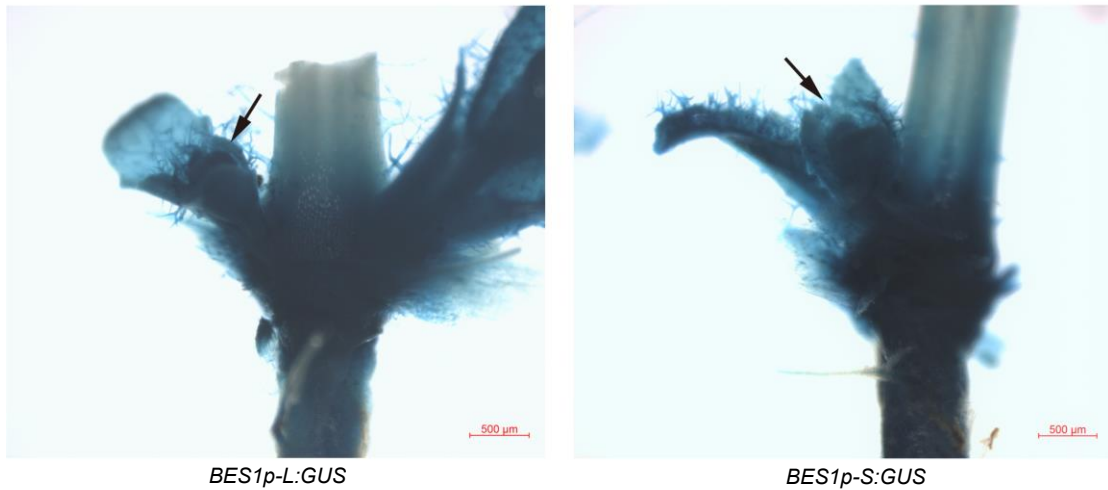

**Supplemental Figure 3. Both of the *BES1p-L:GUS* and *BES1p-S:GUS* are highly expressed in the axillary buds. Related to Figure 1.**

Buds wrapped by young leaves are less than 0.5 mm and pointed by black arrows. Scar bar represent 500 μm.

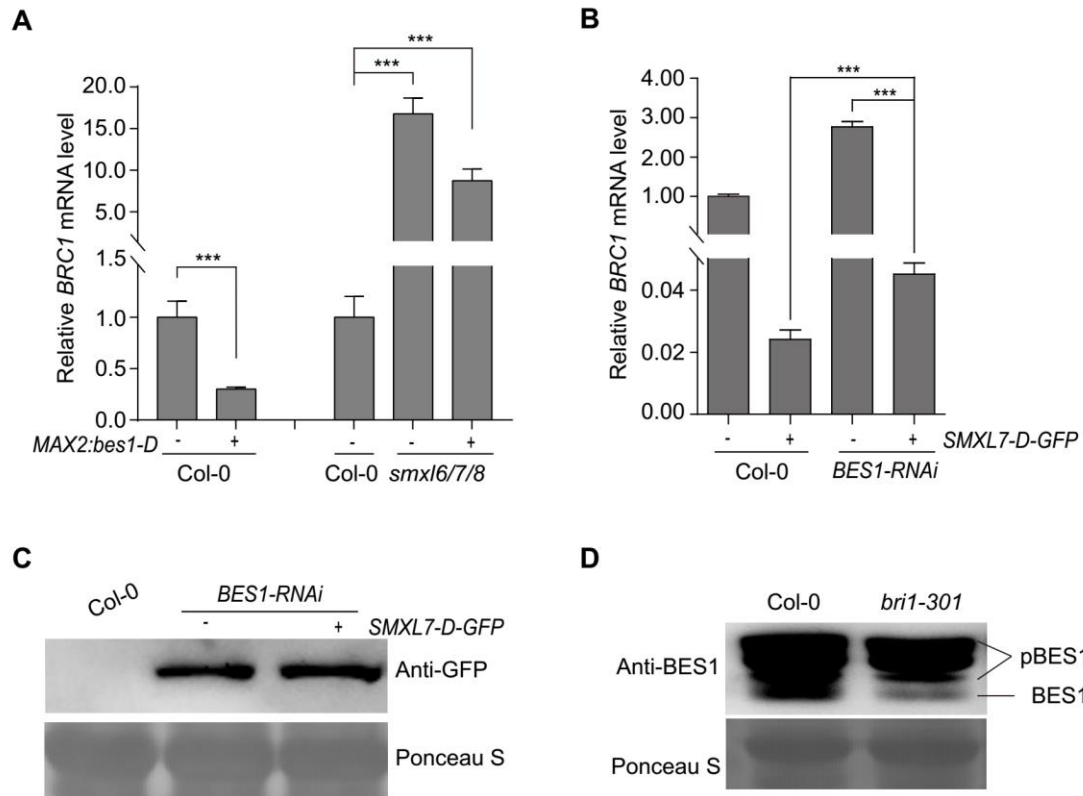

**Supplemental Figure 4. Identification of the related protein and expression levels in transgenic plants, Related to Figure 1, 3 and 4.**

(A) The transcription level of *BRC1* in *MAX2:bes1-D-FLAG* in Col-0 and *smxl6/7/8* background, and Col-0, *smxl6/7/8* lines, respectively.

(B) The transcription level of *BRC1* in *SMXL7-D-GFP/Col-0* and *SMXL7-D-GFP/BES1-RNAi* background, Col-0 and *BES1-RNAi* lines.

(C) Immunoblotting revealed *SMXL7-GFP* levels was similar in *SMXL7-D-GFP/Col-0* and *SMXL7-D-GFP/BES1-RNAi* transgenic lines using anti-GFP antibody. Ponceau S staining showed that equivalent amounts of loaded proteins were analyzed.

(D) Immunoblotting revealed the phosphorylated status of *BES1* in Col-0 and *bri1-301* seedlings by endogenous anti-BES1 antibody. Ponceau S staining showed that equivalent amounts of loaded proteins were analyzed.

Data were means  $\pm$  SD (n = 3). *P* values in (A and B) were determined by Student's *t*-test; \*\*\* *P* < 0.001.



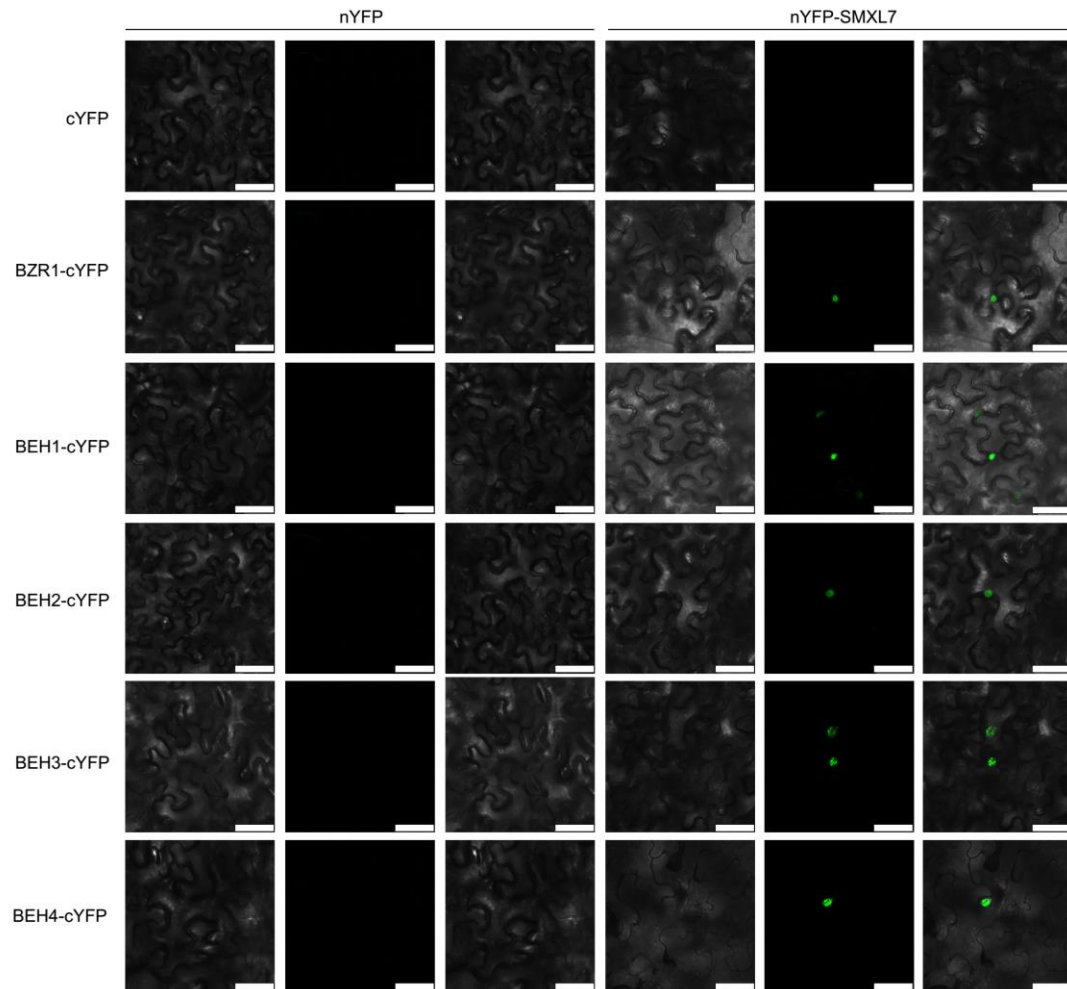

**Supplemental Figure 5. SMXL7 interacts with the homologs of BES1, Related to Figure 2.**

In bimolecular fluorescence complementation assays, SMXL7 interacted with the homologs of BES1. nYFP was fused to the N-terminus of SMXL7, and cYFP was linked to the C-terminus of BES1 homologs, including BZR1, BEH1, BEH2, BEH3, and BEH4, which were transiently co-expressed with nYFP-SMXL7 in *N. benthamiana* leaves. Scale bars represented 50  $\mu$ m.

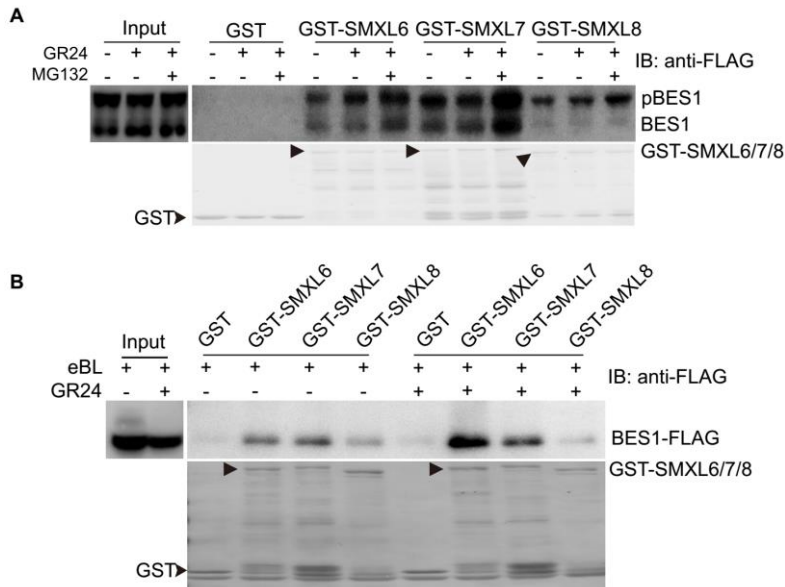

**Supplemental Figure 6. BRs and SLs have no effect on the interaction between BES1 and SMXL7, Related to Figure 2.**

(A) The interaction between BES1 and D53-like SMXLs was independent of GR24 treatment. 5  $\mu$ M GR24 and 50  $\mu$ M MG132 were added in the incubation of GST recombinant proteins and protein extraction of *35S:BES1-FLAG/Col-0* plants.

(B) The interaction between BES1 and D53-like SMXLs was independent of eBL, and eBL plus GR24 treatment. The semi-*in vivo* pull-down assay used GST recombinant proteins, and protein extraction was from seedlings of *35S:BES1-FLAG/Col-0* plants. 5  $\mu$ M eBL and 5  $\mu$ M eBL plus 5  $\mu$ M GR24 treatment for 3 hrs were performed on the seedling of *35S:BES1-FLAG/Col-0* plants before protein extraction and during the incubation of GST recombinant proteins and protein extraction of *35S:BES1-FLAG/Col-0* plants.

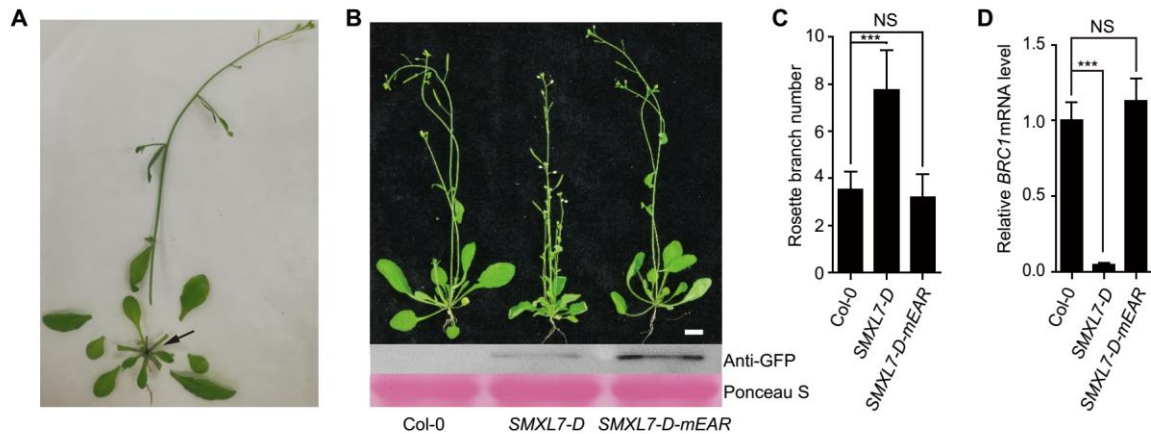

**Supplemental Figure 7. The EAR motif of SMXLs is required to inhibit *BRC1* expression. Related to Figure 3.**

(A) the shoot-root junction region of plants contained rosette buds without rosette leaves and large bud leaves used in ChIP assays (Black arrow pointed).

(B&C) Phenotypes and quantification of rosette branch number of Col-0, *SMXL7-D* and *SMXL7-D-mEAR* transgenic lines. bar = 1cm, (Col-0 (n = 15), *SMXL7-D* (n = 19) and *SMXL7-D-mEAR* (n = 26)).

(D) Relative expression levels of *BRC1* in Col-0, *SMXL7-D* and *SMXL7-D-mEAR* were determined by qRT-PCR.

Data were means  $\pm$  SE in (C); data were means  $\pm$  SD (n = 3) in (D). *P* values in (C and D) were determined by Student's *t*-test; \*\*\* *P* < 0.001; non-significant (NS), *P* > 0.05.

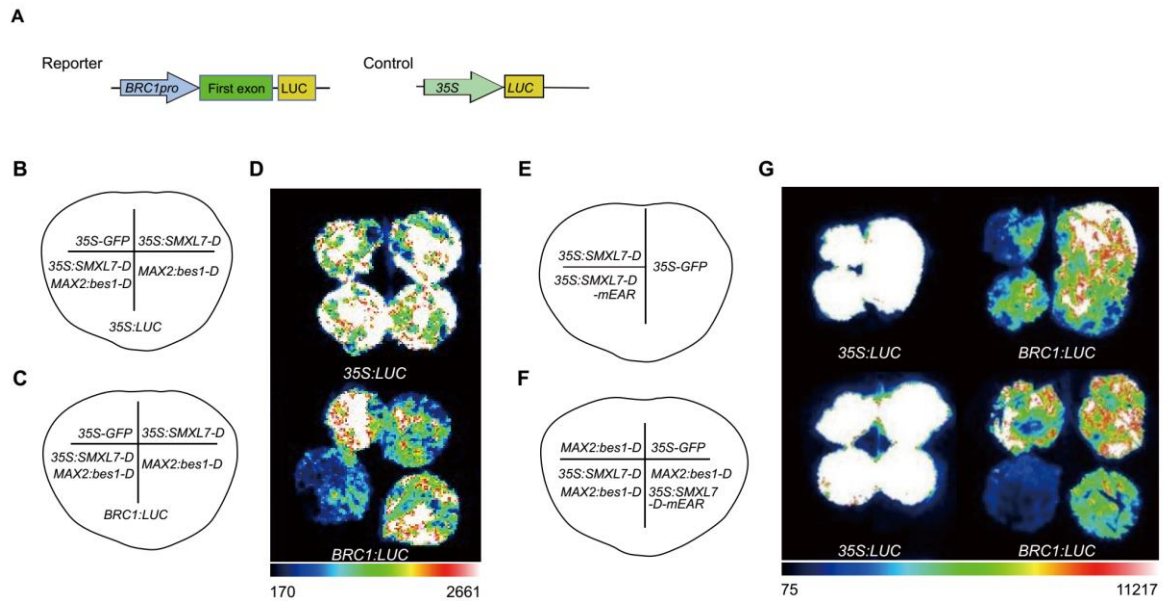

**Supplemental Figure 8. The D53-like SMXLs and BES1 depend on each other to inhibit *BRC1* expression. Related to Figure 3.**

**(A)** Schematic diagrams of the luciferase and control reporter in below transient expression assays.

**(B&C&D)** The LUC reporter system indicated *BRC1* was corporately inhibited by SMXL7 and BES1. Schematic representation in (B&C) showed the combinations of reporters and effectors in the corresponding position.

**(E&F&G)** The LUC reporter system indicated the EAR motif of SMXL7 was essential for inhibition of the luciferase activity of *BRC1:LUC* by the SMXL7–BES1 complex. Schematic representation in (E&F) showed the combinations of reporters, and effectors in the corresponding position.

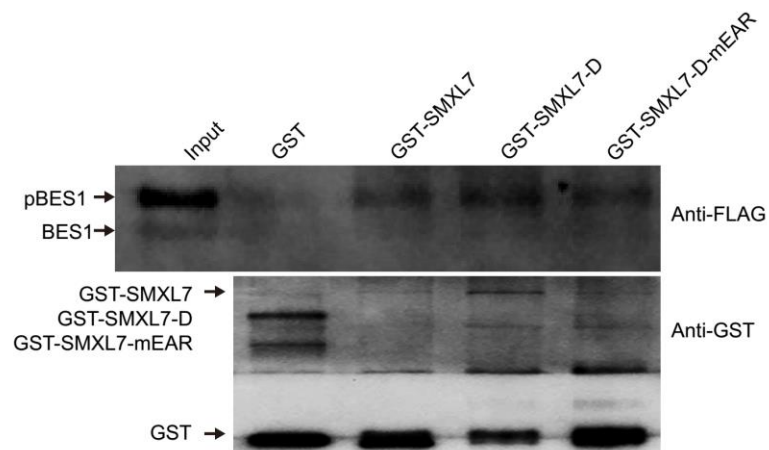

**Supplemental Figure 9. BES1 interacts with SMXL7-D and SMXL7-D-mEAR, Related to Figure 3.**

Semi-in vivo pull-down assay used glutathione-S-transferase (GST), GST-SMXL7, GST-SMXL7-D, and GST-SMXL7-D-mEAR recombinant proteins, and plant protein was extracted from *35S:BES1-FLAG* plants.

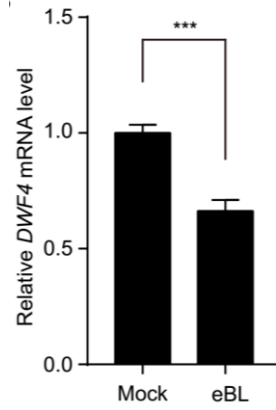

**Supplemental Figure 10. Related to Figure 4. The transcription level of *DWF4* in buds of Col-0 under mock and 5  $\mu$ M eBL treatments for 3 hrs. Data were means  $\pm$  SD (n = 3). *P* values were determined by Student's *t*-test; \*\*\* *P* < 0.001.**

**Supplemental Table 1. Differential-expressed genes regulated by AtD14**

| Up-regulated genes in <i>Atd14-1</i><br>(VS Col-0) | Down-regulated genes in <i>Atd14-1</i> (VS Col-0) |           |           |           |           |
|----------------------------------------------------|---------------------------------------------------|-----------|-----------|-----------|-----------|
| AT1G57750                                          | AT4G33540                                         | AT5G13220 | AT2G29420 | AT5G48430 | AT3G46280 |
| AT5G37940                                          | AT3G15950                                         | AT5G19230 | AT4G36990 | AT3G12220 | AT2G34500 |
| AT1G31690                                          | AT3G23570                                         | AT2G33380 | AT4G32480 | AT4G23230 | AT5G38200 |
| AT4G17860                                          | AT5G55120                                         | AT5G50200 | AT2G41231 | AT5G60270 | AT3G59220 |
| AT4G27570                                          | AT1G60140                                         | AT4G33050 | AT2G43620 | AT5G45380 | AT2G15490 |
| AT4G04840                                          | AT4G27560                                         | AT2G02010 | AT1G15520 | AT2G23680 | AT5G13370 |
| AT1G05540                                          | AT1G70530                                         | AT2G39710 | AT1G58390 | AT3G54420 | AT3G48520 |
| AT1G68600                                          | AT1G68670                                         | AT2G37040 | AT5G42530 | AT1G79410 | AT5G52050 |
| AT4G04955                                          | AT2G34660                                         | AT5G42830 | AT3G47340 | AT5G07010 | AT4G15610 |
| AT1G06350                                          | ATMG00020                                         | AT5G12170 | AT5G63790 | AT5G23660 | AT1G43160 |
| AT5G60490                                          | AT1G69870                                         | AT1G09970 | AT1G35910 | AT5G06860 | AT1G01680 |
| AT4G08950                                          | AT4G22505                                         | AT4G15120 | AT5G26340 | AT3G49780 | AT1G05800 |
| AT1G29660                                          | AT3G06500                                         | AT4G21380 | AT3G05660 | AT3G25730 | AT1G07900 |
| AT5G50790                                          | AT4G21410                                         | AT4G08870 | AT1G21120 | AT2G44790 | AT1G13540 |
| AT1G55330                                          | AT2G13790                                         | AT5G64110 | AT5G08790 | AT4G02280 | AT1G18980 |
| AT3G59010                                          | AT2G36320                                         | AT5G38940 | AT3G48360 | AT2G39980 | AT1G28180 |
| AT3G19680                                          | AT5G55860                                         | AT2G47000 | AT3G24420 | AT3G57260 | AT1G33960 |
| AT1G43790                                          | AT1G58360                                         | AT2G46440 | AT2G26560 | AT2G30140 | AT1G62420 |
| AT1G74670                                          | AT1G17420                                         | AT2G05380 | AT4G26120 | AT5G52760 | AT1G70130 |
| AT2G40460                                          | AT5G19120                                         | AT5G22270 | AT5G17860 | AT4G18170 | AT1G73965 |
| AT1G06360                                          | AT5G13750                                         | AT1G13990 | AT5G49520 | AT1G17170 | AT2G14610 |
| AT2G42990                                          | AT5G36160                                         | AT2G47800 | AT4G19460 | AT3G16530 | AT2G31083 |
| AT3G58120                                          | AT5G51830                                         | AT3G21670 | AT4G14400 | AT1G17180 | AT2G42430 |
| AT5G44680                                          | AT2G41090                                         | AT3G26210 | AT2G38530 | AT1G52890 | AT2G44810 |
| AT1G63710                                          | AT1G01720                                         | AT1G76680 | AT1G21310 | AT2G25510 | AT2G47770 |
| AT5G51890                                          | AT3G05650                                         | AT2G27310 | AT5G16970 | AT1G66480 | AT3G02240 |
| AT1G22160                                          | AT1G54010                                         | AT3G25780 | AT5G35935 | AT5G48657 | AT3G11980 |
| AT5G44020                                          | AT2G23200                                         | AT1G61820 | AT2G36080 | AT1G02920 | AT3G46650 |
| AT4G39800                                          | AT1G49750                                         | AT4G23170 | AT1G70140 | AT1G02930 | AT3G49845 |
| AT1G78020                                          | AT4G15760                                         | AT2G27500 | AT2G43570 | AT1G66760 | AT4G04510 |
| AT1G22530                                          | AT1G72940                                         | AT2G30400 | AT1G01560 | AT3G53480 | AT4G04540 |
| AT1G01600                                          | AT3G23030                                         | AT1G58340 | AT5G36220 | AT1G51800 | AT4G13420 |
| AT1G80280                                          | AT2G21690                                         | AT2G38860 | AT4G23600 | AT3G13790 | AT4G22070 |
| AT5G44130                                          | AT2G22680                                         | AT1G17830 | AT5G49700 | AT5G13330 | AT4G27140 |
| AT4G18970                                          | AT5G57660                                         | AT1G69730 | AT3G22160 | AT3G50470 | AT5G07310 |
| AT1G20850                                          | AT2G29450                                         | AT2G36800 | AT3G16330 | AT1G77450 | AT5G10625 |
| AT2G01420                                          | AT4G34138                                         | AT4G14365 | AT2G28400 | AT4G21120 | AT5G12030 |
| AT1G01120                                          | AT1G76520                                         | AT3G27025 | AT1G12200 | AT4G36740 | AT5G16920 |
| AT2G04070                                          | AT2G46270                                         | AT1G76590 | AT3G13650 | AT2G39030 | AT5G52400 |
| AT3G16680                                          | AT5G53420                                         | AT3G47780 | AT5G15970 | AT4G01870 | AT5G64890 |
| AT4G04000                                          | AT1G32640                                         | AT5G24290 | AT2G18050 | AT3G44860 | AT5G66780 |
| AT5G37970                                          | AT5G05460                                         | AT1G31580 | AT2G37760 | AT4G15530 | AT4G39950 |
|                                                    | AT4G17900                                         | AT5G20230 | AT3G04000 | AT3G14440 | AT5G52640 |
|                                                    | AT3G51450                                         | AT5G57480 | AT1G59740 | AT2G14560 | AT2G43510 |
|                                                    | AT2G31160                                         | AT5G35735 | AT3G55720 | AT2G45570 | AT2G41380 |
|                                                    | AT5G67420                                         | AT3G48990 | AT3G48080 | AT4G02520 | AT1G64950 |
|                                                    | AT1G80440                                         | AT1G72120 | AT1G05680 | AT3G55970 | AT4G31500 |
|                                                    | AT2G43520                                         | AT1G21250 | AT5G66650 | AT2G39200 | AT1G64900 |
|                                                    | AT1G25550                                         | AT2G44290 | AT5G47560 | AT3G17609 | AT5G22300 |
|                                                    | AT3G13110                                         | AT1G62940 | AT4G25410 | AT4G34710 | AT4G22530 |
|                                                    | AT4G37180                                         | AT4G35110 | AT4G08770 | AT1G02850 | AT1G02400 |
|                                                    | AT3G53260                                         | AT2G18660 | AT1G73480 | AT4G02380 | AT1G69490 |
|                                                    | AT1G08800                                         | AT3G25610 | AT1G75490 | AT3G12580 | AT3G19030 |
|                                                    | AT4G34000                                         | AT1G35710 | AT1G16850 | AT3G60420 | AT3G50480 |
|                                                    | AT3G13910                                         | AT2G46680 | AT5G05600 | AT2G29440 | AT3G50770 |
|                                                    | AT5G11260                                         | AT2G41510 | AT5G07440 | AT2G24850 | AT3G50970 |
|                                                    | AT1G17745                                         | AT5G03700 | AT5G14180 | AT2G15480 | AT5G15960 |
|                                                    | AT1G17380                                         | AT5G10760 | AT5G04340 | AT3G18550 | AT1G16260 |
|                                                    | AT4G36040                                         | AT4G37370 | AT1G66920 | AT1G74010 | AT3G44720 |
|                                                    | AT5G61010                                         | AT3G57240 | AT2G39210 | AT1G32960 | AT1G69850 |
|                                                    | AT2G26530                                         | AT4G13180 | AT5G25440 | AT3G63380 | AT3G28930 |
|                                                    | AT1G60730                                         | AT3G46660 | AT5G46050 | AT5G55050 | AT5G66700 |
|                                                    | AT1G59700                                         | AT5G60950 | AT1G49500 | AT1G55920 | AT5G60900 |
|                                                    | AT4G21400                                         | AT2G20670 | AT2G27690 | AT3G26830 | AT1G72900 |
|                                                    | AT5G19440                                         | AT5G49480 | AT1G34420 | AT5G49690 | AT1G56650 |
|                                                    | AT3G49120                                         | AT3G21230 | AT5G24210 | AT4G08555 | AT4G34135 |
|                                                    | AT3G51430                                         | AT5G14780 | AT5G61820 | AT1G76930 | AT2G46430 |
|                                                    | AT4G28490                                         | AT2G36950 | AT1G14870 | AT1G80820 | AT1G45145 |
|                                                    | AT4G17500                                         | AT2G27830 | AT5G11410 | AT3G15500 | AT5G25250 |
|                                                    | AT1G49050                                         | AT4G18360 | AT3G14620 | AT1G69930 | AT2G37770 |
|                                                    | AT5G54170                                         | AT2G32160 | AT1G10340 | AT4G22710 | AT2G29460 |
|                                                    | AT1G73500                                         | AT3G03990 | AT1G52200 | AT3G54150 | AT3G23250 |
|                                                    | AT5G54510                                         | AT2G15760 | AT3G23120 | AT3G44300 | AT3G49620 |
|                                                    | AT2G37180                                         | AT5G39050 | AT2G47130 | AT1G77760 |           |
|                                                    | AT1G50420                                         | AT4G38540 | AT5G39610 | AT1G02360 |           |
|                                                    | AT4G19700                                         | AT1G73805 | AT2G18690 | AT4G36850 |           |

**Supplemental Table 2. Differential-expressed genes regulated by BES1**

| Up-regulated genes in <i>MAX2:bes1-D</i> (VS Col-0) | Down-regulated genes in <i>MAX2:bes1-D</i> (VS Col-0) |           |           |           |           |           |           |
|-----------------------------------------------------|-------------------------------------------------------|-----------|-----------|-----------|-----------|-----------|-----------|
| AT1G19350                                           | AT1G20440                                             | AT5G52640 | AT1G08050 | AT2G36950 | AT2G47000 | AT4G25810 | AT3G60120 |
| AT2G41640                                           | AT4G16990                                             | AT1G31580 | AT4G18360 | AT5G10380 | AT4G25410 | AT1G72920 | AT4G06746 |
| AT4G25100                                           | AT2G44490                                             | AT4G37410 | AT1G18590 | AT5G26920 | AT4G30270 | AT4G34135 | AT4G08040 |
| AT5G42800                                           | AT2G26190                                             | AT3G16670 | AT3G16720 | AT5G01100 | AT1G76070 | AT2G41100 | AT4G11480 |
| AT1G67750                                           | AT3G49120                                             | AT5G53290 | AT1G56660 | AT1G63720 | AT2G41231 | AT3G15356 | AT4G12490 |
| AT4G00870                                           | AT2G39570                                             | AT5G56980 | AT3G25760 | AT5G05440 | AT2G36970 | AT3G52450 | AT4G12500 |
| AT4G34760                                           | AT2G29450                                             | AT3G13110 | AT1G34420 | AT5G49520 | AT2G39210 | AT1G55920 | AT4G13420 |
| AT2G16586                                           | AT5G04720                                             | AT5G46330 | AT2G30870 | AT5G11410 | AT5G65300 | AT5G35735 | AT4G16260 |
| AT3G07010                                           | AT3G03780                                             | AT4G02940 | AT3G10985 | AT4G08870 | AT1G61560 | AT2G45570 | AT4G21830 |
| AT4G02290                                           | AT1G69870                                             | AT3G23120 | AT2G46430 | AT2G43590 | AT1G25400 | AT1G14870 | AT4G22070 |
| AT4G00820                                           | AT1G01720                                             | AT1G26930 | AT1G21130 | AT4G18010 | AT2G36380 | AT3G13790 | AT4G27140 |
| AT4G20320                                           | AT5G27760                                             | AT3G57520 | AT5G20480 | AT5G49700 | AT1G31540 | AT5G13330 | AT4G31950 |
| AT2G03821                                           | AT3G50950                                             | AT1G17860 | AT3G30775 | AT4G20830 | AT5G05690 | AT5G05690 | AT4G37990 |
| AT4G22080                                           | AT5G03380                                             | AT1G72450 | AT1G76590 | AT2G39400 | AT5G23510 | AT5G24210 | AT5G05300 |
| AT5G58360                                           | AT5G22920                                             | AT2G46440 | AT1G45145 | AT1G66760 | AT4G39070 | AT1G65390 | AT5G07100 |
|                                                     | AT4G24160                                             | AT1G72680 | AT1G72520 | AT1G79410 | AT4G35770 | AT2G44790 | AT5G15130 |
|                                                     | AT5G24530                                             | AT5G42530 | AT5G47560 | AT5G14780 | AT5G54710 | AT3G60420 | AT5G17350 |
|                                                     | AT1G32700                                             | AT3G54640 | AT1G73480 | AT4G24040 | AT1G68620 | AT3G15500 | AT5G17390 |
|                                                     | AT3G16420                                             | AT4G17250 | AT3G22370 | AT5G49480 | AT2G32150 | AT3G50480 | AT5G22540 |
|                                                     | AT2G43520                                             | AT2G36080 | AT2G18193 | AT1G73500 | AT3G25780 | AT2G39200 | AT5G46295 |
|                                                     | AT3G57450                                             | AT4G29780 | AT4G34230 | AT2G36800 | AT5G26340 | AT1G66480 | AT5G64890 |
|                                                     | AT1G49050                                             | AT5G65380 | AT5G13200 | AT1G10370 | AT1G72930 | AT1G72730 | AT1G05010 |
|                                                     | AT3G15210                                             | AT2G31750 | AT4G01010 | AT1G77450 | AT4G35110 | AT5G49690 | AT1G61890 |
|                                                     | AT5G67300                                             | AT3G05660 | AT4G39950 | AT5G13220 | AT2G43510 | AT5G64120 | AT5G18130 |
|                                                     | AT4G28490                                             | AT1G21000 | AT2G32160 | AT3G61280 | AT1G76650 | AT3G55970 | AT3G10340 |
|                                                     | AT5G13750                                             | AT3G23030 | AT5G41740 | AT2G47130 | AT5G39610 | AT3G50970 | AT1G11580 |
|                                                     | AT3G13520                                             | AT3G62150 | AT5G14120 | AT5G46050 | AT3G63380 | AT3G59220 | AT4G19880 |
|                                                     | AT4G15490                                             | AT2G46600 | AT1G60730 | AT3G26210 | AT4G17500 | AT2G34500 | AT4G27300 |
|                                                     | AT5G64110                                             | AT4G02280 | AT2G40000 | AT3G23570 | AT1G15125 | AT4G21120 | AT1G72120 |
|                                                     | AT2G23810                                             | AT1G35710 | AT1G75750 | AT4G23600 | AT4G01750 | AT2G19800 | AT1G51760 |
|                                                     | AT1G54020                                             | AT5G05730 | AT1G19380 | AT1G72910 | AT5G16970 | AT5G20230 | AT1G21010 |
|                                                     | AT4G36648                                             | AT3G51600 | AT4G23170 | AT1G09970 | AT3G21230 | AT5G05600 | AT2G48020 |
|                                                     | AT2G43910                                             | AT2G24100 | AT1G06620 | AT2G35930 | AT3G17609 | AT5G04340 | AT3G18830 |
|                                                     | AT1G20510                                             | AT5G66700 | AT3G28930 | AT3G26220 | AT3G04210 | AT1G76930 | AT3G20660 |
|                                                     | AT5G06870                                             | AT1G70700 | AT5G25440 | AT2G37040 | AT1G02930 | AT4G15530 | AT5G39020 |
|                                                     | AT1G21250                                             | AT3G55980 | AT5G48540 | AT5G36220 | AT1G76680 | AT1G80820 | AT4G22530 |
|                                                     | AT1G54010                                             | AT1G57990 | AT3G21240 | AT3G46110 | AT1G70140 | AT2G37770 | AT4G38860 |
|                                                     | AT5G38940                                             | AT4G39940 | AT3G22060 | AT5G45340 | AT3G47340 | AT2G26560 | AT5G57785 |
|                                                     | AT3G45640                                             | AT1G75040 | AT1G74100 | AT2G22470 | AT1G62300 | AT4G02380 | AT1G61820 |
|                                                     | AT1G70530                                             | AT4G15760 | AT2G43620 | AT1G72940 | AT1G19180 | AT3G49620 | AT4G36670 |
|                                                     | AT3G50660                                             | AT5G52310 | AT1G68840 | AT3G16330 | AT5G22270 | AT4G02520 | AT1G37130 |
|                                                     | AT3G51450                                             | AT4G14365 | AT5G39050 | AT2G44080 | AT5G08790 | AT5G52050 | AT3G19030 |
|                                                     | AT3G05200                                             | AT3G56400 | AT2G16060 | AT1G75490 | AT1G28370 | AT3G01290 | AT4G13395 |
|                                                     | AT5G42650                                             | AT5G61600 | AT3G46660 | AT5G12170 | AT5G52760 | AT2G15480 | AT3G22160 |
|                                                     | AT1G28130                                             | AT5G44260 | AT3G54140 | AT2G18660 | AT2G02010 | AT3G26830 | AT4G36850 |
|                                                     | AT5G05140                                             | AT4G31500 | AT1G02400 | AT5G27420 | AT4G01870 | AT2G29460 | AT3G52400 |
|                                                     | AT1G03220                                             | AT3G47420 | AT5G59540 | AT2G37760 | AT4G18170 | AT3G23250 | AT1G15520 |
|                                                     | AT5G05460                                             | AT5G63160 | AT4G22690 | AT3G12580 | AT2G30140 | AT1G02920 | AT4G13180 |
|                                                     | AT1G13990                                             | AT1G17380 | AT5G61820 | AT3G13650 | AT5G15960 | AT3G16530 | AT1G72900 |
|                                                     | AT5G06320                                             | AT4G23270 | AT1G76520 | AT3G18550 | AT2G43570 | AT1G43160 | AT5G07010 |
|                                                     | AT1G11330                                             | AT5G17000 | AT1G71880 | AT5G46350 | AT5G13370 | AT1G05800 | AT1G17170 |
|                                                     | AT5G01210                                             | AT3G12220 | AT3G50760 | AT2G39980 | AT3G48650 | AT1G07160 | AT1G27020 |
|                                                     | AT1G68440                                             | AT1G12110 | AT4G36500 | AT1G76600 | AT1G02850 | AT1G07900 | AT5G55050 |
|                                                     | AT1G64950                                             | AT1G73805 | AT1G08930 | AT3G47780 | AT2G27690 | AT1G08090 | AT1G05680 |
|                                                     | AT4G27830                                             | AT4G17900 | AT3G25610 | AT5G19240 | AT3G50470 | AT1G13480 | AT1G18570 |
|                                                     | AT3G59140                                             | AT4G21850 | AT1G23850 | AT2G29420 | AT3G22910 | AT1G13520 | AT2G25735 |
|                                                     | AT2G30600                                             | AT2G46650 | AT5G60950 | AT1G78000 | AT3G54420 | AT1G18980 | AT2G39530 |
|                                                     | AT3G13080                                             | AT4G17490 | AT2G24600 | AT5G41750 | AT3G24420 | AT1G20310 | AT2G41800 |
|                                                     | AT1G13260                                             | AT3G53260 | AT4G06744 | AT2G15042 | AT4G38540 | AT1G26390 | AT3G04420 |
|                                                     | AT1G22890                                             | AT5G56870 | AT2G22770 | AT2G27500 | AT5G60270 | AT1G28180 | AT3G19615 |
|                                                     | AT1G17420                                             | AT3G28220 | AT2G30400 | AT5G44380 | AT4G33050 | AT1G30720 | AT3G43250 |
|                                                     | AT4G17230                                             | AT5G51830 | AT4G32870 | AT3G25770 | AT2G23680 | AT1G32350 | AT3G48850 |
|                                                     | AT5G17380                                             | AT2G27830 | AT1G52890 | AT5G07440 | AT5G17860 | AT1G36622 | AT3G52748 |
|                                                     | AT1G01470                                             | AT4G36990 | AT1G18390 | AT2G26530 | AT5G45380 | AT1G51890 | AT1G21400 |
|                                                     | AT5G19440                                             | AT5G49730 | AT5G63790 | AT3G13950 | AT5G40780 | AT1G57650 | AT3G21690 |
|                                                     | AT4G31800                                             | AT5G53550 | AT3G48990 | AT3G01970 | AT5G50200 | AT1G79680 | AT4G37370 |
|                                                     | AT4G21380                                             | AT1G51680 | AT1G16660 | AT4G14400 | AT1G24147 | AT2G02930 | AT5G47220 |
|                                                     | AT2G40140                                             | AT4G37610 | AT1G59740 | AT5G52750 | AT1G66160 | AT2G14610 | AT5G19230 |
|                                                     | AT5G54170                                             | AT2G25450 | AT2G43820 | AT3G04720 | AT2G27310 | AT2G15390 | AT2G36690 |
|                                                     | AT5G54500                                             | AT1G44350 | AT2G30250 | AT2G15760 | AT1G77760 | AT2G17740 |           |
|                                                     | AT3G49110                                             | AT5G20250 | AT3G04000 | AT2G24850 | AT5G06860 | AT2G32660 |           |
|                                                     | AT4G30530                                             | AT1G78850 | AT4G19810 | AT2G38470 | AT3G14620 | AT2G35980 |           |



**Supplemental Table 3. Differential-expressed genes co-regulated by AtD14-BES1**

| Up-regulated genes | Down-regulated genes |           |           |           |
|--------------------|----------------------|-----------|-----------|-----------|
| N/A                | AT3G23570            | AT2G22770 | AT4G23600 | AT1G80820 |
|                    | AT1G70530            | AT3G25770 | AT5G49700 | AT3G15500 |
|                    | AT1G69870            | AT5G13220 | AT3G22160 | AT1G77760 |
|                    | AT1G17420            | AT5G19230 | AT3G16330 | AT4G36850 |
|                    | AT5G13750            | AT5G50200 | AT3G13650 | AT2G37770 |
|                    | AT5G51830            | AT4G33050 | AT2G37760 | AT2G29460 |
|                    | AT1G01720            | AT2G02010 | AT3G04000 | AT3G23250 |
|                    | AT1G54010            | AT2G37040 | AT1G59740 | AT3G49620 |
|                    | AT4G15760            | AT5G12170 | AT1G05680 | AT3G50970 |
|                    | AT1G72940            | AT1G09970 | AT5G47560 | AT5G15960 |
|                    | AT3G23030            | AT4G21380 | AT4G25410 | AT2G34500 |
|                    | AT3G21690            | AT4G08870 | AT1G73480 | AT3G59220 |
|                    | AT2G29450            | AT5G64110 | AT1G75490 | AT5G13370 |
|                    | AT1G76520            | AT5G38940 | AT5G05600 | AT5G52050 |
|                    | AT5G05460            | AT2G47000 | AT5G07440 | AT1G43160 |
|                    | AT4G17900            | AT2G46440 | AT5G04340 | AT1G05800 |
|                    | AT3G51450            | AT5G22270 | AT2G39210 | AT1G07900 |
|                    | AT2G43520            | AT1G13990 | AT5G25440 | AT1G18980 |
|                    | AT3G13110            | AT3G26210 | AT5G46050 | AT1G28180 |
|                    | AT3G53260            | AT1G76680 | AT2G27690 | AT2G14610 |
|                    | AT1G17380            | AT2G27310 | AT1G34420 | AT4G13420 |
|                    | AT2G26530            | AT3G25780 | AT5G24210 | AT4G22070 |
|                    | AT1G60730            | AT1G61820 | AT5G61820 | AT4G27140 |
|                    | AT5G19440            | AT4G23170 | AT1G14870 | AT5G64890 |
|                    | AT3G49120            | AT2G27500 | AT5G11410 | AT4G20830 |
|                    | AT4G28490            | AT2G30400 | AT3G14620 | AT5G40780 |
|                    | AT4G17500            | AT2G38860 | AT3G23120 | AT3G21240 |
|                    | AT1G49050            | AT2G36800 | AT2G47130 | AT5G59540 |
|                    | AT5G54170            | AT4G14365 | AT5G39610 | AT1G18570 |
|                    | AT1G73500            | AT1G76590 | AT4G34135 | AT5G41750 |
|                    | AT3G28930            | AT3G47780 | AT2G46430 | AT4G24040 |
|                    | AT1G64950            | AT1G31580 | AT1G45145 | AT5G52750 |
|                    | AT4G31500            | AT5G20230 | AT3G19030 | AT5G17860 |
|                    | AT4G39950            | AT5G35735 | AT3G50480 | AT5G49520 |
|                    | AT1G74100            | AT3G48990 | AT2G43510 | AT4G14400 |
|                    | AT1G10370            | AT1G72120 | AT3G12220 | AT5G16970 |
|                    | AT4G34230            | AT1G21250 | AT5G60270 | AT2G36080 |
|                    | AT2G44080            | AT4G35110 | AT5G45380 | AT1G70140 |
|                    | AT5G24530            | AT2G18660 | AT2G23680 | AT2G43570 |
|                    | AT4G27830            | AT3G25610 | AT3G54420 | AT5G36220 |
|                    | AT1G21000            | AT1G35710 | AT1G79410 | AT2G15480 |
|                    | AT1G27020            | AT4G37370 | AT5G07010 | AT3G18550 |
|                    | AT1G72680            | AT4G13180 | AT5G06860 | AT3G63380 |
|                    | AT1G51760            | AT3G46660 | AT2G44790 | AT5G55050 |
|                    | AT3G20660            | AT5G60950 | AT4G02280 | AT1G55920 |
|                    | AT5G17000            | AT5G49480 | AT2G39980 | AT3G26830 |
|                    | AT3G50950            | AT3G21230 | AT2G30140 | AT5G49690 |
|                    | AT1G44350            | AT5G14780 | AT5G52760 | AT1G76930 |
|                    | AT1G06620            | AT2G36950 | AT4G18170 | AT1G19180 |
|                    | AT2G31750            | AT2G27830 | AT1G17170 | AT5G53290 |
|                    | AT5G47220            | AT4G18360 | AT3G16530 | AT3G46110 |
|                    | AT4G37410            | AT2G32160 | AT1G52890 | AT1G18390 |
|                    | AT1G32700            | AT2G15760 | AT1G66480 | AT1G72930 |
|                    | AT3G25760            | AT5G39050 | AT1G02920 | AT5G26340 |
|                    | AT4G15490            | AT4G38540 | AT1G02930 | AT3G05660 |
|                    | AT5G27420            | AT1G73805 | AT1G66760 | AT5G08790 |
|                    | AT1G26930            | AT5G66700 | AT3G13790 | AT3G24420 |
|                    | AT2G32150            | AT1G72900 | AT5G13330 | AT2G26560 |
|                    | AT5G01210            | AT4G22530 | AT3G50470 | AT4G02380 |
|                    | AT3G10985            | AT1G02400 | AT1G77450 | AT3G12580 |
|                    | AT3G22060            | AT5G52640 | AT4G21120 | AT3G60420 |
|                    | AT4G06744            | AT2G29420 | AT4G01870 | AT2G29440 |
|                    | AT3G56400            | AT4G36990 | AT4G15530 | AT2G24850 |
|                    | AT3G15356            | AT2G41231 | AT2G45570 | AT5G19240 |
|                    | AT1G62300            | AT2G43620 | AT4G02520 | AT2G24100 |
|                    | AT3G01290            | AT1G15520 | AT3G55970 | AT3G47340 |
|                    | AT5G52310            | AT5G42530 | AT2G39200 | AT5G63790 |
|                    | AT3G17609            | AT1G02850 |           |           |



**Supplemental Table 5. Differential-expressed genes co-regulated by AtD14-SMXL7**

| Up-regulated genes in both of <i>SMXL7-D</i> and <i>AtD14-I</i> | Down-regulated genes in both of <i>SMXL7-D</i> and <i>AtD14-I</i> |           | Down-regulated genes in <i>AtD14-I</i> But up-regulated in <i>SMXL7-D</i> |
|-----------------------------------------------------------------|-------------------------------------------------------------------|-----------|---------------------------------------------------------------------------|
| AT1G57750                                                       | AT1G77760                                                         | AT3G50480 | AT5G50200                                                                 |
| AT4G04955                                                       | AT1G64900                                                         | AT2G46680 | AT3G24420                                                                 |
| AT4G17860                                                       | AT4G19700                                                         | AT4G23170 | AT2G02010                                                                 |
| AT4G08950                                                       | AT4G27830                                                         | AT4G21380 | AT2G44080                                                                 |
| AT1G22160                                                       | AT2G41090                                                         | AT1G73480 | AT4G17500                                                                 |
| AT1G68600                                                       | AT3G51430                                                         | AT1G31580 | AT1G76680                                                                 |
| AT3G19680                                                       | AT5G54510                                                         | AT3G49120 | AT1G73500                                                                 |
| AT4G39800                                                       | AT5G36160                                                         | AT5G24530 | AT2G37040                                                                 |
| AT1G78020                                                       | AT1G44350                                                         | AT2G29340 |                                                                           |
| AT1G06350                                                       | AT1G50420                                                         | AT4G15490 |                                                                           |
| AT1G01120                                                       | AT1G45145                                                         | AT1G76590 |                                                                           |
| AT3G58120                                                       | AT4G27560                                                         | AT5G61820 |                                                                           |
| AT1G29660                                                       | AT4G37410                                                         | AT4G32480 |                                                                           |
| AT1G22530                                                       | AT1G69730                                                         | AT4G23600 |                                                                           |
| AT5G44680                                                       | AT1G49750                                                         | AT5G60900 |                                                                           |
| AT1G55330                                                       | AT2G47800                                                         | AT5G10760 |                                                                           |
| AT4G18970                                                       | AT3G05650                                                         | AT5G15970 |                                                                           |
|                                                                 | AT3G50950                                                         | AT1G73805 |                                                                           |
|                                                                 | AT4G34000                                                         | AT4G14400 |                                                                           |
|                                                                 | AT4G16690                                                         | AT5G17760 |                                                                           |
|                                                                 | AT2G23200                                                         | AT1G35910 |                                                                           |
|                                                                 | AT5G14780                                                         | AT1G52890 |                                                                           |
|                                                                 | AT2G38530                                                         | AT2G20670 |                                                                           |
|                                                                 | AT1G58340                                                         | AT2G40750 |                                                                           |
|                                                                 | AT1G49500                                                         | AT1G66760 |                                                                           |
|                                                                 | AT2G05380                                                         | AT2G41510 |                                                                           |
|                                                                 | AT1G69490                                                         | AT3G12220 |                                                                           |
|                                                                 | AT4G37540                                                         | AT5G42530 |                                                                           |
|                                                                 | AT1G17830                                                         | AT2G42540 |                                                                           |
|                                                                 | AT5G19120                                                         | AT2G36270 |                                                                           |
|                                                                 | AT1G02850                                                         | AT3G23120 |                                                                           |
|                                                                 | AT2G33380                                                         | AT2G46430 |                                                                           |
|                                                                 | AT5G52310                                                         | AT2G18050 |                                                                           |
|                                                                 | AT4G34710                                                         | AT1G16850 |                                                                           |
|                                                                 | AT3G05660                                                         | AT4G02280 |                                                                           |
|                                                                 | AT4G08870                                                         | AT5G66700 |                                                                           |
|                                                                 | AT1G21310                                                         | AT5G13370 |                                                                           |
|                                                                 | AT2G44290                                                         | AT3G25620 |                                                                           |
|                                                                 | AT4G37180                                                         | AT3G47340 |                                                                           |
|                                                                 | AT5G59220                                                         | AT2G25510 |                                                                           |
|                                                                 | AT1G03400                                                         | AT4G36850 |                                                                           |
|                                                                 | AT2G39710                                                         | AT3G14440 |                                                                           |
|                                                                 | AT2G37760                                                         | AT4G36740 |                                                                           |
|                                                                 | AT2G46440                                                         | AT1G62940 |                                                                           |
|                                                                 | AT2G24850                                                         | AT3G18550 |                                                                           |
|                                                                 | AT2G31083                                                         |           |                                                                           |

**Supplemental Table 6. Differential-expressed genes regulated by BRC1**

| Up-regulated genes in <i>brc1</i> (VS Col-0) | Down-regulated genes in <i>brc1</i> (VS Col-0) |
|----------------------------------------------|------------------------------------------------|
| AT1G62180                                    | AT2G14560                                      |
| AT1G04770                                    | AT3G57260                                      |
| AT5G15120                                    | AT2G18550                                      |
| AT4G08950                                    | AT3G20810                                      |
| AT3G02550                                    | AT4G36740                                      |
| AT3G03270                                    | AT5G60900                                      |
| AT1G05680                                    | AT3G14620                                      |
| AT1G58370                                    | AT1G72910                                      |
| AT1G72430                                    | AT4G14400                                      |
| AT5G64120                                    | AT3G12220                                      |
| AT3G27220                                    | AT5G10760                                      |
| AT4G25100                                    | AT2G24850                                      |
| AT5G39580                                    | AT2G25510                                      |
| AT2G38240                                    | AT3G14440                                      |
| AT4G24110                                    | AT5G52760                                      |
| AT3G20395                                    | AT2G40080                                      |
| AT2G19800                                    | AT3G48650                                      |
| AT2G02990                                    | AT2G46430                                      |
| AT5G39890                                    | AT1G52100                                      |
| AT3G10040                                    | AT3G19710                                      |
| AT2G16060                                    | AT3G23120                                      |
| AT4G10265                                    | AT3G25620                                      |
| AT1G43800                                    | AT2G32160                                      |
| AT4G33560                                    | AT5G42900                                      |
| AT4G33070                                    | AT1G21250                                      |
| AT4G39675                                    | AT1G16410                                      |
|                                              | AT3G50470                                      |
|                                              | AT1G35710                                      |
|                                              | AT3G60420                                      |
|                                              | AT5G66700                                      |
|                                              | AT4G02280                                      |
|                                              | AT5G64110                                      |
|                                              | AT1G73805                                      |
|                                              | AT4G14365                                      |
|                                              | AT2G47130                                      |
|                                              | AT5G24210                                      |
|                                              | AT4G23170                                      |
|                                              | AT2G46440                                      |
|                                              | AT3G26210                                      |
|                                              | AT3G50480                                      |
|                                              | AT2G43570                                      |
|                                              | AT4G33980                                      |
|                                              | AT5G42530                                      |
|                                              | AT1G31580                                      |
|                                              | AT3G19200                                      |
|                                              | AT1G45145                                      |
|                                              | AT1G69490                                      |
|                                              | AT5G57340                                      |
|                                              | AT3G09260                                      |
|                                              | AT2G46680                                      |
|                                              | AT4G22505                                      |
|                                              | AT5G24530                                      |
|                                              | AT5G17760                                      |
|                                              | AT5G59670                                      |
|                                              | AT2G14610                                      |
|                                              | AT2G47770                                      |
|                                              | AT3G17520                                      |
|                                              | AT5G16920                                      |

**Supplemental Table 7. Primers for genotyping, CHIP, EMSA, qPCR and recombinant vectors.**

| Name                       | sequences 5'-3'                          |
|----------------------------|------------------------------------------|
| <i>smx16</i> -LP           | AGCCAGAGAAAGACTCGAACC                    |
| <i>smx16</i> -RP           | TCAGATCCGAATCGTGAGTTC                    |
| <i>smx17</i> -LP           | CGTATTAGCCTCTCGGATTCC                    |
| <i>smx17</i> -RP           | GATCAAGAAACGAACGCTGAG                    |
| <i>smx18</i> -LP           | TAGCGAAACAATGCTTAACGG                    |
| <i>smx18</i> -RP           | TGGTGAGTAACTGCAAATCCC                    |
| <i>max2-1</i> -LP          | TACATGCAAGCATGCAACTTC                    |
| <i>max2-1</i> -RP          | AATAGGAACAAAATCGCCACC                    |
| LBP1.3                     | ATTTTGCCGATTTTCGGAAC                     |
| ChIP- <i>BRC1</i> pro-F1-F | ACGTAAGAAAAAGGAGCTACCC                   |
| ChIP- <i>BRC1</i> pro-F1-R | CATCAATCATGGCGATCCCTC                    |
| ChIP- <i>BRC1</i> pro-F2-F | CTTGAGGGATCGCCATGATTG                    |
| ChIP- <i>BRC1</i> pro-F2-R | TGATTTGCATTTACCGTAAG                     |
| ChIP- <i>BRC1</i> pro-F3-F | TGACCTTAGTTCTTTCTTACGGTGA                |
| ChIP- <i>BRC1</i> pro-F3-R | AGCATGCACTAAAAGATGCCTAAA                 |
| ChIP- <i>BRC1</i> pro-F4-F | TTTAGGCATCTTTTAGTGATGCT                  |
| ChIP- <i>BRC1</i> pro-F4-R | ACAACACAGGCGACGTAATT                     |
| ChIP- <i>BRC1</i> pro-F5-F | AAGTACGTCGCTGTGTGTG                      |
| ChIP- <i>BRC1</i> pro-F5-R | TGTTTCATGCCTTTTTAGGGGT                   |
| <i>BRC1</i> -pro-probe a-F | GAACAAATGCAATATATCAATAGTTAGTGACATATGAAG  |
| <i>BRC1</i> -pro-probe a-R | CTTCATATGTACTACTAATATTGATATATTGCATTTGTTT |
| <i>BRC1</i> -pro-probe b-F | AACATAAACAAACACAAGGTCTAATTATAGAAAAAATC   |
| <i>BRC1</i> -pro-probe b-R | GATTTTTTCTATAATTAGGACCTTGTTGTTGTTTATGTT  |
| <i>BRC1</i> -pro-probe c-F | AAGAAGATTATAGTACAAGTGTCATTCTCAAAATTTTGTC |
| <i>BRC1</i> -pro-probe c-R | GACAAAATTTGAGAATGACACTGTACTATAATCTTCTT   |
| <i>BRC1</i> -qPCR-F        | GGAAACAAGGTCGATGGGAGA                    |
| <i>BRC1</i> -qPCR-R        | TTTAAAATGGGCGTTTCGCGG                    |
| <i>BES1</i> -qPCR-F        | GGCTACTATACCTGAATGTG                     |
| <i>BES1</i> -qPCR-R        | AGAGAATGGCTGTTGTTG                       |
| U-BOX-F                    | TCTTCTTCTGCTACATCTACTCTC                 |
| U-BOX-R                    | AGTGTGTGAACCCGTGAAC                      |
| <i>ACT2</i> -F             | TGCTGTTGACTACGAGCAGG                     |
| <i>ACT2</i> -R             | TCCATTTCCACAAACGAGGG                     |
| ChIP- <i>DWF4</i> pro-F    | GACAATGCCAAAAGTCTACGGG                   |
| ChIP- <i>DWF4</i> pro-R    | GGAGCTAGTTTCTCTCTCTCTC                   |
| <i>BES1</i> -F             | ATGACGTCTGACGGAGCAAC                     |
| <i>BES1</i> -R             | ACTATGAGCTTTACCATTTC                     |
| <i>BES1</i> -L-F           | ATGAAAAGATTCTTCTATAATTCCAGC              |
| <i>BES1</i> pro -F         | ATATTAGTATCACTATTCTGCTATTCCTAG           |
| Overlapping-bes1-D-F       | CCTGGCTACTAT ACCTG                       |
| Overlapping-bes1-D-R       | CAGGTATAGTAGCCAGG                        |

|                                   |                                          |
|-----------------------------------|------------------------------------------|
| <i>SMXL6-F</i>                    | ATGCCGACGCCGGTGACTACGG                   |
| <i>SMXL6-R</i>                    | CCATATCACATCCACC                         |
| <i>SMXL7-F</i>                    | ATGCCGACACCAGTAACC                       |
| <i>SMXL7-R</i>                    | GATCACTTCGACTCTC                         |
| <i>SMXL8-F</i>                    | ATGCCAACGGCGGTGAAT                       |
| <i>SMXL8-R</i>                    | CTACTGAGATTTTACAAA                       |
| <i>SMXL7pro-F</i>                 | TCTACTGTGCATCAAGACAT                     |
| overlapping- <i>SMXL7-D-F2</i>    | CAGATTGTCTGAGGCTATGACACTCCGTGACTCGCATGGG |
| overlapping- <i>SMXL7-D-R2</i>    | CCCATGCGAGTCACGGAGTGTCATAGCCTCAGACAATCTG |
| overlapping- <i>SMXL7-mEAR-F2</i> | GCGTTCGTTTGCTGATGCAAATGCTCCTGTGGATGAG    |
| Overlapping- <i>SMXL7-mEAR-F2</i> | GCGTTCGTTTGCTGATGCAAATGCTCCTGTGGATGAG    |

---
