# Supplementary material for: BES1 Functions as the Co-regulator of D53-like SMXLs to Inhibit BRC1 Expression in Strigolactone-Regulated Shoot Branching in Arabidopsis
Source: PubMed Central journal article supplement — Plant Commun. 2019 Dec 12;1(3):100014. doi: 10.1016/j.xplc.2019.100014 (PMC7748003; doi:10.1016/j.xplc.2019.100014), 2019-12-12
Supplement: mmc2.pdf [file mmc2.pdf]

# BES1 Functions as the Co-regulator of D53-like SMXLs to Inhibit *BRC1* Expression in Strigolactone-Regulated Shoot Branching in *Arabidopsis*

Jie Hu<sup>1</sup>, Yuanyuan Ji<sup>1,2</sup>, Xiaotong Hu<sup>1</sup>, Shiyong Sun<sup>1,\*</sup> and Xuelu Wang<sup>1,\*</sup>

<sup>1</sup>National Key Laboratory of Crop Genetic Improvement and Center of Integrative Biology, College of Life Science and Technology, Huazhong Agricultural University, Wuhan 430070, China

<sup>2</sup>Department of Genetics, School of Life Sciences, Fudan University, Shanghai 200438, China

\*Correspondence: Shiyong Sun ([sunshiyong@mail.hzau.edu.cn](mailto:sunshiyong@mail.hzau.edu.cn)), Xuelu Wang ([xlwang@mail.hzau.edu.cn](mailto:xlwang@mail.hzau.edu.cn))

<https://doi.org/10.1016/j.xplc.2019.100014>

## ABSTRACT

Shoot branching, determining plant architecture and crop yield, is critically controlled by strigolactones (SLs). However, how SLs inhibit shoot branching after its perception by the receptor complex remains largely obscure. In this study, using the transcriptomic and genetic analysis as well as biochemical studies, we reveal the key role of BES1 in the SL-regulated shoot branching. We demonstrate that BES1 and D53-like SMXLs, the substrates of SL receptor complex D14–MAX2, interact with each other to inhibit *BRC1* expression, which specifically triggers the SL-regulated transcriptional network in shoot branching. BES1 directly binds the *BRC1* promoter and recruits SMXLs to inhibit *BRC1* expression. Interestingly, despite being the shared component by SL and brassinosteroid (BR) signaling, BES1 gains signal specificity through different mechanisms in response to BR and SL signals.

**Key words:** strigolactones, shoot branching, signaling, D53-like SMXLs, BES1, *BRC1*

Hu J., Ji Y., Hu X., Sun S., and Wang X. (2020). BES1 Functions as the Co-regulator of D53-like SMXLs to Inhibit *BRC1* Expression in Strigolactone-Regulated Shoot Branching in *Arabidopsis*. *Plant Comm.* **1**, 100014.

## INTRODUCTION

Strigolactones (SLs), a class of the terpenoid phytohormones (Gomez-Roldan et al., 2008; Umehara et al., 2008), are firstly recognized as symbiotic signals responsible for induction of seed germination of root parasite plants and as branching factors for symbiotic arbuscular mycorrhizal fungi (Cook et al., 1966; Akiyama et al., 2005). Although SLs have been recently found to regulate many plant developmental processes, including root hair elongation, primary root growth, adventitious and lateral root formation, secondary vascular growth, internode growth, and leaf senescence, inhibiting bud outgrowth in shoot branching regulation is one of their well-known functions in plants (Al-Babili and Bouwmeester, 2015). Mutants deficient in SL biosynthesis or signaling in *Arabidopsis thaliana* (*more axillary growth*, *max*), *Pisum sativum* (*ramosus*, *rms*), *Oryza sativa* (*dwarf*, *d*, or *high tillering dwarf*, *htd*), and *Petunia hybrida* (*decreased apical dominance*, *dad*), all exhibit enhanced branching phenotypes (Beveridge and Kyojuka, 2010; Domagalska and Leyser, 2011).

SL signaling is initiated when the  $\alpha/\beta$ -hydrolase enzyme DWARF14 (D14) binds SLs and generates a covalently linked

intermediate molecule. In turn, this triggers a conformational change in the structure of D14 to facilitate its interaction with an F-box protein DWARF3 (D3)/MAX2 (Nakamura et al., 2013; De Saint Germain et al., 2016; Yao et al., 2016). Recently, it was reported that D3 adopts a conformational state with a dislodged CTH (C-terminal  $\alpha$  helix) to bind and inhibit D14 (Shabek et al., 2018). In an SL-dependent manner, D3/MAX2 induces the ubiquitination and degradation of its substrates to transduce SL signals, including D53/D53-like SMXLs (SUPPRESSOR OF MAX2-1 LIKEs, SMXL6, SMXL7, and SMXL8, three orthologs of D53 in *Arabidopsis* involved in shoot branching) (Jiang et al., 2013; Zhou et al., 2013; Soundappan et al., 2015; Wang et al., 2015), and a basic-helix-loop-helix transcription factor BES1 (*bri1*-EMS-SUPPRESSOR 1) (Wang et al., 2013). D53/D53-like SMXLs proteins, with ethylene-responsive element binding factor-associated amphiphilic repression (EAR) motifs, act as putative transcriptional

Published by the Plant Communications Shanghai Editorial Office in association with Cell Press, an imprint of Elsevier Inc., on behalf of CSPB and IPPE, CAS.

## Plant Communications

repressors to recruit TOPLESS-related proteins. Recently, the crystal structure study demonstrates that D53 promotes assembly of a corepressor–nucleosome complex with TPR2 through the EAR motif, which strongly suggests that the transcriptional regulation is key to transduce SL signaling (Ma et al., 2017). However, D53/D53-like SMXLs are transcription regulators without direct DNA-binding ability (Ma et al., 2017; Song et al., 2017), indicating that they need adaptors to affix DNA to mediate the SL-regulated transcription and shoot branching. BES1 is a transcription factor with DNA-binding activity that directly promotes or inhibits gene expression (Yin et al., 2005). Although BES1 is involved in the SL signaling by the D14–MAX2-mediated degradation in *Arabidopsis* (Wang et al., 2013), how BES1 mediates the transcriptional regulation in SL signaling is still unknown. In addition, the transcription factor *BRC1* (*BRANCHED 1*) has been reported to be a key switch for inhibiting shoot branching and is regulated by multiple environments and phytohormones, including SLs, in many plant species (Doebley et al., 1995; Aguilar-Martinez et al., 2007; Lewis et al., 2008; Martíntrillo et al., 2011; Choi et al., 2012; Dun et al., 2013; Gonzalez-Grandio et al., 2013). Although *BRC1* has been reported to regulate shoot branching genetically downstream of SL signaling (Aguilar-Martinez et al., 2007; Braun et al., 2012; Dun et al., 2012; Guan et al., 2012; Lu et al., 2013), the molecular mechanism of how SL signaling regulates *BRC1* is still unknown in *Arabidopsis*. It is known that transcriptional networks tightly orchestrate the growth and development of mammals and plants, and these networks are triggered by various developmental and environmental cues. Therefore, to complete a signaling pathway, key steps are to identify its essential transcription factors, and reveal that how those transcription factors are regulated by upstream signaling to trigger the signal-specific transcription networks (Hwang and Sheen, 2001; Valverde et al., 2004; Smit et al., 2005; Yin et al., 2005; Pinkston-Gosse and Kenyon, 2007). However, how SL signaling initiates the downstream transcriptional network after SL perception is still unknown.

In addition, BES1 has been initially identified as a primary signaling component in the brassinosteroid (BR) signaling pathway. It is tightly regulated mainly through the dynamic alteration of its phosphorylation status to transduce BR signal by the BR early signaling components, BIN2 (BRASSINOSTEROID INSENSITIVE 2) (Yin et al., 2002, 2005) and PP2A (PROTEIN PHOSPHATASE 2A) (Tang et al., 2011). In BR signaling, the non-phosphorylated and phosphorylated BES1s have different DNA-binding activities to regulate the BR-responsive genes (He et al., 2002). However, in the SL signaling pathway, both phosphorylated and non-phosphorylated BES1s are the direct substrates of SL receptor complex D14–MAX2 to control shoot branching (Wang et al., 2013). Interestingly, the BR signaling components upstream of BES1 display no function in shoot branching in *Arabidopsis* (Wang et al., 2013). This raises the question of how BES1 differentially functions in the BR and SL signaling to regulate signal-specific developmental processes.

Our transcriptomic and genetic analysis indicate that D53-like SMXLs and BES1 genetically depend on each other to regulate shoot branching through *BRC1*. This is further supported by the biochemical results that BES1 physically interacts with D53-like SMXLs to inhibit *BRC1* expression, which depends on direct

## BES1–SMXLs Inhibit *BRC1* Expression in Branching

binding of BES1 to the *BRC1* promoter, and the EAR motif of D53-like SMXLs that represses the transcription of *BRC1*. In addition, we demonstrate that BRs treatment has no effect on the interaction of SMXLs with BES1 and the *BRC1* expression, and the altered phosphorylation status of BES1 cannot affect its DNA-binding ability with the *BRC1* promoter. Together, these findings reveal the mechanisms of how the BES1–D53-like SMXLs complexes transduce SL signals in shoot branching, and how BES1 differentially functions in SL and BR signaling pathways to control signal-specific developmental processes.

## RESULTS

### BES1- and D53-like SMXLs Genetically Depend on Each Other in Shoot Branching

To explore how SL signaling was involved in the transcriptional regulation in shoot branching, we detected the transcriptional profiles in the young buds (bud length  $\leq 3$  mm) of the SL signaling-related plant materials, including *MAX2:bes1-D-FLAG/Columbia-0* (Col-0) (a gain-of-function form of *BES1*, which was stable under GR24-induced degradation, defined as *MAX2:bes1-D* below) (Wang et al., 2013), *SMXL7-D-GFP/Col-0* (a gain-of-function form of genomic *SMXL7*, which was stable under GR24-induced degradation, defined as *SMXL7-D* below) (Jiang et al., 2013; Soundappan et al., 2015; Wang et al., 2015; Zhou et al., 2013), *Atd14-1*, and their wild-type Col-0. These materials were reported to exhibit the increased branching number compared with the wild-type Col-0 (Arite et al., 2009; Soundappan et al., 2015; Wang et al., 2013, 2015). First, 506 differentially expressed genes were identified from the comparison between *Atd14-1* and the wild-type Col-0, including 42 induced and 464 repressed genes (Supplemental Figure 1A and Supplemental Table 1). These genes were defined as SL-regulated genes because of the high specificity of the receptor AtD14 in SL signaling. There were 516 genes differentially expressed in buds from the comparison of *MAX2:bes1-D* versus the wild-type Col-0, including 15 upregulated and 501 downregulated genes (Supplemental Figure 1A and Supplemental Table 2). Significantly, 52.33% of the BES1-regulated genes were co-regulated by the SL receptor AtD14 (Figure 1A and Supplemental Figure 1A), and all of them were downregulated in both the *MAX2:bes1-D* and *Atd14-1* (Supplemental Figure 1B and Supplemental Table 3), suggesting that BES1 was a major transcription factor involved in the SL-regulated shoot branching. More independent *bes1-D* transgenic lines driven by the promoters of *MAX2* or *BES1*, and the *bes1-L-D* (*BES1-L*, the long form of *BES1*) (Jiang et al., 2015) transgenic lines driven by the 35S promoter further confirmed the function of BES1 in promoting shoot branching (Supplemental Figure 2A–2F). In addition, another published independent *BES1-RNAi* line with reduced expression of BES1 and its close homologs (Yin et al., 2005) also showed decreased branch number compared with the wild type (Supplemental Figure 2G and 2H). Furthermore, BES1 was highly expressed in the axillary buds as indicated by the *pBES1-L::GUS* and *pBES1-S::GUS* reporters (Supplemental Figure 3), supporting its key role in shoot branching. Second, there were 116 differentially expressed genes co-regulated by AtD14 and SMXL7 (Figure 1A, Supplemental Figure 1C, Supplemental Tables 4 and 5), all of which showed similar regulatory mode in the *Atd14-1* and *SMXL7-D* (Supplemental

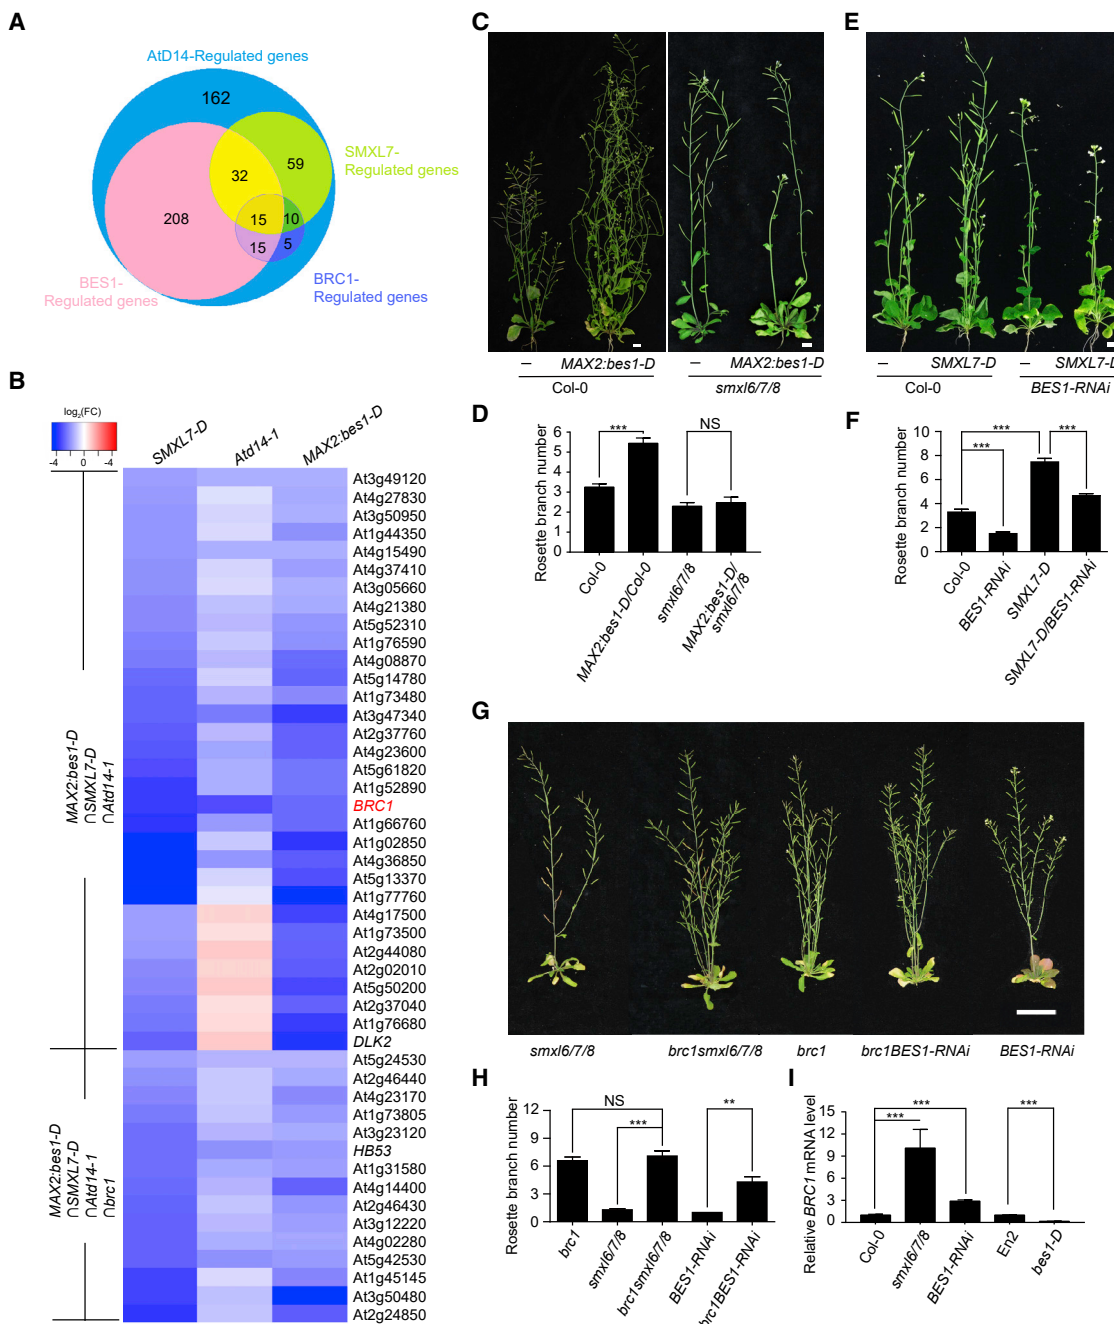

**Figure 1. BES1- and D53-like SMXLs Genetically Depend on Each Other to Regulate *BRC1*-Mediated Shoot Branching through *BRC1*.**

(A) Venn diagram of the number of differentially expressed genes in buds of *Atd14-1*, *SMXL7-D*, *MAX2:bes1-D*, and *brc1*, compared with Col-0, and co-regulated by *AtD14*. Differentially expressed genes in buds were obtained from cuffdiff analysis with  $q$  value  $< 0.05$ .

(B) Heatmap of the 47 co-regulated genes by *AtD14*, *SMXL7*, and *BES1* in (A). Original fold change values were transformed by  $\log_2$  regression for the heatmap shown in the colored bar.

(C) Phenotypes of Col-0, *MAX2:bes1-D/Col-0*, *smx16/7/8*, and *MAX2:bes1-D/smx16/7/8* plants. Scale bar corresponds to 1 cm.

(D) Quantification of rosette branch number of the plants in (C). Data are means  $\pm$  SE, Col-0 ( $n = 20$ ), *MAX2:bes1-D/Col-0* ( $n = 27$ ), *smx16/7/8* ( $n = 27$ ), and *MAX2:bes1-Dsmx16/7/8* ( $n = 21$ ).

(E) Phenotypes of Col-0, *BES1-RNAi*, *SMXL7-D*, and *SMXL7-D/BES1-RNAi* plants. Scale bar corresponds to 1 cm.

(F) Quantification of rosette branch number of the plants in (E). Data are means  $\pm$  SE, the sample number was Col-0 ( $n = 17$ ), *BES1-RNAi* ( $n = 26$ ), *SMXL7-D* ( $n = 19$ ), and *SMXL7-D/BES1-RNAi* ( $n = 15$ ).

(G) Genetic analysis of *BRC1*, *SMXLs*, and *BES1* in shoot branching. Scale bar corresponds to 5 cm.

(legend continued on next page)

## Plant Communications

Figure 1D). Significantly, 40.52% of them, 47 genes, were also regulated by BES1 (Figure 1A and 1B). Thus, we predicted that SMXL7 might be a major partner for the function of BES1 in SL-regulated shoot branching. Notably, there were still 223 genes co-regulated by BES1 and AtD14, but not by SMXL7 (Figure 1A), suggesting that BES1 was highly specific in the SL-regulated bud outgrowth, and that homologs of SMXL7 were also needed in SL signaling (Stanga et al., 2013, 2016; Wallner et al., 2017). Several key genes that have been reported to be involved in shoot branching were regulated by both BES1 and SMXL7 in the SL-regulated genes (Figure 1B). For example, *HB53* (*HOMEBOX PROTEIN 53*), which encodes an HD-ZIP protein in axillary buds, inhibits shoot branching in response to abscisic acid (Gonzalez-Grandio et al., 2017). Importantly, the transcription factor *BRC1*, a key inhibitor for shoot branching (Aguilar-Martinez et al., 2007; Choi et al., 2012; Doebley et al., 1995; Dun et al., 2013; Gonzalez-Grandio et al., 2013; Lewis et al., 2008; Martíntrillo et al., 2011), was strongly co-regulated by BES1, SMXL7, and AtD14 (Figure 1B), which was consistent to its function in the downstream of SL signaling. Significantly, 53.57% of the *BRC1*-regulated genes were regulated by AtD14 (Figure 1A, Supplemental Figure 1A and Supplemental Table 6); and 89% of the genes co-regulated by *BRC1* and AtD14 were regulated by BES1 and SMXL7 with similar regulatory modes in their buds (Figure 1B, Supplemental Figure 1E and 1F). Some genes that were reported to be involved in bud development, including *HB40* (*HOMEBOX PROTEIN 40*), *NCED3* (*9-CIS-EP-OXICAROTENOID. DIOXIGENASE 3*), *NAP* (*NAC-LIKE, ACTIVATED BY AP3/PI*), and *UGT74E2* (*UDP-glycosyltransferase 74E2*), were also found to be under *BRC1* regulation (Figure 1B and Supplemental Figure 1E and 1F) (Dong et al., 2008; Tognetti et al., 2010; Gonzalez-Grandio et al., 2013, 2017; Holalu and Finlayson, 2017). Therefore, our transcriptome analysis suggests that the SL-regulated transcriptional network in shoot branching is largely dependent on the SMXLs–BES1–*BRC1* module.

To further reveal the relationship among SMXLs, BES1, and *BRC1* in SL-inhibited shoot branching, we performed a set of genetic analyses, and found that *MAX2:bes1-D* could not rescue the branching phenotype of the *smxl6/7/8* as indicated by the *MAX2:bes1-D/smxl6/7/8* line (Figure 1C and 1D), suggesting that BES1 required SMXLs to promote branching; similarly, the branch number of the *SMXL7-D/BES1-RNAi* was significantly decreased compared with the *SMXL7-D/Col-0* line (Figure 1E and 1F), suggesting that SMXL7 also depended on BES1 to promote branching. Therefore, BES1- and D53-like SMXLs are likely dependent on each other to regulate shoot branching. Furthermore, *brc1* was able to rescue the branching phenotypes of either *smxl6/7/8* (Seale and Bennett, 2017) or the *BES1-RNAi* line (Figure 1G and 1H), which indicated that *BRC1* acted downstream of both D53-like SMXLs and BES1 to control shoot branching. In addition, the *BRC1* expression was lower in the buds of *bes1-D*, *MAX2:bes1-D/Col-0*, and *SMXL7-D-GFP/Col-0* lines, but higher in the *BES1-RNAi* lines, *smxl6/7/8* (Wang

## BES1–SMXLs Inhibit *BRC1* Expression in Branching

et al., 2015), the *MAX2:bes1-D-FLAG/smx6/7/8* lines, and the *SMXL7-D-GFP/BES1-RNAi* lines than in the wild type (Figure 1I and Supplemental Figure 4A–4C), indicating that knockdown of either BES1 or SMXLs could reduce the inhibitory effect on *BRC1* expression. Taken together, we conclude that the D53-like SMXLs and BES1 genetically depend on each other to induce the SL-regulated transcriptional network mainly via *BRC1* for *Arabidopsis* shoot branching.

## BES1 Interacts with D53-like SMXLs to Directly Inhibit *BRC1* Expression

Our further biochemical experiments demonstrated that SMXLs directly interacted with BES1 in pull-down assay, and also with BES1 and its homologs in bimolecular fluorescence complementation (BiFC) assays (Figure 2A and 2B and Supplemental Figure 5). In addition, both the phosphorylated and dephosphorylated BES1s were able to interact with SMXLs (Figure 2C), which was consistent with a previous report that both phosphorylated and dephosphorylated BES1s were able to interact with and be induced to be degraded by MAX2 (Wang et al., 2013), suggesting that both phosphorylated and dephosphorylated BES1s participated in SL signaling. Furthermore, BES1 interacted with D53-like SMXLs with or without additional SLs, BRs, or SLs plus BRs (Supplemental Figure 6).

D53/D53-like SMXLs have been reported to induce the oligomerization of TPL tetramer through linking tetramer–tetramer interaction and stabilize the TOPLESS corepressor–nucleosome interaction, which subsequently leads to the formation of repressive chromatin structures to inhibit transcription (Ke et al., 2015; Ma et al., 2017). Due to lacking direct DNA-binding ability, D53 requires an adaptor to specifically target promoters for transcriptional inhibition via chromatin modification (Ma et al., 2017; Song et al., 2017). Therefore, the interaction between BES1 and SMXLs raises the possibility that BES1 and its homologs likely serve as adaptors for SMXLs to proximate DNA and inhibit gene expression. To test this hypothesis, we detected whether BES1 could bind to the *BRC1* promoter. Chromatin immunoprecipitation (ChIP)-qPCR and electrophoretic mobility shift assay (EMSA) assays showed that BES1 directly bound to the *BRC1* promoter fragments F2, F4, and F5, which contain the E-box and GGTCC elements (BES1 binding sites reported in a previous study [Sun et al., 2010]) (Figure 3A–3C). Furthermore, to investigate the interdependency between BES1 and SMXLs to inhibit *BRC1* expression, we performed ChIP assays using the buds in the junction between shoots and roots of different plant materials (Supplemental Figure 7A). We detected the enrichment of *BRC1* promoter by SMXL7 in the buds of *SMXL7-D-GFP/Col-0* and the *SMXL7-D-GFP/BES1-RNAi* lines using anti-GFP beads. The results showed the enrichment of *BRC1* promoter by SMXL7-D-GFP was much less in the *SMXL7-D-GFP/BES1-RNAi* plants than in the *SMXL7-D-GFP/Col-0* plants

(H) Quantification of rosette branch number of the plants in (G). Data are means  $\pm$  SE, the sample number was *brc1* ( $n = 20$ ), *smxl6/7/8* ( $n = 20$ ), *brc1smxl6/7/8* ( $n = 20$ ), *BES1-RNAi* ( $n = 26$ ), and *brc1BES1-RNAi* ( $n = 17$ ).

(I) Relative expression of *BRC1* in the buds of Col-0, *smxl6/7/8*, *BES1-RNAi*, En2, and *bes1-D* plants.

Data are means  $\pm$  SD ( $n = 6$ ) and *P* values in (D), (F), (H), and (I) were determined by Student's *t*-test; \*\*\**P* < 0.001, \*\**P* < 0.01, non-significant (NS), *P* > 0.05. See also Supplemental Figures 1 and 2.

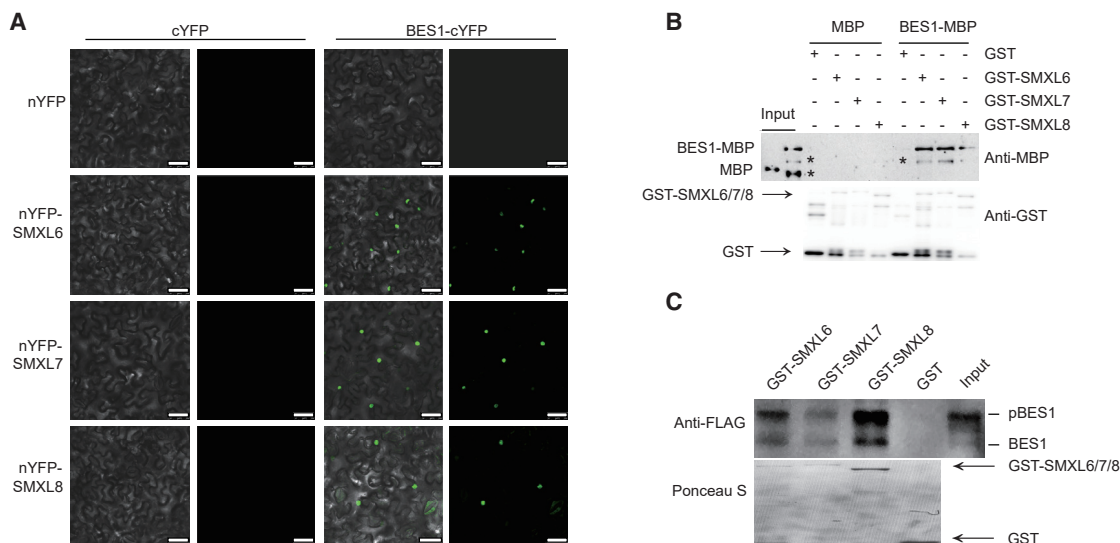

**Figure 2. The D53-like SMXLs Interact with BES1.**

(A) D53-like SMXLs interacted with BES1 in bimolecular fluorescence complementation assays. Scale bars correspond to 50  $\mu$ m.

(B) D53-like SMXLs interacted with BES1 in a GST pull-down assay. Asterisks (\*) indicated a nonspecific band. Anti-GST was used to show the amounts of the loaded GST and GST-SMXLs proteins.

(C) Both the phosphorylated and dephosphorylated forms of BES1 interacted with D53-like SMXLs in a semi-*in vivo* pull-down assay using *35S:BES1-FLAG* plants. Ponceau S staining showed the loaded GST and GST-SMXLs proteins.

See also Supplemental Figures 5 and 6.

(Figure 3D), resulting in a decreased inhibition of *BRC1* expression in buds of the *SMXL7-D-GFP/BES1-RNAi* line compared with that in the *SMXL7-D-GFP/Col-0* line (Supplemental Figure 4B). It is indicated that the inhibition of SMXL7 on *BRC1* expression requires BES1 binding to the *BRC1* promoter. On the other hand, we detected the enrichment of the *BRC1* promoter by BES1 in buds of the *smxl6/7/8* and the Col-0 plants, and found that although the fragments of the *BRC1* promoter enriched by BES1 were significantly higher in the *smxl6/7/8* plant than in the Col-0 (Figure 3E), the *BRC1* expression level was still higher in the *smxl6/7/8* plant than that in Col-0 (Figure 1I and Supplemental Figure 4A), which meant that the inhibition of BES1 on *BRC1* expression required SMXLs. In addition, we also tested whether the interdependency between D53-like SMXLs and BES1 directly affected *BRC1* expression using the *BRC1:LUC* reporter in a transient expression assay in *N. benthamiana* leaves. The *SMXL7-D* and *bes1-D* were constructed as effectors, *35S:GFP* was used as the control effector, and *BRC1:LUC* linking *35S* controlling *Renilla* luciferase (*REN*) was the reporter (Figure 3F). The LUC/REN ratio was significantly reduced in *SMXL7-D/bes1-D* co-expressed lines compared with the lines expressing *SMXL7-D* or *bes1-D*, respectively (Figure 3G). We further measured the effect of D53-like SMXLs and BES1 on *BRC1* expression using a direct LUC reporter system in *N. benthamiana* leaves with *35S:LUC* as the reporter (Supplemental Figure 8A). The LUC intensity showed similar results that *BRC1* expression was largely inhibited by the co-expression of SMXLs and BES1 (Supplemental Figure 8B–8D). Therefore, the interdependency between BES1 and SMXL7 directly affects *BRC1* expression in shoot branching.

Because the transcriptional repression by the EAR-contained proteins was highly conserved and general in many signaling pathways among diverse plant species (Kagale and Rozwadowski, 2011), and that the EAR motif in SMXL7 was required for branching (Liang et al., 2016), we next asked whether the EAR motif in SMXL7 was also required by the BES1-SMXLs complex to inhibit *BRC1* expression. The *SMXL7-D-mEAR-GFP* was constructed to detect the function of the EAR motif of SMXL7 in regulating *BRC1* expression (Wang et al., 2015). We first tested and confirmed that *SMXL7-D-mEAR* showed a similar ability to interact with BES1 as SMXL7 and SMXL7-D (Supplemental Figure 9). When using either the dual bioluminescence or the *BRC1:LUC* reporter system in *N. benthamiana*, the activities of *BRC1:LUC* were significantly higher in the *SMXL7-D-mEAR/MAX2:bes1-D* than in the *SMXL7-D/MAX2:bes1-D* co-expressing leaves, and were significantly higher in the *SMXL7-D-mEAR* than in the *SMXL7-D* expressing leaves (Figure 3H and Supplemental Figure 8E–8G). To further investigate the function of the EAR motif of SMXL7 in shoot branching *in planta*, *SMXL7-D-GFP* and *SMXL7-D-mEAR-GFP* transgenic lines were generated. The *SMXL7-D-GFP* lines showed an increased number of rosette shoot branches, but the shoot branch number of the *SMXL7-D-mEAR-GFP* line was similar to that of the wild type (Supplemental Figure 7B and 7C), which was consistent with the results reported in a previous study (Liang et al., 2016). Furthermore, the transcription level of *BRC1* in the buds of the *SMXL7-D-mEAR-GFP* line showed no obvious difference from that of the wild type, but was remarkably higher than that in the *SMXL7-D-GFP* line (Supplemental Figure 7D). Therefore, the EAR motif of SMXLs is required by the SMXLs-BES1 complex to inhibit *BRC1* expression.

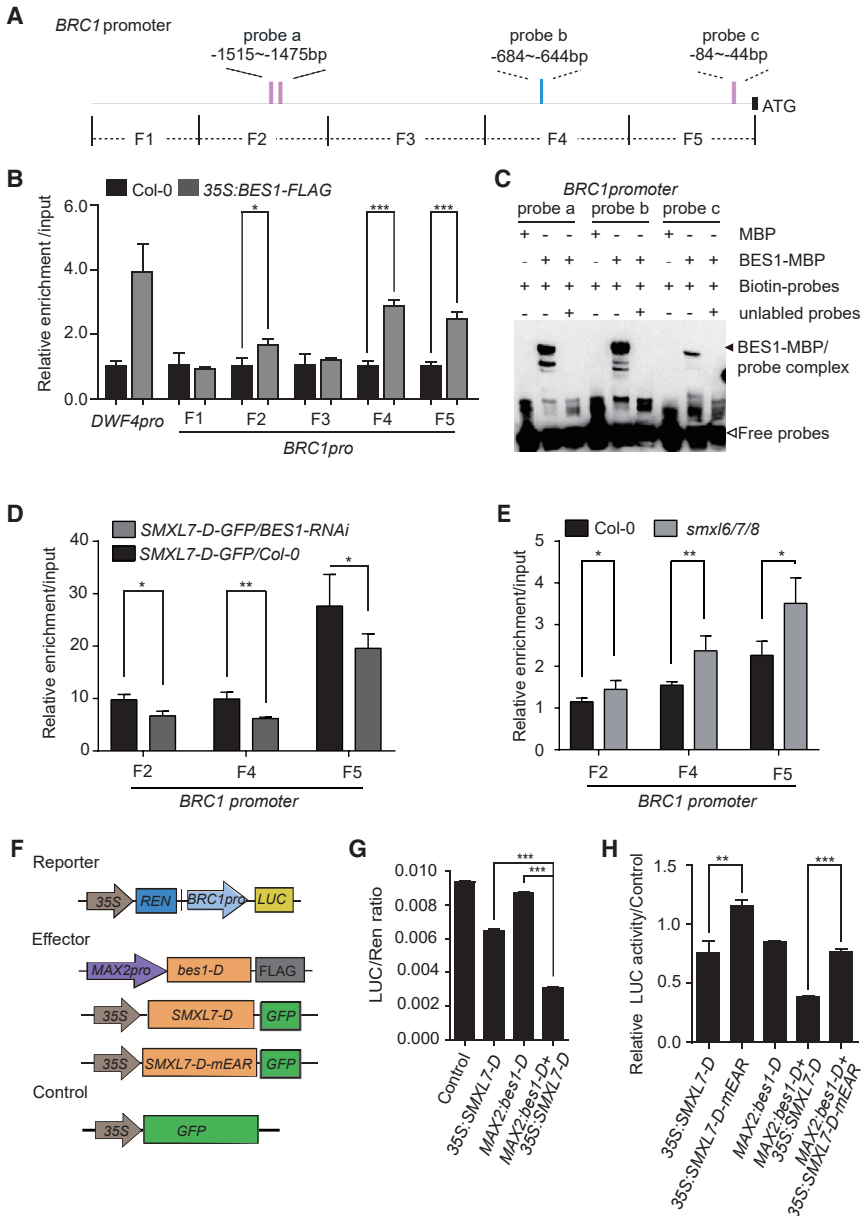

**Figure 3. The D53-like SMXLs and BES1 Depend on Each Other to Directly Inhibit *BRC1* Expression in Shoot Branching.**

(A) Schematic representation showed fragments and probes of the *BRC1* promoter in (B)–(E). Pink bars indicated the *cis*-E-box. Blue bars show the GTTCC element.

(B and C) BES1-MBP directly bound to the *BRC1* promoter in ChIP-qPCR (B) and EMSA (C) assays. Solid and open triangles indicate BES1-MBP-DNA bands and free probe, respectively.

(D) The relative enrichment of *BRC1* promoter by SMXL7-GFP used anti-GFP beads in buds of SMXL7-D-GFP/Col-0 and SMXL7-D-GFP/BES1-RNAi plants.

(E) The relative enrichment of *BRC1* promoter used anti-BES1 antibody in buds of Col-0 and *smxl6/7/8* plants.

(F) Schematic diagrams of the luciferase reporter and effector constructs used in *N. benthamiana* transient assays.

(G) SMXL7 and BES1 corporately inhibited the expression of *BRC1::LUC*.

(H) Mutation of the EAR motif in SMXL7 reduced the inhibition of *BRC1* expression by the SMXLs-BES1 complex. LUC/REN ratio was normalized to the corresponding control defined as the relative LUC activity.

Data are means  $\pm$  SD ( $n = 3$ ) and  $P$  values in (B)–(E), (G), and (H) were determined by Student's  $t$ -test; \*\*\* $P < 0.001$ , \*\* $P < 0.01$ , \* $P < 0.05$ .

See also Supplemental Figures 4, 7, 8, and 9.

### BES1 Differentially Functions in SL and BR Signaling in *Arabidopsis*

Significantly, BES1 is differently regulated by SL and BR signaling in *Arabidopsis*. In BR signaling, BES1 is regulated through alteration of its phosphorylation status (Yang et al., 2017), the stability of BES1 is not primarily regulated by BR signaling in *Arabidopsis* (Jiang et al., 2015; Yang and Wang, 2017); while in SL signaling both the phosphorylated and dephosphorylated BES1s are induced to be degraded by MAX2 (Wang et al., 2013) and interact with D53-like SMXLs (Figure 2C and Supplemental Figure 6). Furthermore, mutants of the BR signaling components upstream of BES1 did not alter branch number (Wang et al., 2013) and *BRC1* expression (Figure 4A); and BR treatments had no effects on *BRC1* expression, while SLs effectively induced the *BRC1* expression with or without BRs (Figure 4B and Supplemental Figure 10). To further reveal

the underlying reasons, we performed ChIP-qPCR assays using the BES1 antibody to detect the enrichment of *BRC1* promoter by BES1 in Col-0 and the BR receptor mutant *bril-301*, in which BES1 was mainly in phosphorylated status (Supplemental Figure 4D). Interestingly, BES1 in the BR receptor mutant *bril-301* had a similar ability to enrich the *BRC1* promoter, but had a largely reduced ability to enrich the *DWF4* promoter (Figure 4C), a well-known BR/BES1-targeted gene (He et al., 2005), which well explained the similar *BRC1* expression in the BR-related mutants and the wild type (Figure 4A), as well as the unchanged *BRC1* expression under BR treatments (Figure 4B). Taken together, these results demonstrate that the alteration of the BES1 phosphorylation status by BR signaling has no effect on *BRC1* expression and shoot branching, and that the function of BES1 in SL signaling is independent of that in BR signaling in *Arabidopsis* (Figure 4D). Therefore, when both SLs and BRs are present, BRs cannot change the SL-controlled shoot branching by altering the phosphorylated status of BES1 in *Arabidopsis* (Figure 4D).

### DISCUSSION

In this study, we reveal that BES1 acts as the adaptor of D53-like SMXLs to trigger the SL-regulated transcriptional

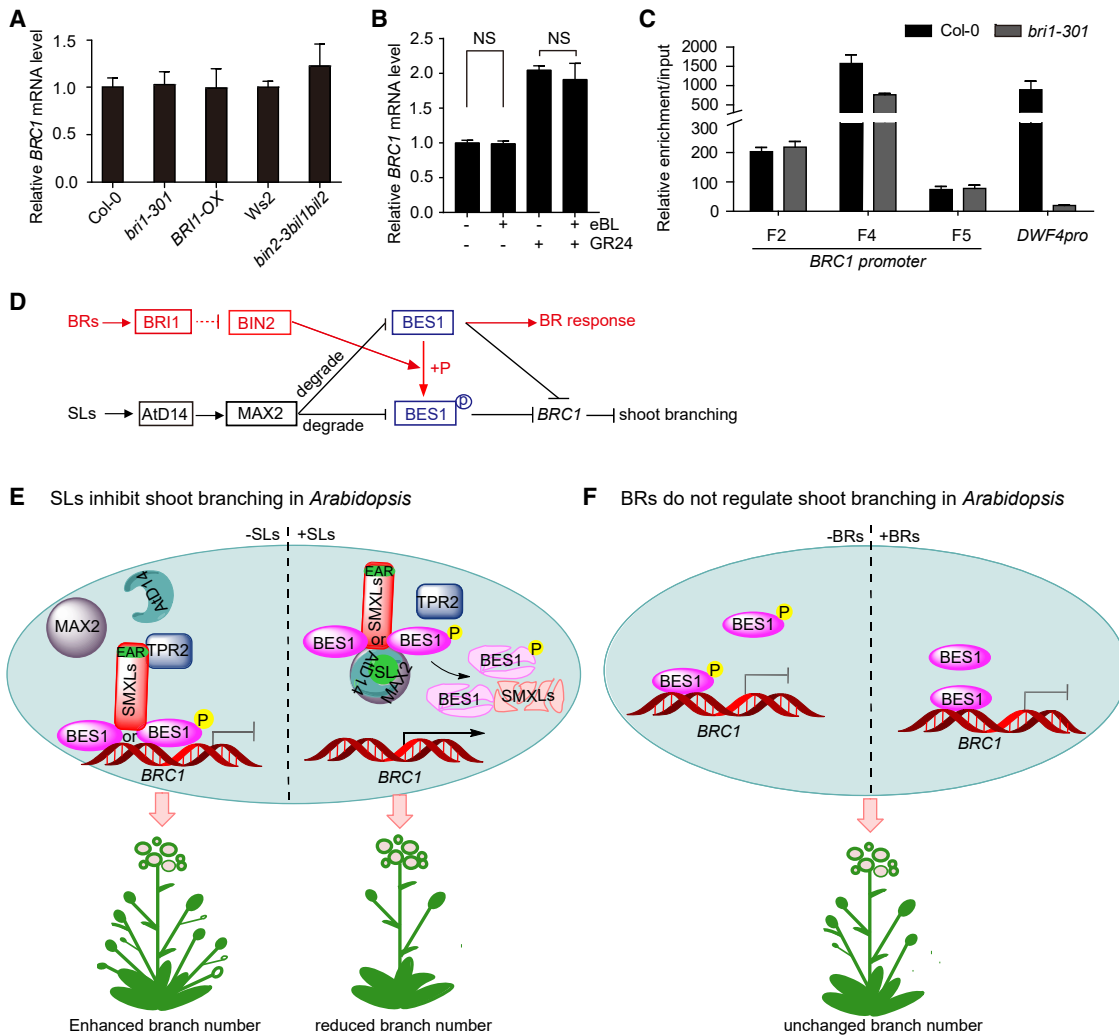

**Figure 4. BES1 Functions Independently in SL and BR Signaling in Arabidopsis.**

(A) Relative *BRC1* expression levels in the BR-related materials *bri301*, *BRI1-OX*, and *bin2-3bil1bil2*. (B) The transcription level of *BRC1* in isolated buds of Col-0 treated with mock, 5  $\mu$ M eBL, 5  $\mu$ M GR24, and 5  $\mu$ M eBL plus 5  $\mu$ M GR24 for 3 h, respectively. (C) The ChIP-qPCR assays of the *BRC1* and *DWF4* promoters precipitated by BES1 in Col-0 and *bri1-301* plants using anti-BES1 antibody. Fold enrichment compared with the *ACTIN* promoter was normalized to their input. (D) The model indicates that BES1 functions independently in SL and BR signaling in *Arabidopsis*. The alteration in the BES1 phosphorylation status by BR signaling has no effect on *BRC1* expression in shoot branching, while SL signaling regulates *BRC1* expression to inhibit shoot branching through degrading both phosphorylated and dephosphorylated BES1. (E and F) Working models of the SL- and BR-mediated regulation of shoot branching in *Arabidopsis*. In *Arabidopsis*, when SLs are absent, D53-like SMXLs interact with phosphorylated or unphosphorylated BES1 to inhibit *BRC1* expression, via direct binding of BES1 to its promoter, and the EAR motif of D53-like SMXLs recruiting TPR2, leading to enhanced shoot branch number. When SLs are present, the D53-like SMXLs-BES1 complex is degraded by AtD14-MAX2 after SLs perception, resulting in the expression of *BRC1* to inhibit shoot branching (E). In *Arabidopsis*, the phosphorylation status change caused by BRs has no effect on *BRC1* expression or shoot branching (F). Data are means  $\pm$  SD ( $n = 3$ ) and  $P$  values in (B) were determined by Student's  $t$ -test; non-significant (NS),  $P > 0.05$ . See also Supplemental Figures 4 and 10.

network in the buds through the local transcription factor *BRC1* for shoot branching in *Arabidopsis*. First, the genome-wide transcriptomes and genetic analysis using the SL signaling-related plant materials, suggest that BES1- and D53-like SMXLs interdependently trigger an SL-induced transcriptional network for shoot branching mainly through *BRC1*. Second, we demonstrate that BES1 interacts with D53-like SMXLs to inhibit *BRC1* expression, which is dependent on both the direct DNA binding by BES1 and the transcriptional inhibition by the EAR motif of

D53-like SMXLs. Third, we reveal that BES1 functions independently in SL and BR signaling in *Arabidopsis*. Therefore, these data reveal a transcriptional regulation mechanism in the SL-controlled shoot branching via AtD14-MAX2-D53-like SMXLs-BES1-BRC1.

Our genetic and molecular results support the mechanism of how SL signaling directly inhibits *BRC1* expression to specifically inhibit bud outgrowth in *Arabidopsis*. In many

## Plant Communications

species, the TCP transcription factor *BRC1* and its homologs are proposed to be key switches to regulate bud outgrowth by coordinating diverse environmental and developmental cues (Doebley et al., 1995; Lewis et al., 2008; Martintrillo et al., 2011; Dun et al., 2012; Gonzalez-Grandio et al., 2013; Mason et al., 2014; Holalu and Finlayson, 2017). However, the lack of a molecular mechanism by which *BRC1* regulates shoot branching means that it has long been controversial whether *BRC1* expression is necessary and sufficient for the inhibition of bud outgrowth (Seale and Bennett, 2017). A few studies support the important roles of *BRC1* in SL-regulated shoot branching. For instance, the branching number of *brc1* is ascribed to rosette branching, but not cauline branching (Aguilar-Martinez et al., 2007), which is consistent with the branching phenotype of the SL-related mutants (Liang et al., 2016); and the expression of *BRC1* is also altered in the SL signaling mutants (Zhou et al., 2013; Chevalier et al., 2014; Wang et al., 2015). In addition, in pea and rice, *Psbrc1/Osfc1* mutants are insensitive to GR24 treatment and genetically function downstream of SL signaling to inhibit branching (or tillering in rice) (Aguilar-Martinez et al., 2007; Braun et al., 2012; Dun et al., 2012; Guan et al., 2012; Lu et al., 2013). In this study, first, our genetic and molecular results support that BES1 may directly control *BRC1* expression depending on D53-like SMXLs to promote bud outgrowth in *Arabidopsis* (Figure 1). Second, biochemical studies demonstrate that the D53-like SMXLs–BES1 module directly regulates *BRC1* expression via DNA binding by BES1 and transcriptional inhibition by the EAR motif of D53-like SMXLs (Figures 1 and 3 and Supplemental Figures 4, 7, and 8). Therefore, our study demonstrates that *BRC1*, as the SL signaling target, is directly regulated by BES1–SMXLs to inhibit bud outgrowth in *Arabidopsis*.

We also provide significant insights into how BES1, a component shared by SL and BR signaling pathways, differentially regulates signaling-specific biological processes in *Arabidopsis*. As a positive component in BR signaling and a key transcription factor directly regulating BR-responsive gene expression (Yin et al., 2005), BES1 regulates BR signaling outputs in *Arabidopsis* through switching between phosphorylated and dephosphorylated forms to alter its DNA binding and transcription activity (Yang and Wang, 2017; Yin et al., 2002). Recent studies demonstrate that the stability of BES1 is not primarily regulated by BR signaling in *Arabidopsis* (Jiang et al., 2015; Yang et al., 2017; Yang and Wang, 2017). While in the SL signaling pathway, both the phosphorylated and dephosphorylated forms of BES1 can interact with D53-like SMXLs (Figure 2), and can be induced to be degraded by MAX2 in response to SLs (Wang et al., 2013), indicating that the regulation of BES1 stability is a major mechanism in SL signaling. The differential regulation of BES1 by the two signals indicates that BES1 independently functions in the BR and SL signaling pathways to control different development processes in *Arabidopsis* (Figure 4D). Consistent with this hypothesis, mutants of the BR signaling components upstream of BES1 have similar branching number (Wang et al., 2013) and similar expression level of *BRC1* (Figure 4A) compared with wild type in *Arabidopsis*; and BR treatment has no effect on *BRC1* expression in buds and on the interaction between BES1- and D53-like SMXLs (Figure 4B

## BES1–SMXLs Inhibit *BRC1* Expression in Branching

and Supplemental Figure 6). Furthermore, the altered phosphorylation status of BES1 cannot affect its ability binding to the *BRC1* promoter (Figure 4C). These results all support the conclusion that BES1 independently functions in SL and BR signaling to trigger the signal-specific gene expression (Figure 4D).

In addition, a number of genetic data strengthen our conclusion that BES1 and its homologs play an important role in regulating shoot branching in *Arabidopsis*. In *Arabidopsis*, BES1 has five homologous genes, BZR1 and BEH1-4. BES1 and its homologs have been reported to work redundantly in BR signaling (Chen et al., 2019; Yin et al., 2005). In addition, it is also known that the homologous genes of *BES1* in *Arabidopsis* are redundant in SL signaling, because *BES1* and its homologs are able to interact with MAX2 (Wang et al., 2013) and the D53-like SMXLs (Figure 2 and Supplemental Figure 5). Thus, the *BES1-RNAi* line, with the reduced expression of *BES1* and its homologous genes, displays reduced rosette branching number (Wang et al., 2013) (Figure 1E and 1F and Supplemental Figure 2), and suppresses the branching phenotype of *max2-1* (Wang et al., 2013), which well explained why a T-DNA-insertion line, *bes1-1*, which has abolishes BES1 expression, exhibiting a slightly reduced rosette branches and similar cauline branches compared with that in Col-0 (Bennett et al., 2016). In addition, the *bes1-D* mutant line in En2 background and the transgenic lines, by expressing *bes1-D* in the Col-0 background, all exhibited the BR-enhanced phenotypes similar to plants overproducing BRs or *BRI1* (Yin et al., 2002), also presented the more branching number than wild-type control in *Arabidopsis* (Figure 1C, Supplemental Figure 2 and Wang et al., 2013). In this study, the branching phenotype of more independent transgenic lines, including *bes1-D* and *BES1-RNAi* (Supplemental Figure 2) further supported the function of BES1 in shoot branching. In addition, in a parallel study, we demonstrated that the *OsBZR1-RNAi* line (the homolog of *BES1* in rice) also exhibits the reduced tiller number, and rescues the tillering phenotype of *d14*, *d3*, and *d53* in rice; we also demonstrated that the *OsBZR1:Osizr1-D* transgenic rice had more tillers than the wild-type Nipponbare. Taken together, these results suggest that the function of *AtBES1/OsBZR1* in shoot branching is general and conserved in *Arabidopsis* and rice.

Therefore, we propose a molecular mechanism how the SL signal is transduced to trigger the transcriptional network in *Arabidopsis* buds (Figure 4E and 4F). When SLs are insufficient, D53-like SMXLs and BES1, the direct substrates of D14–MAX2, are accumulated, and interact with each other to bind the *BRC1* promoter via BES1, which inhibits *BRC1* expression by the EAR motif of D53-like SMXLs to increase shoot branching; when SLs are sufficient, BES1 and D53-like SMXLs are all ubiquitinated and induced to be degraded by AtD14–MAX2 complex in buds, which relieves the inhibition of *BRC1* expression to inhibit bud outgrowth (Figure 4E). Whereas, the alteration between phosphorylated and dephosphorylated BES1s induced by BR signaling has no effect on the *BRC1* expression, and does not change the branch number in *Arabidopsis* (Figure 4F). Therefore, multiple mechanisms have been evolved in regulating BES1 for



decoding distinct developmental and environmental cues in plants.

## METHODS

### Plant Materials

The *Arabidopsis thaliana* mutant alleles used in this study were: *brc1* (SALK\_091920C) (Aguilar-Martinez et al., 2007), *BES1-RNAi* (Yin et al., 2005), *smxl6* (CS847925/SAIL\_1285\_H05), *smxl7* (SALK\_082032), *smxl8* (SALK\_126406) (described in Wang et al., 2015), *Atd14-1* mutant (isolated from the Wisconsin DsLox T-DNA insertion collection [CS913109 (N913109)]) (Waters et al., 2012; Vegh et al., 2017), and *max2-1* (SALK\_092836). All were in the Col-0 background, as well as the *brc1smxl6/7/8*, *brc1BES1-RNAi* mutants, and the 35S:*BES1-FLAG*, *SMXL7-D-GFP*, *SMXL7-D-GFPBES1-RNAi*, *SMXL7-D-mEAR-GFP*, and *MAX2:bes1-D smxl6/7/8* transgenic plants. Surface-sterilized seeds were sown on 0.8% agar plates containing Murashige and Skoog (MS) medium. Plates were kept in darkness for 2–3 days, and then placed at 22°C under light conditions (16-h light/8-h dark long-day). Primers used for genotyping of these mutants were listed in Supplemental Table 7.

### Construction of Transgenic Lines

The *Arabidopsis* quadruple mutant *brc1smxl6/7/8* was generated from a cross between homozygous *brc1* and the triple mutant *smxl6/7/8*, and identified from F2 lines. *brc1BES1-RNAi* was also obtained from their F2 progeny. Genotyping of the *brc1*, *smxl6*, *smxl7*, and *smxl8* mutants was performed by PCR. For *Arabidopsis*, constructs used to generate transgenic plants were *pCAMBIA 1300* with different tags, including *SMXL7-D-GFP*, *SMXL7-D-GFP*, *SMXL7-D-mEAR-GFP*, and *MAX2:bes1-D*. The genomic DNA fragment of *SMXL7*, including the promoter region and the transcription region without the stop codon by overlapping PCR (using primer *SMXL7pro* and *SMXL7-R* listed in Supplemental Table 7), was fused in-frame to the 5' end of *GFP*. *SMXL7-D* was constructed by overlapping PCR (using primer overlapping-*SMXL7-D-F2/R2* listed in Supplemental Table 7) according to the 15-bp deletion of D53 in rice and *SMXL7* in *Arabidopsis*, and resulted in substitution of the amino acids RGKGTGI with a single threonine residue (Jiang et al., 2013; Soundappan et al., 2015; Wang et al., 2015; Zhou et al., 2013), which was also fused to the 5' end of *GFP* with its promoter. *SMXL7-D-mEAR* was constructed based on plasmid *SMXL7-D* by overlapping PCR (using primer overlapping-*SMXL7-mEAR-F2/R2* listed in Supplemental Table 7) according to the previous study (Liang et al., 2016). *BES1* was amplified using primer *BES1-F/R* (Supplemental Table 7) to construct *MAX2:bes1-D-FLAG* and *35S-BES1-cYFP*, and primer *BES1-L-F/BES1-R* (Supplemental Table 7) to construct *35S:BES1-L-D-mCherry*. Genomic *BES1* was amplified using *BES1pro-F* and *BES1-R* (Supplemental Table 7). Mutated-form *bes1-D* was obtained by overlapping PCR (using primer overlapping-*bes1-D-F/R* listed in Supplemental Table 7) according to a previous study (Yin et al., 2002). *pBES1-L:GUS* and *pBES1-S:GUS* transgenic lines were used in this paper (Jiang et al., 2015). Constructs were then transfected into Col-0, *BES1-RNAi*, or *smxl6/7/8* by agroinfiltration using the floral dip method (Clough and Bent, 1998). T<sub>3</sub> homozygous lines were generated and analyzed for each construct. Primers are listed in Supplemental Table 7.

### BiFC, LUC Reporter Assay, and Dual Bioluminescence Assay

For BiFC assays, the full-length coding sequence of each *D53-like SMXLs*, fused with N-terminal *YFP*, was cloned into *PXY106* vectors. *BES1* and its homologous genes, fused with C-terminal *YFP*, were constructed into *PXY104* using the Seamless cloning/in-fusion cloning system. For the LUC reporter assay, the *BRC1* promoter (2067 bp length upstream from ATG) and its first exon was constructed into *pCAMBIA1300*, with *LUC* as the reporter, and *35S* promoter-linked *LUC* genes as the control reporter. For the effector *SMXL7-D*, *SMXL7-mEAR* was constructed into *pCAMBIA1300* under the control of a *35S* promoter and fused to the 5'

end of the *GFP* gene, mutated-form *SMXL7-D* and *SMXL7-D-mEAR* were constructed as above (described in part construction of transgenic lines), based on the coding sequence of *SMXL7* which was amplified using primer *SMXL7-F/R* (Supplemental Table 7). *MAX2:bes1-D* was same as the plasmid used to construct the transgenic plant *MAX2:bes1-D-FLAG/Col-0*. Empty plasmid *pCAMBIA1300* with *GFP* genes under a *35S* promoter was used as the control effector.

For dual bioluminescence assays, the *BRC1* promoter (2067 bp length with ATG) controlling the *LUC* reporter gene was constructed into *pGreenII 0800-LUC*, linked to a *35S* promoter regulating the *renilla* (*REN*) reporter gene, which was used as the reference. The effectors *35S:SMXL7-D-GFP*, *35S:SMXL7-mEAR-GFP*, and *MAX2:bes1-D-FLAG* were constructed in the same way as in the *LUC* reporter assay. Primers are listed in Supplemental Table 7. *Agrobacterium* strain GV3101 was transformed with the above vector, then injected into young leaves of *N. benthamiana*. Plants were grown in the dark for 1 day, then transferred to long-day conditions (16 h light/8 h dark) for 2 days. Fluorescence signals in pavement cells were observed with confocal microscopy (Leica SP8). For the luciferase reporter assay, 2 mM luciferin was used to observe the fluorescence using a CCD system (LUMAZONE PYLON2048B). For dual bioluminescence assay, the fluorescence of *LUC* and *REN* were detected using the Dual-Luciferase Report Assay System by Mithras LB940.

### In Vitro Pull-Down Assay

The coding sequence of each gene in the *D53-like SMXLs* family was cloned into *pGEX-4T-1* to obtain GST-*SMXLs* recombinant proteins. Primers are listed in Supplemental Table 7. GST fusion proteins and MBP fusion proteins were purified using glutathione beads (GenScript), and amylose resin (NEB), respectively. Glutathione beads containing GST or GST-*SMXLs* were incubated with MBP, MBP-*BES1* in 1 × PBS at 4°C for 2 h. Beads were washed 8–10 times with wash buffer (1 × PBS, 0.1% Triton X-100) and boiled with 1 × SDS loading buffer at 95°C for 5–10 min, separated by SDS-PAGE, and immunoblotted with anti-MBP antibodies (produced in our lab by rabbits immunized with full-length MBP protein).

### Semi-in Vivo Pull-Down Assay

Semi-*in vivo* pull-down assays were performed using *35S:BES1-FLAG* transgenic plants, which were grown on 1/2 MS medium for 15 days. Plant materials were ground to powder in liquid nitrogen and solubilized with 2 × protein extraction buffer (100 mM Tris-HCl [pH 7.5], 300 mM NaCl, 2 mM EDTA [pH 8.0], 1% Triton X-100, 10% glycerol, and protease inhibitor). Extracts were centrifuged twice at 12 000 rpm for 10 min, and the resulting supernatants were collected and incubated with either GST or GST-*SMXLs* pre-incubated GST beads at 4°C for 2 h. Beads were washed about five times with wash buffer, and then boiled with 1 × SDS loading buffer at 95°C for 5–10 min, separated by SDS-PAGE, and immunoblotted with anti-FLAG antibodies.

### RT-PCR and RNA Sequencing

Rosette buds ≤ 3 mm were excised from different plants, which were about 5–10 cm high with only one main branch. Excised buds were immediately put into liquid nitrogen, then collected for RNA extraction. Total RNA was prepared using a plant total RNA extraction kit (TIANGEN), according to the users' manual. For qRT-PCR, RNA samples were reverse transcribed using a first-strand cDNA synthesis kit (Takara) and oligo(dT). Real-time PCR experiments were performed using gene-specific primers (Supplemental Table 7) on a CFX 96 real-time PCR detection system (Bio-Rad) in a total volume of 10 μl containing 2 μl diluted cDNA, 0.3 mM gene-specific primers, and 5 μl SYBR Green Supermix (Bio-Rad). The *Arabidopsis U-box* gene was used as the internal control. RNA samples were sent to the Beijing Genomics Institute for RNA sequencing (RNA-seq). The RNA-seq data that support the findings of this study are available.

## Plant Communications

### ChIP

Using the method published by [Fiil et al. \(2008\)](#), Col-0 and *BES1-FLAG* seedlings of about 2–3-weeks-old or buds with junction of shoot and root of Col-0, *smx16/7/8*, *SMXL7-D-GFP/Col-0*, and *SMXL7-D-GFP/BES1-RNAi* lines were harvested with Fix Buffer (0.4 M sucrose, 10 mM Tris-HCl [pH 8.0], 1 mM EDTA, 1 mM PMSF, 1.0% formaldehyde). Seedlings were vacuum-infiltrated for 30 min for crosslinking. Anti-FLAG gels, anti-GFP gels (40  $\mu$ l) or endogenous anti-BES1 antibody (needed to pre-clear the chromatin sample using 100–200  $\mu$ l protein A resin) was used for immunoprecipitation of BES1–DNA complex. Regarding anti-FLAG and anti-GFP gels, chromatin was incubated with gels at 4°C overnight using a rotating mixer wheel before collected. While, as for anti-AtBES1 antibody, after being rotated at 4°C overnight, 40  $\mu$ l of protein A resin was added and rotated at 4°C for 3 h to collect the BES1–DNA complex. Finally, DNA was isolated by phenol:chloroform. Finally, 50  $\mu$ l of Milli-Q water was added to dissolve the pellet DNA.

### EMSA

The amplified coding sequences of *BES1* were fused in-frame with *MBP* tags and transformed into *Escherichia coli*. BES1-MBP recombinant proteins were purified. MBP was purified as the control. Recombinant proteins were then incubated with biotin-labeled probes, or with corresponding unlabeled probes for 30 min in EMSA-binding buffer (Thermo Fisher Scientific). Reaction mixtures were separated by non-denaturing polyacrylamide. DNA signals were detected by chemiluminescence.

### Quantification and Statistical Analysis

qRT-PCR data were collected using Bio-Rad real-time PCR detection systems. These data were assumed to follow normal distributions and were subjected to one-tailed or two-tailed Student's *t*-tests according to F-test results. Statistical tests were performed in Microsoft Excel 2016. Statistical parameters, including the exact value of *n*, the precision measures (mean  $\pm$  SD) or (mean  $\pm$  SE) and statistical significance, can be found in the figure legends. Here, *n* means number of plants for phenotypic analysis, or numbers of technical replicates for qRT-PCR. In Figures, asterisks denote statistical significance test (\*\**P* < 0.001, \**P* < 0.01, \**P* < 0.05, non-significant [NS], *P* > 0.05) compared with the corresponding controls, unless otherwise specified by lines connecting the compared pieces of data.

### SUPPLEMENTAL INFORMATION

Supplemental Information is available at *Plant Communications Online*.

### FUNDING

Supported by NSFC 31430046 (to X.W.), 31661143024 (to X.W.), National Key Research and Development Plan 2016YFD0100403 (to S.S.), the Ministry of Agriculture Innovation team plan (0120150092 to X.W.), the School Independent Scientific and Technological Innovation Foundation and Research Startup Foundation of Huazhong Agricultural University (2662015PY020 and 2014RC002 to X.W.).

### AUTHOR CONTRIBUTIONS

X.W., S.S., and J.H. designed the experiments and wrote the manuscript. J.H., Y.J., and X.H. performed the experiments and analyzed the data.

### ACKNOWLEDGMENTS

We thank J.Y. Li (Institute of Genetics and Developmental Biology, Chinese Academy of Sciences) for providing the mutants *smx16/7/8*. No conflict of interest declared.

Received: November 1, 2019

Revised: December 5, 2019

Accepted: December 8, 2019

Published: December 12, 2019

## BES1–SMXLs Inhibit *BRC1* Expression in Branching

### REFERENCES

- [Aguilar-Martinez, J.A., Poza-Carrion, C., and Cubas, P. \(2007\).](#) *Arabidopsis* BRANCHED1 acts as an integrator of branching signals within axillary buds. *Plant Cell* **19**:458–472.
- [Akiyama, K., Matsuzaki, K., and Hayashi, H. \(2005\).](#) Plant sesquiterpenes induce hyphal branching in arbuscular mycorrhizal fungi. *Nature* **435**:824–827.
- [Al-Babili, S., and Bouwmeester, H.J. \(2015\).](#) Strigolactones, a novel carotenoid-derived plant hormone. *Annu. Rev. Plant Biol.* **66**:161–186.
- [Arite, T., Umehara, M., Ishikawa, S., Hanada, A., Maekawa, M., Yamaguchi, S., and Kyojuka, J. \(2009\).](#) d14, a strigolactone-insensitive mutant of rice, shows an accelerated outgrowth of tillers. *Plant Cell Physiol.* **50**:1416–1424.
- [Bennett, T., Liang, Y., Seale, M., Ward, S., Muller, D., and Leyser, O. \(2016\).](#) Strigolactone regulates shoot development through a core signalling pathway. *Biol. Open* **5**:1806–1820.
- [Beveridge, C.A., and Kyojuka, J. \(2010\).](#) New genes in the strigolactone-related shoot branching pathway. *Curr. Opin. Plant Biol.* **13**:34–39.
- [Braun, N., de Saint Germain, A., Pillot, J.P., Boutet-Mercey, S., Dalmais, M., Antoniadi, I., Li, X., Maia-Grondard, A., Le Signor, C., Bouteiller, N., et al. \(2012\).](#) The pea TCP transcription factor PsBRC1 acts downstream of strigolactones to control shoot branching. *Plant Physiol.* **158**:225–238.
- [Chen, L.-G., Gao, Z., Zhao, Z., et al. \(2019\).](#) BZR1 family transcription factors function redundantly and indispensably in BR signaling but exhibit BRI1-independent function in regulating anther development in *Arabidopsis*. *Mol. Plant* **12**:1408–1415.
- [Chevalier, F., Nieminen, K., Sanchez-Ferrero, J.C., Rodriguez, M.L., Chagoyen, M., Hardtke, C.S., and Cubas, P. \(2014\).](#) Strigolactone promotes degradation of DWARF14, an alpha/beta hydrolase essential for strigolactone signaling in *Arabidopsis*. *Plant Cell* **26**:1134–1150.
- [Choi, M.S., Woo, M.O., Koh, E.B., Lee, J., Ham, T.H., Seo, H.S., and Koh, H.J. \(2012\).](#) Teosinte Branched 1 modulates tillering in rice plants. *Plant Cell Rep.* **31**:57–65.
- [Clough, S.J., and Bent, A.F. \(1998\).](#) Floral dip: a simplified method for *Agrobacterium*-mediated transformation of *Arabidopsis thaliana*. *Plant J.* **16**:735–743.
- [Cook, C.E., Whichard, L.P., Turner, B., Wall, M.E., and Egley, G.H. \(1966\).](#) Germination of witchweed (*Striga lutea* Lour.): isolation and properties of a potent stimulant. *Science* **154**:1189–1190.
- [De Saint Germain, A., Clave, G., Badet-Denisot, M.A., Pillot, J.P., Cornu, D., Le Caer, J.P., Burger, M., Pelissier, F., Retailleau, P., Turnbull, C., et al. \(2016\).](#) An histidine covalent receptor and butenolide complex mediates strigolactone perception. *Nat. Chem. Biol.* **12**:787–794.
- [Doebley, J., Stec, A., and Gustus, C. \(1995\).](#) *teosinte* branched1 and the origin of maize: evidence for epistasis and the evolution of dominance. *Genetics* **141**:333–346.
- [Domagalska, M.A., and Leyser, O. \(2011\).](#) Signal integration in the control of shoot branching. *Nat. Rev. Mol. Cell Biol.* **12**:211–221.
- [Dong, G., Ma, D.P., and Li, J. \(2008\).](#) The histone methyltransferase SDG8 regulates shoot branching in *Arabidopsis*. *Biochem. Biophys. Res. Commun.* **373**:659–664.
- [Dun, E.A., de Saint Germain, A., Rameau, C., and Beveridge, C.A. \(2012\).](#) Antagonistic action of strigolactone and cytokinin in bud outgrowth control. *Plant Physiol.* **158**:487–498.
- [Dun, E.A., de Saint Germain, A., Rameau, C., and Beveridge, C.A. \(2013\).](#) Dynamics of strigolactone function and shoot branching responses in *Pisum sativum*. *Mol. Plant* **6**:128–140.

- Fiil, B.K., Qiu, J.L., Petersen, K., Petersen, M., and Mundy, J. (2008). Coimmunoprecipitation (co-IP) of nuclear proteins and chromatin immunoprecipitation (ChIP) from *Arabidopsis*. CSH Protoc. 2008. <https://doi.org/10.1101/pdb.prot5049>.
- Gomez-Roldan, V., Fermas, S., Brewer, P.B., Puech-Pages, V., Dun, E.A., Pillot, J.P., Letisse, F., Matusova, R., Danoun, S., Portais, J.C., et al. (2008). Strigolactone inhibition of shoot branching. *Nature* 455:189–194.
- Gonzalez-Grandio, E., Poza-Carrion, C., Sorzano, C.O., and Cubas, P. (2013). BRANCHED1 promotes axillary bud dormancy in response to shade in *Arabidopsis*. *Plant Cell* 25:834–850.
- Gonzalez-Grandio, E., Pajoro, A., Franco-Zorrilla, J.M., Tarancon, C., Immink, R.G., and Cubas, P. (2017). Abscisic acid signaling is controlled by a BRANCHED1/HD-ZIP I cascade in *Arabidopsis* axillary buds. *Proc. Natl. Acad. Sci. U S A* 114:E245–E254.
- Guan, J.C., Koch, K.E., Suzuki, M., Wu, S., Latshaw, S., Petrucci, T., Goulet, C., Klee, H.J., and McCarty, D.R. (2012). Diverse roles of strigolactone signaling in maize architecture and the uncoupling of a branching-specific subnetwork. *Plant Physiol.* 160:1303–1317.
- He, J.X., Gendron, J.M., Yang, Y., Li, J., and Wang, Z.Y. (2002). The GSK3-like kinase BIN2 phosphorylates and destabilizes BZR1, a positive regulator of the brassinosteroid signaling pathway in *Arabidopsis*. *Proc. Natl. Acad. Sci. U S A* 99:10185–10190.
- He, J.X., Gendron, J.M., Sun, Y., Gampala, S.S., Gendron, N., Sun, C.Q., and Wang, Z.Y. (2005). BZR1 is a transcriptional repressor with dual roles in brassinosteroid homeostasis and growth responses. *Science* 307:1634–1638.
- Holalu, S.V., and Finlayson, S.A. (2017). The ratio of red light to far red light alters *Arabidopsis* axillary bud growth and abscisic acid signalling before stem auxin changes. *J. Exp. Bot.* 68:943–952.
- Hwang, I., and Sheen, J. (2001). Two-component circuitry in *Arabidopsis* cytokinin signal transduction. *Nature* 413:383–389.
- Jiang, L., Liu, X., Xiong, G., Liu, H., Chen, F., Wang, L., Meng, X., Liu, G., Yu, H., Yuan, Y., et al. (2013). DWARF 53 acts as a repressor of strigolactone signalling in rice. *Nature* 504:401–405.
- Jiang, J., Zhang, C., and Wang, X. (2015). A recently evolved isoform of the transcription factor BES1 promotes brassinosteroid signaling and development in *Arabidopsis thaliana*. *Plant Cell* 27:361–374.
- Kagale, S., and Rozwadowski, K. (2011). EAR motif-mediated transcriptional repression in plants: an underlying mechanism for epigenetic regulation of gene expression. *Epigenetics* 6:141–146.
- Ke, J., Ma, H., Gu, X., Thelen, A., Brunzelle, J.S., Li, J., Xu, H.E., and Melcher, K. (2015). Structural basis for recognition of diverse transcriptional repressors by the TOPLESS family of corepressors. *Sci. Adv.* 1:e1500107.
- Lewis, J.M., Mackintosh, C.A., Shin, S., Gilding, E., Kravchenko, S., Baldrige, G., Zeyen, R., and Muehlbauer, G.J. (2008). Overexpression of the maize Teosinte Branched1 gene in wheat suppresses tiller development. *Plant Cell Rep.* 27:1217–1225.
- Liang, Y., Ward, S., Li, P., Bennett, T., and Leyser, O. (2016). SMAX1-LIKE7 signals from the nucleus to regulate shoot development in *Arabidopsis* via partially EAR motif-independent mechanisms. *Plant Cell* 28:1581–1601.
- Lu, Z., Yu, H., Xiong, G., Wang, J., Jiao, Y., Liu, G., Jing, Y., Meng, X., Hu, X., Qian, Q., et al. (2013). Genome-wide binding analysis of the transcription activator ideal plant architecture1 reveals a complex network regulating rice plant architecture. *Plant Cell* 25:3743–3759.
- Ma, H., Duan, J., Ke, J., He, Y., Gu, X., Xu, T.H., Yu, H., Wang, Y., Brunzelle, J.S., and Jiang, Y. (2017). A D53 repression motif induces oligomerization of TOPLESS corepressors and promotes assembly of a corepressor-nucleosome complex. *Sci. Adv.* 3. <https://doi.org/10.1126/sciadv.1601217>.
- Martíntrillo, M., Grandio, E.G., Serra, F., Marcel, F., Rodríguezbuey, M.L., Schmitz, G., Theres, K., Bendahmane, A., Dopazo, H., and Cubas, P. (2011). Role of tomato BRANCHED1-like genes in the control of shoot branching. *Plant J.* 67:701–714.
- Mason, M.G., Ross, J.J., Babst, B.A., Wienclaw, B.N., and Beveridge, C.A. (2014). Sugar demand, not auxin, is the initial regulator of apical dominance. *Proc. Natl. Acad. Sci. U S A* 111:6092–6097.
- Nakamura, H., Xue, Y.L., Miyakawa, T., Hou, F., Qin, H.M., Fukui, K., Shi, X., Ito, E., Ito, S., and Park, S.H. (2013). Molecular mechanism of strigolactone perception by DWARF14. *Nat. Commun.* 4:2613.
- Pinkston-Gosse, J., and Kenyon, C. (2007). DAF-16/FOXO targets genes that regulate tumor growth in *Caenorhabditis elegans*. *Nat. Genet.* 39:1403–1409.
- Seale, M., and Bennett, T. (2017). BRC1 expression regulates bud activation potential but is not necessary or sufficient for bud growth inhibition in *Arabidopsis*. *Development* 144:1661–1673.
- Shabek, N., Ticchiarrelli, F., Mao, H., Hinds, T.R., Leyser, O., and Zheng, N. (2018). Structural plasticity of D3-D14 ubiquitin ligase in strigolactone signalling. *Nature* 563:652–656.
- Smit, P., Raedts, J., Portyanko, V., Debelle, F., Gough, C., Bisseling, T., and Geurts, R. (2005). NSP1 of the GRAS protein family is essential for rhizobial Nod factor-induced transcription. *Science* 308:1789–1791.
- Song, X., Lu, Z., Hong, Y., Shao, G., Xiong, J., Meng, X., Jing, Y., Liu, G., Xiong, G., and Duan, J. (2017). IPA1 functions as a downstream transcription factor repressed by D53 in strigolactone signaling in rice. *Cell Res.* 27:1128–1141.
- Soundappan, I., Bennett, T., Morffy, N., Liang, Y., Stanga, J.P., Abbas, A., Leyser, O., and Nelson, D.C. (2015). SMAX1-LIKE/D53 family members enable distinct MAX2-dependent responses to strigolactones and karrikins in *Arabidopsis*. *Plant Cell* 27:3143–3159.
- Stanga, J.P., Smith, S.M., Briggs, W.R., and Nelson, D.C. (2013). SUPPRESSOR OF MORE AXILLARY GROWTH2 1 controls seed germination and seedling development in *Arabidopsis*. *Plant Physiol.* 163:318–330.
- Stanga, J.P., Morffy, N., and Nelson, D.C. (2016). Functional redundancy in the control of seedling growth by the karrikin signaling pathway. *Planta* 243:1397–1406.
- Sun, Y., Fan, X.Y., Cao, D.M., Tang, W., He, K., Zhu, J.Y., He, J.X., Bai, M.Y., Zhu, S., and Oh, E. (2010). Integration of brassinosteroid signal transduction with the transcription network for plant growth regulation in *Arabidopsis*. *Dev. Cell* 19:765–777.
- Tang, W., Yuan, M., Wang, R., Yang, Y., Wang, C., Oses-Prieto, J.A., Kim, T.W., Zhou, H.W., Deng, Z., Gampala, S.S., et al. (2011). PP2A activates brassinosteroid-responsive gene expression and plant growth by dephosphorylating BZR1. *Nat. Cell Biol.* 13:124–131.
- Tognetti, V.B., Van Aken, O., Morreel, K., Vandenbroucke, K., van de Cotte, B., De Clercq, I., Chiwocha, S., Fenske, R., Prinsen, E., Boerjan, W., et al. (2010). Perturbation of indole-3-butyric acid homeostasis by the UDP-glucosyltransferase UGT74E2 modulates *Arabidopsis* architecture and water stress tolerance. *Plant Cell* 22:2660–2679.
- Umehara, M., Hanada, A., Yoshida, S., Akiyama, K., Arite, T., Takeda-Kamiya, N., Magome, H., Kamiya, Y., Shirasu, K., Yoneyama, K., et al. (2008). Inhibition of shoot branching by new terpenoid plant hormones. *Nature* 455:195–200.
- Valverde, F., Mouradov, A., Soppe, W., Ravenscroft, D., Samach, A., and Coupland, G. (2004). Photoreceptor regulation of CONSTANS protein in photoperiodic flowering. *Science* 303:1003–1006.
- Vegh, A., Incze, N., Fabian, A., Huo, H., Bradford, K.J., Balazs, E., and Soos, V. (2017). Comprehensive analysis of DWARF14-LIKE2 (DLK2)

## Plant Communications

reveals its functional divergence from strigolactone-related paralogs. *Front. Plant Sci.* **8**:1641.

**Wallner, E.S., Lopez-Salmeron, V., Belevich, I., Poschet, G., Jung, I., Grunwald, K., Sevillem, I., Jokitalo, E., Hell, R., Helariutta, Y., et al.** (2017). Strigolactone- and karrikin-independent SMXL proteins are central regulators of phloem formation. *Curr. Biol.* **27**:1241–1247.

**Wang, Y., Sun, S., Zhu, W., Jia, K., Yang, H., and Wang, X.** (2013). Strigolactone/MAX2-induced degradation of brassinosteroid transcriptional effector BES1 regulates shoot branching. *Dev. Cell* **27**:681–688.

**Wang, L., Wang, B., Jiang, L., Liu, X., Li, X., Lu, Z., Meng, X., Wang, Y., Smith, S.M., and Li, J.** (2015). Strigolactone signaling in *Arabidopsis* regulates shoot development by targeting D53-like SMXL repressor proteins for ubiquitination and degradation. *Plant Cell* **27**:3128–3142.

**Waters, M.T., Nelson, D.C., Scaffidi, A., Flematti, G.R., Sun, Y.K., Dixon, K.W., and Smith, S.M.** (2012). Specialisation within the DWARF14 protein family confers distinct responses to karrikins and strigolactones in *Arabidopsis*. *Development* **139**:1285–1295.

## BES1–SMXLs Inhibit *BRC1* Expression in Branching

**Yang, M., and Wang, X.** (2017). Multiple ways of BES1/BZR1 degradation to decode distinct developmental and environmental cues in plants. *Mol. Plant* **10**:915–917.

**Yang, M., Li, C., Cai, Z., Hu, Y., Nolan, T., Yu, F., Yin, Y., Xie, Q., Tang, G., and Wang, X.** (2017). SINAT E3 ligases control the light-mediated stability of the brassinosteroid-activated transcription factor BES1 in *Arabidopsis*. *Dev. Cell* **41**:47–58.e44.

**Yao, R., Ming, Z., Yan, L., Li, S., Wang, F., Ma, S., Yu, C., Yang, M., Chen, L., and Chen, L.** (2016). DWARF14 is a non-canonical hormone receptor for strigolactone. *Nature* **536**:469.

**Yin, Y., Wang, Z.Y., Moragarcia, S., Li, J., Yoshida, S., Asami, T., and Chory, J.** (2002). BES1 accumulates in the nucleus in response to brassinosteroids to regulate gene expression and promote stem elongation. *Cell* **109**:181–191.

**Yin, Y., Vafeados, D., Tao, Y., Yoshida, S., Asami, T., and Chory, J.** (2005). A new class of transcription factors mediates brassinosteroid-regulated gene expression in *Arabidopsis*. *Cell* **120**:249–259.

**Zhou, F., Lin, Q., Zhu, L., Ren, Y., Zhou, K., Shabek, N., Wu, F., Mao, H., Dong, W., Gan, L., et al.** (2013). D14-SCF(D3)-dependent degradation of D53 regulates strigolactone signalling. *Nature* **504**:406–410.

Plant Communications, Volume 1

## Supplemental Information

**BES1 Functions as the Co-regulator of D53-like SMXLs to Inhibit *BRC1* Expression in Strigolactone-Regulated Shoot Branching in *Arabidopsis***

Jie Hu, Yuanyuan Ji, Xiaotong Hu, Shiyong Sun, and Xuelu Wang

## Supplemental Figures and Tables

### **BES1 functions as co-regulator of D53-like SMXLs to inhibit *BRC1* expression in strigolactone-regulated shoot branching in *Arabidopsis***

Jie Hu<sup>1</sup>, Yuanyuan Ji<sup>1,2</sup>, Xiaotong Hu<sup>1</sup>, Shiyong Sun<sup>1,\*</sup> and Xuelu Wang<sup>1,\*</sup>

<sup>1</sup> National Key Laboratory of Crop Genetic Improvement and Center of Integrative Biology, College of Life Science and Technology, Huazhong Agricultural University, Wuhan, 430070 China

<sup>2</sup> Department of Genetics, School of Life Sciences, Fudan University, Shanghai, 200438 China

\*Correspondence:

Xuelu Wang (Email: [xlwang@mail.hzau.edu.cn](mailto:xlwang@mail.hzau.edu.cn), Tel: 86-27-87287166, FAX: 86-27-87287366) or Shiyong Sun (Email: [sunshiyong@mail.hzau.edu.cn](mailto:sunshiyong@mail.hzau.edu.cn))

The supplemental file includes 10 Supplemental Figures and 7 Supplemental Tables.

## SUPPLEMENTAL FIGURES

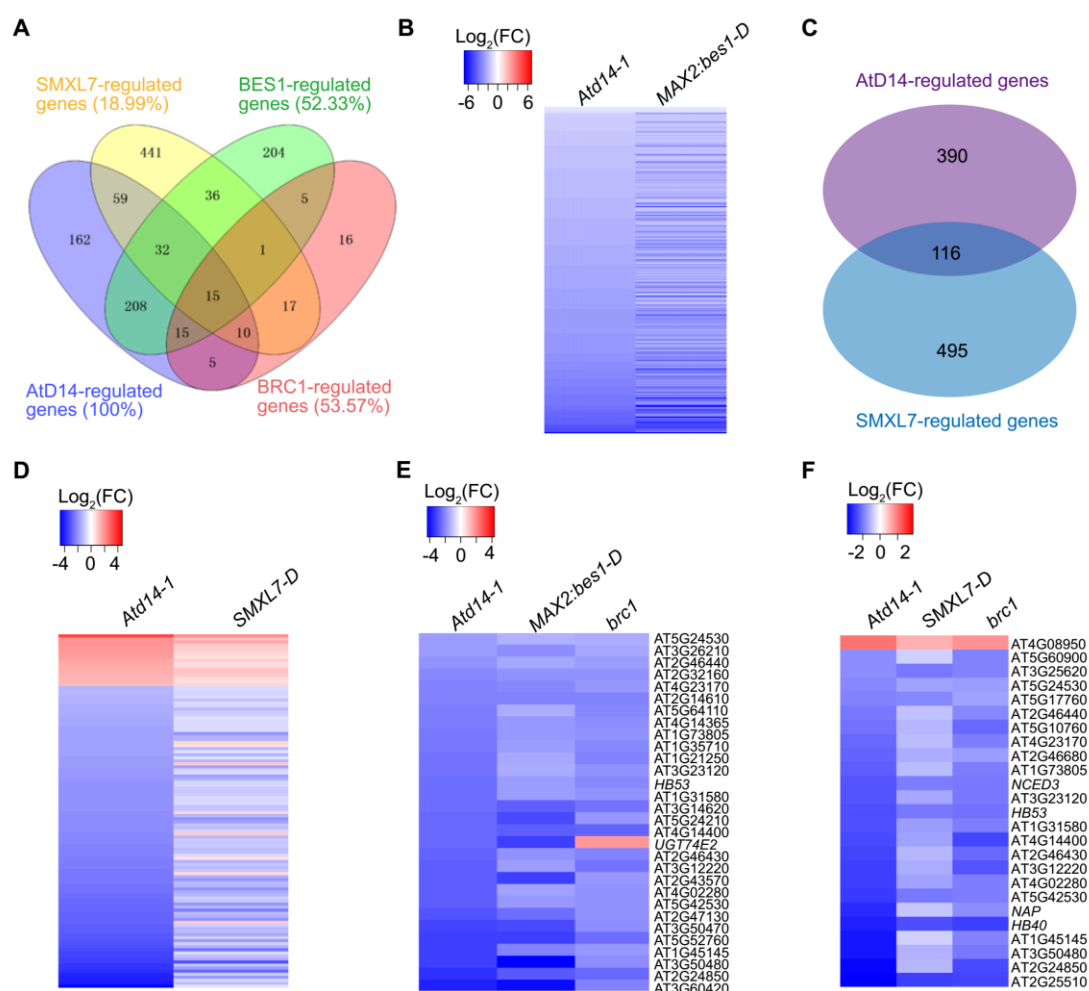

### Supplemental Figure 1. Differential expression genes in the *Atd14-1*, *SMXL7-D*, *MAX2:bes1-D* and *brc1* plants, Related to Figure 1.

(A) Percentage in bracket indicated the portion of differential expression genes in *Atd14-1* plants, co-regulated by SMXL7, BES1 and BRC1, respectively, Related to Figure 1.

(B) Heatmap displayed the expression profiles of genes co-regulated by BES1 and AtD14. The colored bars indicated the original fold change values transformed by log<sub>2</sub> regression.

(C) Venn diagram of the number of differentially expressed genes in buds of *Atd14-1*, and *SMXL7-D*, compared to Col-0.

(D) Heatmap showed the expression profiles of genes co-regulated by SMXL7 and AtD14. The colored bars indicated the original fold change values transformed by log<sub>2</sub> regression.

(E) Heatmap showed the expression profiles of genes co-regulated by AtD14, BES1 and BRC1. The colored bars indicated the original fold change values transformed by log<sub>2</sub> regression.

(F) Heatmap showed the expression profiles of genes co-regulated by AtD14, SMXL7 and BRC1. The colored bars indicated the original fold change values transformed by

log<sub>2</sub> regression.

Differentially expressed genes in buds were obtained from cuffdiff analysis with q value < 0.05.



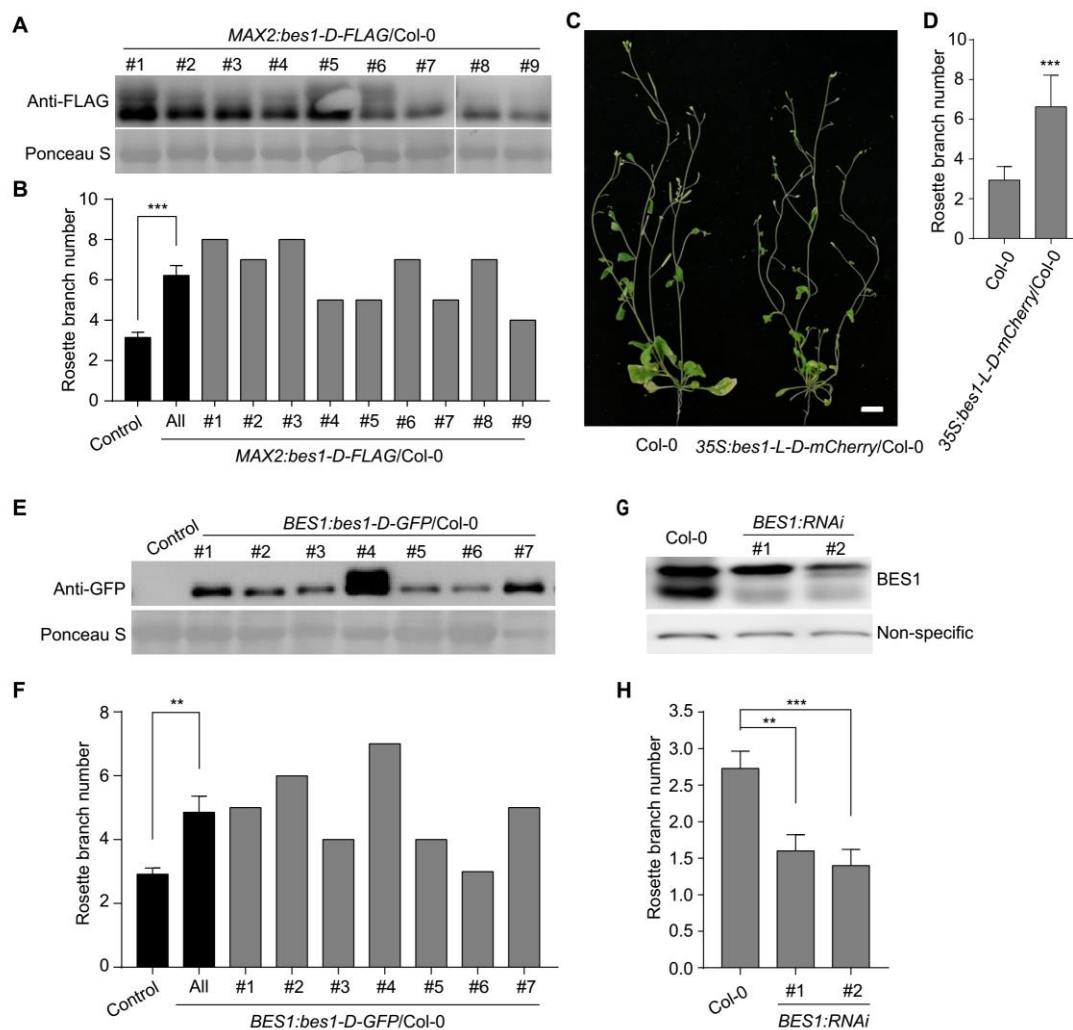

## Supplemental Figure 2. BES1 plays an important role in branching in *Arabidopsis*, Related to Figure 1.

(A) The protein level of BES1-FLAG in leaves of *MAX2:bes1-D-FLAG/Col-0* transgenic T1 lines was detected by anti-FLAG anti-body. Number #1-9 represented 9 independent T1 lines of *MAX2:bes1-D-FLAG/Col-0*.

(B) The corresponding rosette branch numbers of *MAX2:bes1-D-FLAG/Col-0* lines in (A) were collected after their completed life cycle. The control was transgenic plants expressed empty vector (sample number of the Control was 12), “All” means all of the T1 lines, number #1-9 were indicated in (A).

(C&D) The enhanced branching phenotype(C) and rosette branch numbers (D) of *35S:bes1-L-D-mCherry/Col-0* (sample number was 8) and *Col-0* (sample number was 16). Branch numbers were collected after they completed their life cycle.

(E) The protein level of BES1-GFP in *BES1:bes1-D-GFP/Col-0* transgenic T1 lines was detected by anti-GFP anti-body. Number #1-7 represented 7 independent T1 lines of *BES1:bes1-D-GFP/Col-0*.

(F) The corresponding rosette branch numbers of these *BES1:bes1-D-GFP/Col-0* lines in (E) were collected after their complete life cycle. The control was transgenic

plants expressed empty vector (the sample number was 8), “All” means all of the T1 lines, number #1-7 were indicated in (E)

**(G)** The protein level of endogenous BES1 detected by anti-BES1 anti-body of 2 independent *BESI-RNAi* lines.

**(H)** The corresponding rosette branch numbers of wild type Col-0 and these 2 independent *BESI-RNAi* lines 6 weeks after transplant on soil (sample numbers were 11, 10 and 10, respectively).

Data were means  $\pm$  SE. *P* values in (B, D, F, H) were determined by Student’s *t*-test; \*\*\* *P* < 0.001; \*\* *P* < 0.01.

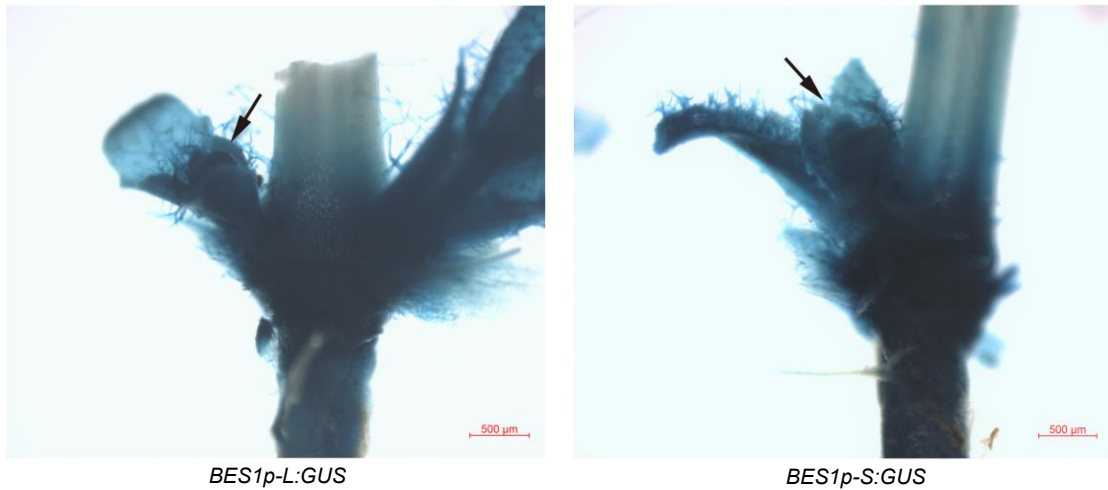

**Supplemental Figure 3. Both of the *BES1p-L:GUS* and *BES1p-S:GUS* are highly expressed in the axillary buds. Related to Figure 1.**

Buds wrapped by young leaves are less than 0.5 mm and pointed by black arrows. Scar bar represent 500 μm.

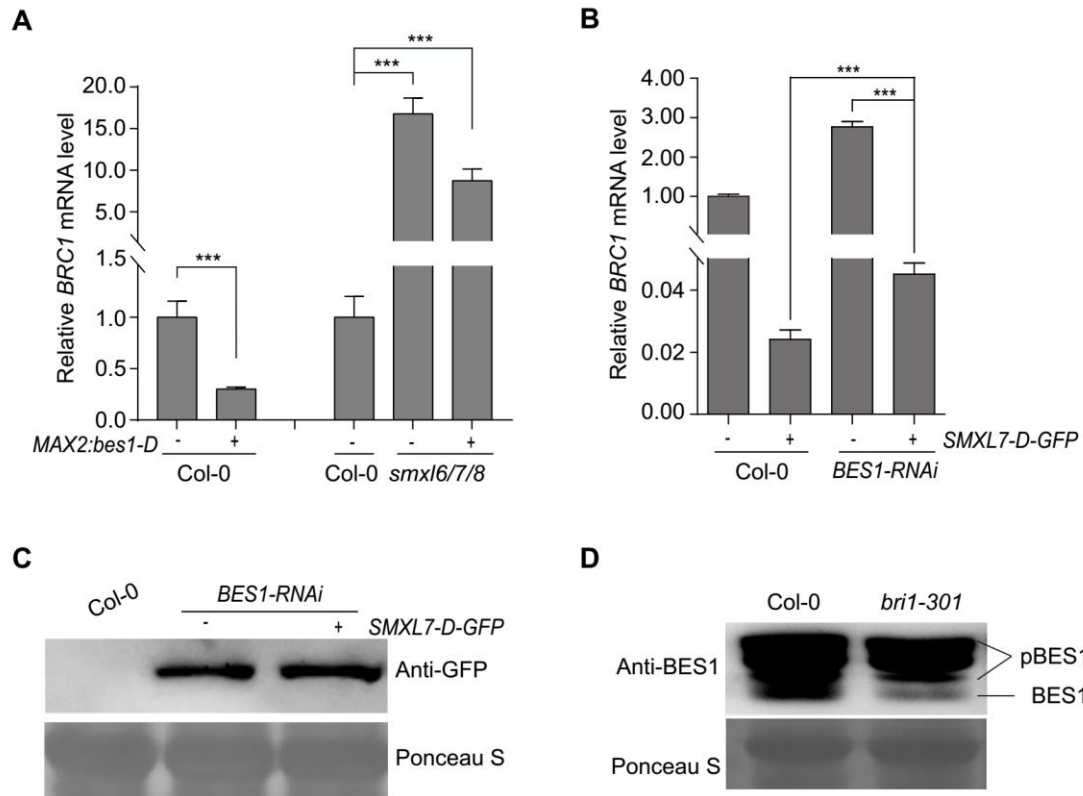

**Supplemental Figure 4. Identification of the related protein and expression levels in transgenic plants, Related to Figure 1, 3 and 4.**

(A) The transcription level of *BRC1* in *MAX2:bes1-D-FLAG* in Col-0 and *smxl6/7/8* background, and Col-0, *smxl6/7/8* lines, respectively.

(B) The transcription level of *BRC1* in *SMXL7-D-GFP/Col-0* and *SMXL7-D-GFP/BES1-RNAi* background, Col-0 and *BES1-RNAi* lines.

(C) Immunoblotting revealed *SMXL7-GFP* levels was similar in *SMXL7-D-GFP/Col-0* and *SMXL7-D-GFP/BES1-RNAi* transgenic lines using anti-GFP antibody. Ponceau S staining showed that equivalent amounts of loaded proteins were analyzed.

(D) Immunoblotting revealed the phosphorylated status of *BES1* in Col-0 and *bri1-301* seedlings by endogenous anti-BES1 antibody. Ponceau S staining showed that equivalent amounts of loaded proteins were analyzed.

Data were means  $\pm$  SD (n = 3). *P* values in (A and B) were determined by Student's *t*-test; \*\*\* *P* < 0.001.

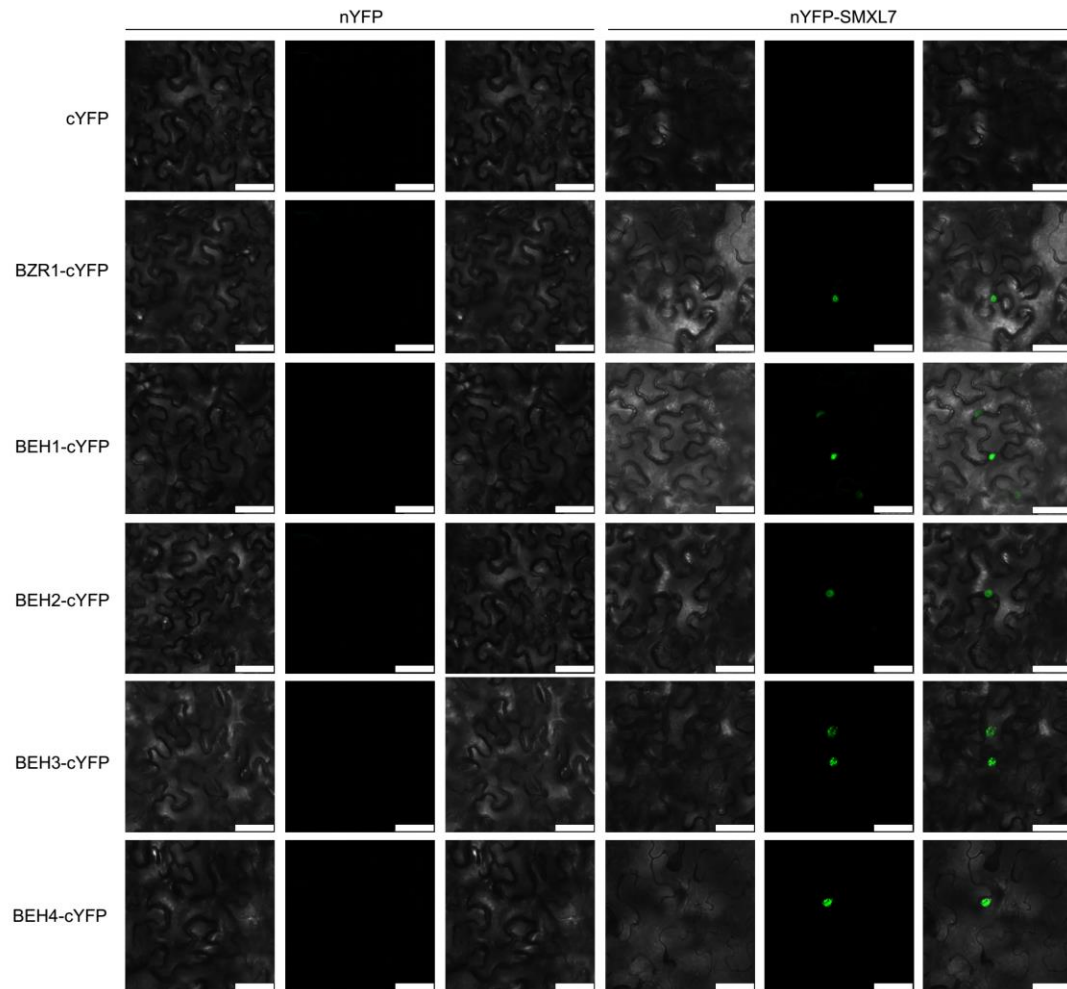

**Supplemental Figure 5. SMXL7 interacts with the homologs of BES1, Related to Figure 2.**

In bimolecular fluorescence complementation assays, SMXL7 interacted with the homologs of BES1. nYFP was fused to the N-terminus of SMXL7, and cYFP was linked to the C-terminus of BES1 homologs, including BZR1, BEH1, BEH2, BEH3, and BEH4, which were transiently co-expressed with nYFP-SMXL7 in *N. benthamiana* leaves. Scale bars represented 50  $\mu$ m.

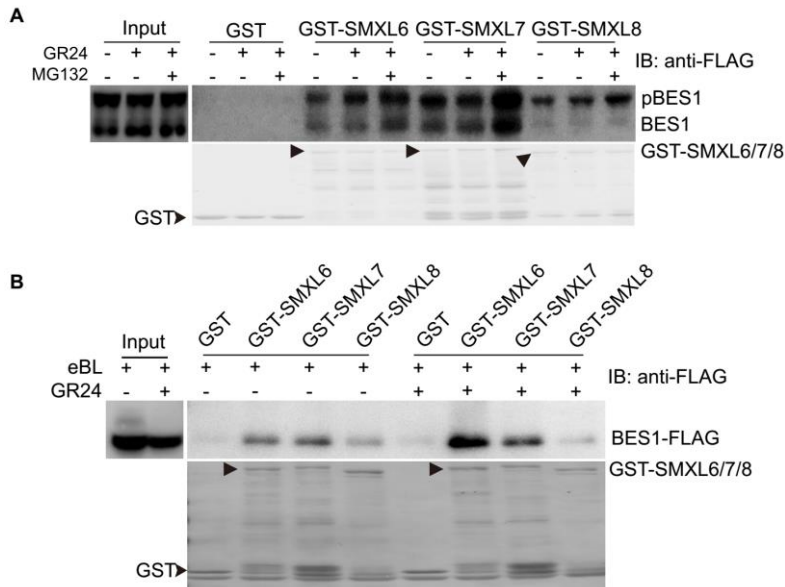

**Supplemental Figure 6. BRs and SLs have no effect on the interaction between BES1 and SMXL7, Related to Figure 2.**

(A) The interaction between BES1 and D53-like SMXLs was independent of GR24 treatment. 5  $\mu$ M GR24 and 50  $\mu$ M MG132 were added in the incubation of GST recombinant proteins and protein extraction of *35S:BES1-FLAG/Col-0* plants.

(B) The interaction between BES1 and D53-like SMXLs was independent of eBL, and eBL plus GR24 treatment. The semi-*in vivo* pull-down assay used GST recombinant proteins, and protein extraction was from seedlings of *35S:BES1-FLAG/Col-0* plants. 5  $\mu$ M eBL and 5  $\mu$ M eBL plus 5  $\mu$ M GR24 treatment for 3 hrs were performed on the seedling of *35S:BES1-FLAG/Col-0* plants before protein extraction and during the incubation of GST recombinant proteins and protein extraction of *35S:BES1-FLAG/Col-0* plants.

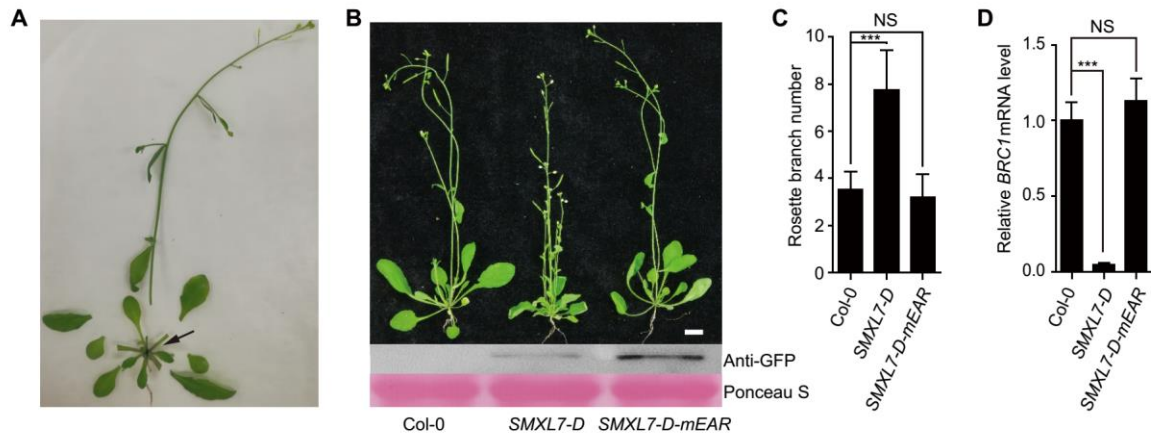

**Supplemental Figure 7. The EAR motif of SMXLs is required to inhibit *BRC1* expression. Related to Figure 3.**

(A) the shoot-root junction region of plants contained rosette buds without rosette leaves and large bud leaves used in ChIP assays (Black arrow pointed).

(B&C) Phenotypes and quantification of rosette branch number of Col-0, *SMXL7-D* and *SMXL7-D-mEAR* transgenic lines. bar = 1cm, (Col-0 (n = 15), *SMXL7-D* (n = 19) and *SMXL7-D-mEAR* (n = 26)).

(D) Relative expression levels of *BRC1* in Col-0, *SMXL7-D* and *SMXL7-D-mEAR* were determined by qRT-PCR.

Data were means  $\pm$  SE in (C); data were means  $\pm$  SD (n = 3) in (D). *P* values in (C and D) were determined by Student's *t*-test; \*\*\* *P* < 0.001; non-significant (NS), *P* > 0.05.

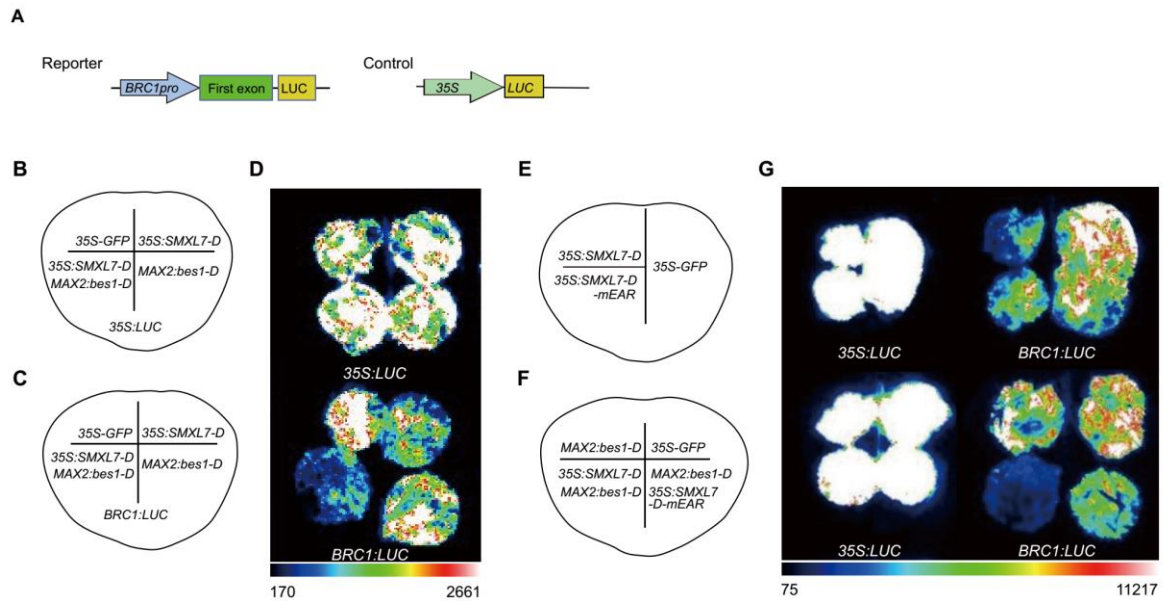

**Supplemental Figure 8. The D53-like SMXLs and BES1 depend on each other to inhibit *BRC1* expression. Related to Figure 3.**

**(A)** Schematic diagrams of the luciferase and control reporter in below transient expression assays.

**(B&C&D)** The LUC reporter system indicated *BRC1* was corporately inhibited by SMXL7 and BES1. Schematic representation in (B&C) showed the combinations of reporters and effectors in the corresponding position.

**(E&F&G)** The LUC reporter system indicated the EAR motif of SMXL7 was essential for inhibition of the luciferase activity of *BRC1:LUC* by the SMXL7–BES1 complex. Schematic representation in (E&F) showed the combinations of reporters, and effectors in the corresponding position.



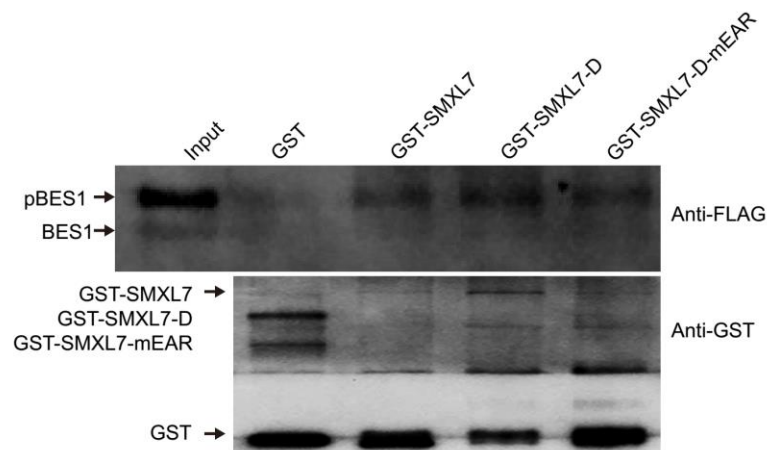

**Supplemental Figure 9. BES1 interacts with SMXL7-D and SMXL7-D-mEAR, Related to Figure 3.**

Semi-in vivo pull-down assay used glutathione-S-transferase (GST), GST-SMXL7, GST-SMXL7-D, and GST-SMXL7-D-mEAR recombinant proteins, and plant protein was extracted from *35S:BES1-FLAG* plants.

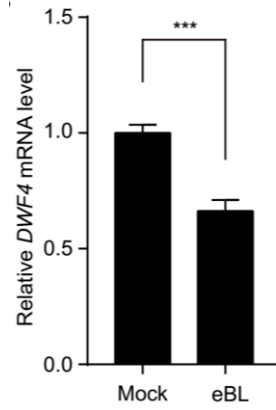

**Supplemental Figure 10. Related to Figure 4. The transcription level of *DWF4* in buds of Col-0 under mock and 5  $\mu$ M eBL treatments for 3 hrs. Data were means  $\pm$  SD (n = 3). *P* values were determined by Student's *t*-test; \*\*\* *P* < 0.001.**

**Supplemental Table 1. Differential-expressed genes regulated by AtD14**

| Up-regulated genes in <i>Atd14-1</i><br>(VS Col-0) | Down-regulated genes in <i>Atd14-1</i> (VS Col-0) |           |           |           |           |
|----------------------------------------------------|---------------------------------------------------|-----------|-----------|-----------|-----------|
| AT1G57750                                          | AT4G33540                                         | AT5G13220 | AT2G29420 | AT5G48430 | AT3G46280 |
| AT5G37940                                          | AT3G15950                                         | AT5G19230 | AT4G36990 | AT3G12220 | AT2G34500 |
| AT1G31690                                          | AT3G23570                                         | AT2G33380 | AT4G32480 | AT4G23230 | AT5G38200 |
| AT4G17860                                          | AT5G55120                                         | AT5G50200 | AT2G41231 | AT5G60270 | AT3G59220 |
| AT4G27570                                          | AT1G60140                                         | AT4G33050 | AT2G43620 | AT5G45380 | AT2G15490 |
| AT4G04840                                          | AT4G27560                                         | AT2G02010 | AT1G15520 | AT2G23680 | AT5G13370 |
| AT1G05540                                          | AT1G70530                                         | AT2G39710 | AT1G58390 | AT3G54420 | AT3G48520 |
| AT1G68600                                          | AT1G68670                                         | AT2G37040 | AT5G42530 | AT1G79410 | AT5G52050 |
| AT4G04955                                          | AT2G34660                                         | AT5G42830 | AT3G47340 | AT5G07010 | AT4G15610 |
| AT1G06350                                          | ATMG00020                                         | AT5G12170 | AT5G63790 | AT5G23660 | AT1G43160 |
| AT5G60490                                          | AT1G69870                                         | AT1G09970 | AT1G35910 | AT5G06860 | AT1G01680 |
| AT4G08950                                          | AT4G22505                                         | AT4G15120 | AT5G26340 | AT3G49780 | AT1G05800 |
| AT1G29660                                          | AT3G06500                                         | AT4G21380 | AT3G05660 | AT3G25730 | AT1G07900 |
| AT5G50790                                          | AT4G21410                                         | AT4G08870 | AT1G21120 | AT2G44790 | AT1G13540 |
| AT1G55330                                          | AT2G13790                                         | AT5G64110 | AT5G08790 | AT4G02280 | AT1G18980 |
| AT3G59010                                          | AT2G36320                                         | AT5G38940 | AT3G48360 | AT2G39980 | AT1G28180 |
| AT3G19680                                          | AT5G55860                                         | AT2G47000 | AT3G24420 | AT3G57260 | AT1G33960 |
| AT1G43790                                          | AT1G58360                                         | AT2G46440 | AT2G26560 | AT2G30140 | AT1G62420 |
| AT1G74670                                          | AT1G17420                                         | AT2G05380 | AT4G26120 | AT5G52760 | AT1G70130 |
| AT2G40460                                          | AT5G19120                                         | AT5G22270 | AT5G17860 | AT4G18170 | AT1G73965 |
| AT1G06360                                          | AT5G13750                                         | AT1G13990 | AT5G49520 | AT1G17170 | AT2G14610 |
| AT2G42990                                          | AT5G36160                                         | AT2G47800 | AT4G19460 | AT3G16530 | AT2G31083 |
| AT3G58120                                          | AT5G51830                                         | AT3G21670 | AT4G14400 | AT1G17180 | AT2G42430 |
| AT5G44680                                          | AT2G41090                                         | AT3G26210 | AT2G38530 | AT1G52890 | AT2G44810 |
| AT1G63710                                          | AT1G01720                                         | AT1G76680 | AT1G21310 | AT2G25510 | AT2G47770 |
| AT5G51890                                          | AT3G05650                                         | AT2G27310 | AT5G16970 | AT1G66480 | AT3G02240 |
| AT1G22160                                          | AT1G54010                                         | AT3G25780 | AT5G35935 | AT5G48657 | AT3G11980 |
| AT5G44020                                          | AT2G23200                                         | AT1G61820 | AT2G36080 | AT1G02920 | AT3G46650 |
| AT4G39800                                          | AT1G49750                                         | AT4G23170 | AT1G70140 | AT1G02930 | AT3G49845 |
| AT1G78020                                          | AT4G15760                                         | AT2G27500 | AT2G43570 | AT1G66760 | AT4G04510 |
| AT1G22530                                          | AT1G72940                                         | AT2G30400 | AT1G01560 | AT3G53480 | AT4G04540 |
| AT1G01600                                          | AT3G23030                                         | AT1G58340 | AT5G36220 | AT1G51800 | AT4G13420 |
| AT1G80280                                          | AT2G21690                                         | AT2G38860 | AT4G23600 | AT3G13790 | AT4G22070 |
| AT5G44130                                          | AT2G22680                                         | AT1G17830 | AT5G49700 | AT5G13330 | AT4G27140 |
| AT4G18970                                          | AT5G57660                                         | AT1G69730 | AT3G22160 | AT3G50470 | AT5G07310 |
| AT1G20850                                          | AT2G29450                                         | AT2G36800 | AT3G16330 | AT1G77450 | AT5G10625 |
| AT2G01420                                          | AT4G34138                                         | AT4G14365 | AT2G28400 | AT4G21120 | AT5G12030 |
| AT1G01120                                          | AT1G76520                                         | AT3G27025 | AT1G12200 | AT4G36740 | AT5G16920 |
| AT2G04070                                          | AT2G46270                                         | AT1G76590 | AT3G13650 | AT2G39030 | AT5G52400 |
| AT3G16680                                          | AT5G53420                                         | AT3G47780 | AT5G15970 | AT4G01870 | AT5G64890 |
| AT4G04000                                          | AT1G32640                                         | AT5G24290 | AT2G18050 | AT3G44860 | AT5G66780 |
| AT5G37970                                          | AT5G05460                                         | AT1G31580 | AT2G37760 | AT4G15530 | AT4G39950 |
|                                                    | AT4G17900                                         | AT5G20230 | AT3G04000 | AT3G14440 | AT5G52640 |
|                                                    | AT3G51450                                         | AT5G57480 | AT1G59740 | AT2G14560 | AT2G43510 |
|                                                    | AT2G31160                                         | AT5G35735 | AT3G55720 | AT2G45570 | AT2G41380 |
|                                                    | AT5G67420                                         | AT3G48990 | AT3G48080 | AT4G02520 | AT1G64950 |
|                                                    | AT1G80440                                         | AT1G72120 | AT1G05680 | AT3G55970 | AT4G31500 |
|                                                    | AT2G43520                                         | AT1G21250 | AT5G66650 | AT2G39200 | AT1G64900 |
|                                                    | AT1G25550                                         | AT2G44290 | AT5G47560 | AT3G17609 | AT5G22300 |
|                                                    | AT3G13110                                         | AT1G62940 | AT4G25410 | AT4G34710 | AT4G22530 |
|                                                    | AT4G37180                                         | AT4G35110 | AT4G08770 | AT1G02850 | AT1G02400 |
|                                                    | AT3G53260                                         | AT2G18660 | AT1G73480 | AT4G02380 | AT1G69490 |
|                                                    | AT1G08800                                         | AT3G25610 | AT1G75490 | AT3G12580 | AT3G19030 |
|                                                    | AT4G34000                                         | AT1G35710 | AT1G16850 | AT3G60420 | AT3G50480 |
|                                                    | AT3G13910                                         | AT2G46680 | AT5G05600 | AT2G29440 | AT3G50770 |
|                                                    | AT5G11260                                         | AT2G41510 | AT5G07440 | AT2G24850 | AT3G50970 |
|                                                    | AT1G17745                                         | AT5G03700 | AT5G14180 | AT2G15480 | AT5G15960 |
|                                                    | AT1G17380                                         | AT5G10760 | AT5G04340 | AT3G18550 | AT1G16260 |
|                                                    | AT4G36040                                         | AT4G37370 | AT1G66920 | AT1G74010 | AT3G44720 |
|                                                    | AT5G61010                                         | AT3G57240 | AT2G39210 | AT1G32960 | AT1G69850 |
|                                                    | AT2G26530                                         | AT4G13180 | AT5G25440 | AT3G63380 | AT3G28930 |
|                                                    | AT1G60730                                         | AT3G46660 | AT5G46050 | AT5G55050 | AT5G66700 |
|                                                    | AT1G59700                                         | AT5G60950 | AT1G49500 | AT1G55920 | AT5G60900 |
|                                                    | AT4G21400                                         | AT2G20670 | AT2G27690 | AT3G26830 | AT1G72900 |
|                                                    | AT5G19440                                         | AT5G49480 | AT1G34420 | AT5G49690 | AT1G56650 |
|                                                    | AT3G49120                                         | AT3G21230 | AT5G24210 | AT4G08555 | AT4G34135 |
|                                                    | AT3G51430                                         | AT5G14780 | AT5G61820 | AT1G76930 | AT2G46430 |
|                                                    | AT4G28490                                         | AT2G36950 | AT1G14870 | AT1G80820 | AT1G45145 |
|                                                    | AT4G17500                                         | AT2G27830 | AT5G11410 | AT3G15500 | AT5G25250 |
|                                                    | AT1G49050                                         | AT4G18360 | AT3G14620 | AT1G69930 | AT2G37770 |
|                                                    | AT5G54170                                         | AT2G32160 | AT1G10340 | AT4G22710 | AT2G29460 |
|                                                    | AT1G73500                                         | AT3G03990 | AT1G52200 | AT3G54150 | AT3G23250 |
|                                                    | AT5G54510                                         | AT2G15760 | AT3G23120 | AT3G44300 | AT3G49620 |
|                                                    | AT2G37180                                         | AT5G39050 | AT2G47130 | AT1G77760 |           |
|                                                    | AT1G50420                                         | AT4G38540 | AT5G39610 | AT1G02360 |           |
|                                                    | AT4G19700                                         | AT1G73805 | AT2G18690 | AT4G36850 |           |

**Supplemental Table 2. Differential-expressed genes regulated by BES1**

| Up-regulated genes in <i>MAX2:bes1-D</i> (VS Col-0) | Down-regulated genes in <i>MAX2:bes1-D</i> (VS Col-0) |           |           |           |           |           |           |
|-----------------------------------------------------|-------------------------------------------------------|-----------|-----------|-----------|-----------|-----------|-----------|
| AT1G19350                                           | AT1G20440                                             | AT5G52640 | AT1G08050 | AT2G36950 | AT2G47000 | AT4G25810 | AT3G60120 |
| AT2G41640                                           | AT4G16990                                             | AT1G31580 | AT4G18360 | AT5G10380 | AT4G25410 | AT1G72920 | AT4G06746 |
| AT4G25100                                           | AT2G44490                                             | AT4G37410 | AT1G18590 | AT5G26920 | AT4G30270 | AT4G34135 | AT4G08040 |
| AT5G42800                                           | AT2G26190                                             | AT3G16670 | AT3G16720 | AT5G01100 | AT1G76070 | AT2G41100 | AT4G11480 |
| AT1G67750                                           | AT3G49120                                             | AT5G53290 | AT1G56660 | AT1G63720 | AT2G41231 | AT3G15356 | AT4G12490 |
| AT4G00870                                           | AT2G39570                                             | AT5G56980 | AT3G25760 | AT5G05440 | AT2G36970 | AT3G52450 | AT4G12500 |
| AT4G34760                                           | AT2G29450                                             | AT3G13110 | AT1G34420 | AT5G49520 | AT2G39210 | AT1G55920 | AT4G13420 |
| AT2G16586                                           | AT5G04720                                             | AT5G46330 | AT2G30870 | AT5G11410 | AT5G65300 | AT5G35735 | AT4G16260 |
| AT3G07010                                           | AT3G03780                                             | AT4G02940 | AT3G10985 | AT4G08870 | AT1G61560 | AT2G45570 | AT4G21830 |
| AT4G02290                                           | AT1G69870                                             | AT3G23120 | AT2G46430 | AT2G43590 | AT1G25400 | AT1G14870 | AT4G22070 |
| AT4G00820                                           | AT1G01720                                             | AT1G26930 | AT1G21130 | AT4G18010 | AT2G36380 | AT3G13790 | AT4G27140 |
| AT4G20320                                           | AT5G27760                                             | AT3G57520 | AT5G20480 | AT5G49700 | AT1G31540 | AT5G13330 | AT4G31950 |
| AT2G03821                                           | AT3G50950                                             | AT1G17860 | AT3G30775 | AT4G20830 | AT5G05690 | AT5G05690 | AT4G37990 |
| AT4G22080                                           | AT5G03380                                             | AT1G72450 | AT1G76590 | AT2G39400 | AT5G23510 | AT5G24210 | AT5G05300 |
| AT5G58360                                           | AT5G22920                                             | AT2G46440 | AT1G45145 | AT1G66760 | AT4G39070 | AT1G65390 | AT5G07100 |
|                                                     | AT4G24160                                             | AT1G72680 | AT1G72520 | AT1G79410 | AT4G35770 | AT2G44790 | AT5G15130 |
|                                                     | AT5G24530                                             | AT5G42530 | AT5G47560 | AT5G14780 | AT5G54710 | AT3G60420 | AT5G17350 |
|                                                     | AT1G32700                                             | AT3G54640 | AT1G73480 | AT4G24040 | AT1G68620 | AT3G15500 | AT5G17390 |
|                                                     | AT3G16420                                             | AT4G17250 | AT3G22370 | AT5G49480 | AT2G32150 | AT3G50480 | AT5G22540 |
|                                                     | AT2G43520                                             | AT2G36080 | AT2G18193 | AT1G73500 | AT3G25780 | AT2G39200 | AT5G46295 |
|                                                     | AT3G57450                                             | AT4G29780 | AT4G34230 | AT2G36800 | AT5G26340 | AT1G66480 | AT5G64890 |
|                                                     | AT1G49050                                             | AT5G65380 | AT5G13200 | AT1G10370 | AT1G72930 | AT1G27730 | AT1G05010 |
|                                                     | AT3G15210                                             | AT2G31750 | AT4G01010 | AT1G77450 | AT4G35110 | AT5G49690 | AT1G61890 |
|                                                     | AT5G67300                                             | AT3G05660 | AT4G39950 | AT5G13220 | AT2G43510 | AT5G64120 | AT5G18130 |
|                                                     | AT4G28490                                             | AT1G21000 | AT2G32160 | AT3G61280 | AT1G76650 | AT3G55970 | AT3G10340 |
|                                                     | AT5G13750                                             | AT3G23030 | AT5G41740 | AT2G47130 | AT5G39610 | AT3G50970 | AT1G11580 |
|                                                     | AT3G13520                                             | AT3G62150 | AT5G14120 | AT5G46050 | AT3G63380 | AT3G59220 | AT4G19880 |
|                                                     | AT4G15490                                             | AT2G46600 | AT1G60730 | AT3G26210 | AT4G17500 | AT2G34500 | AT4G27300 |
|                                                     | AT5G64110                                             | AT4G02280 | AT2G40000 | AT3G23570 | AT1G15125 | AT4G21120 | AT1G72120 |
|                                                     | AT2G23810                                             | AT1G35710 | AT1G75750 | AT4G23600 | AT4G01750 | AT2G19800 | AT1G51760 |
|                                                     | AT1G54020                                             | AT5G05730 | AT1G19380 | AT1G72910 | AT5G16970 | AT5G20230 | AT1G21010 |
|                                                     | AT4G36648                                             | AT3G51600 | AT4G23170 | AT1G09970 | AT3G21230 | AT5G05600 | AT2G48020 |
|                                                     | AT2G43910                                             | AT2G24100 | AT1G06620 | AT2G35930 | AT3G17609 | AT5G04340 | AT3G18830 |
|                                                     | AT1G20510                                             | AT5G66700 | AT3G28930 | AT3G26220 | AT3G04210 | AT1G76930 | AT3G20660 |
|                                                     | AT5G06870                                             | AT1G70700 | AT5G25440 | AT2G37040 | AT1G02930 | AT4G15530 | AT5G39020 |
|                                                     | AT1G21250                                             | AT3G55980 | AT5G48540 | AT5G36220 | AT1G76680 | AT1G80820 | AT4G22530 |
|                                                     | AT1G54010                                             | AT1G57990 | AT3G21240 | AT3G46110 | AT1G70140 | AT2G37770 | AT4G38860 |
|                                                     | AT5G38940                                             | AT4G39940 | AT3G22060 | AT5G45340 | AT3G47340 | AT2G26560 | AT5G57785 |
|                                                     | AT3G45640                                             | AT1G75040 | AT1G74100 | AT2G22470 | AT1G62300 | AT4G02380 | AT1G61820 |
|                                                     | AT1G70530                                             | AT4G15760 | AT2G43620 | AT1G72940 | AT1G19180 | AT3G49620 | AT4G36670 |
|                                                     | AT3G50660                                             | AT5G52310 | AT1G68840 | AT3G16330 | AT5G22270 | AT4G02520 | AT1G37130 |
|                                                     | AT3G51450                                             | AT4G14365 | AT5G39050 | AT2G44080 | AT5G08790 | AT5G52050 | AT3G19030 |
|                                                     | AT3G05200                                             | AT3G56400 | AT2G16060 | AT1G75490 | AT1G28370 | AT3G01290 | AT4G13395 |
|                                                     | AT5G42650                                             | AT5G61600 | AT3G46660 | AT5G12170 | AT5G52760 | AT2G15480 | AT3G22160 |
|                                                     | AT1G28130                                             | AT5G44260 | AT3G54140 | AT2G18660 | AT2G02010 | AT3G26830 | AT4G36850 |
|                                                     | AT5G05140                                             | AT4G31500 | AT1G02400 | AT5G27420 | AT4G01870 | AT2G29460 | AT3G52400 |
|                                                     | AT1G03220                                             | AT3G47420 | AT5G59540 | AT2G37760 | AT4G18170 | AT3G23250 | AT1G15520 |
|                                                     | AT5G05460                                             | AT5G63160 | AT4G22690 | AT3G12580 | AT2G30140 | AT1G02920 | AT4G13180 |
|                                                     | AT1G13990                                             | AT1G17380 | AT5G61820 | AT3G13650 | AT5G15960 | AT3G16530 | AT1G72900 |
|                                                     | AT5G06320                                             | AT4G23270 | AT1G76520 | AT3G18550 | AT2G43570 | AT1G43160 | AT5G07010 |
|                                                     | AT1G11330                                             | AT5G17000 | AT1G71880 | AT5G46350 | AT5G13370 | AT1G05800 | AT1G17170 |
|                                                     | AT5G01210                                             | AT3G12220 | AT3G50760 | AT2G39980 | AT3G48650 | AT1G07160 | AT1G27020 |
|                                                     | AT1G68440                                             | AT1G12110 | AT4G36500 | AT1G76600 | AT1G02850 | AT1G07900 | AT5G55050 |
|                                                     | AT1G64950                                             | AT1G73805 | AT1G08930 | AT3G47780 | AT2G27690 | AT1G08090 | AT1G05680 |
|                                                     | AT4G27830                                             | AT4G17900 | AT3G25610 | AT5G19240 | AT3G50470 | AT1G13480 | AT1G18570 |
|                                                     | AT3G59140                                             | AT4G21850 | AT1G23850 | AT2G29420 | AT3G22910 | AT1G13520 | AT2G25735 |
|                                                     | AT2G30600                                             | AT2G46650 | AT5G60950 | AT1G78000 | AT3G54420 | AT1G18980 | AT2G39530 |
|                                                     | AT3G13080                                             | AT4G17490 | AT2G24600 | AT5G41750 | AT3G24420 | AT1G20310 | AT2G41800 |
|                                                     | AT1G13260                                             | AT3G53260 | AT4G06744 | AT2G15042 | AT4G38540 | AT1G26390 | AT3G04420 |
|                                                     | AT1G22890                                             | AT5G56870 | AT2G22770 | AT2G27500 | AT5G60270 | AT1G28180 | AT3G19615 |
|                                                     | AT1G17420                                             | AT3G28220 | AT2G30400 | AT5G44380 | AT4G33050 | AT1G30720 | AT3G43250 |
|                                                     | AT4G17230                                             | AT5G51830 | AT4G32870 | AT3G25770 | AT2G23680 | AT1G32350 | AT3G48850 |
|                                                     | AT5G17380                                             | AT2G27830 | AT1G52890 | AT5G07440 | AT5G17860 | AT1G36622 | AT3G52748 |
|                                                     | AT1G01470                                             | AT4G36990 | AT1G18390 | AT2G26530 | AT5G45380 | AT1G51890 | AT1G21400 |
|                                                     | AT5G19440                                             | AT5G49730 | AT5G63790 | AT3G13950 | AT5G40780 | AT1G57650 | AT3G21690 |
|                                                     | AT4G31800                                             | AT5G53550 | AT3G48990 | AT3G01970 | AT5G50200 | AT1G79680 | AT4G37370 |
|                                                     | AT4G21380                                             | AT1G51680 | AT1G16660 | AT4G14400 | AT1G24147 | AT2G02930 | AT5G47220 |
|                                                     | AT2G40140                                             | AT4G37610 | AT1G59740 | AT5G52750 | AT1G66160 | AT2G14610 | AT5G19230 |
|                                                     | AT5G54170                                             | AT2G25450 | AT2G43820 | AT3G04720 | AT2G27310 | AT2G15390 | AT2G36690 |
|                                                     | AT5G54500                                             | AT1G44350 | AT2G30250 | AT2G15760 | AT1G77760 | AT2G17740 |           |
|                                                     | AT3G49110                                             | AT5G20250 | AT3G04000 | AT2G24850 | AT5G06860 | AT2G32660 |           |
|                                                     | AT4G30530                                             | AT1G78850 | AT4G19810 | AT2G38470 | AT3G14620 | AT2G35980 |           |

**Supplemental Table 3. Differential-expressed genes co-regulated by AtD14-BES1**

| Up-regulated genes | Down-regulated genes |           |           |           |
|--------------------|----------------------|-----------|-----------|-----------|
| N/A                | AT3G23570            | AT2G22770 | AT4G23600 | AT1G80820 |
|                    | AT1G70530            | AT3G25770 | AT5G49700 | AT3G15500 |
|                    | AT1G69870            | AT5G13220 | AT3G22160 | AT1G77760 |
|                    | AT1G17420            | AT5G19230 | AT3G16330 | AT4G36850 |
|                    | AT5G13750            | AT5G50200 | AT3G13650 | AT2G37770 |
|                    | AT5G51830            | AT4G33050 | AT2G37760 | AT2G29460 |
|                    | AT1G01720            | AT2G02010 | AT3G04000 | AT3G23250 |
|                    | AT1G54010            | AT2G37040 | AT1G59740 | AT3G49620 |
|                    | AT4G15760            | AT5G12170 | AT1G05680 | AT3G50970 |
|                    | AT1G72940            | AT1G09970 | AT5G47560 | AT5G15960 |
|                    | AT3G23030            | AT4G21380 | AT4G25410 | AT2G34500 |
|                    | AT3G21690            | AT4G08870 | AT1G73480 | AT3G59220 |
|                    | AT2G29450            | AT5G64110 | AT1G75490 | AT5G13370 |
|                    | AT1G76520            | AT5G38940 | AT5G05600 | AT5G52050 |
|                    | AT5G05460            | AT2G47000 | AT5G07440 | AT1G43160 |
|                    | AT4G17900            | AT2G46440 | AT5G04340 | AT1G05800 |
|                    | AT3G51450            | AT5G22270 | AT2G39210 | AT1G07900 |
|                    | AT2G43520            | AT1G13990 | AT5G25440 | AT1G18980 |
|                    | AT3G13110            | AT3G26210 | AT5G46050 | AT1G28180 |
|                    | AT3G53260            | AT1G76680 | AT2G27690 | AT2G14610 |
|                    | AT1G17380            | AT2G27310 | AT1G34420 | AT4G13420 |
|                    | AT2G26530            | AT3G25780 | AT5G24210 | AT4G22070 |
|                    | AT1G60730            | AT1G61820 | AT5G61820 | AT4G27140 |
|                    | AT5G19440            | AT4G23170 | AT1G14870 | AT5G64890 |
|                    | AT3G49120            | AT2G27500 | AT5G11410 | AT4G20830 |
|                    | AT4G28490            | AT2G30400 | AT3G14620 | AT5G40780 |
|                    | AT4G17500            | AT2G38860 | AT3G23120 | AT3G21240 |
|                    | AT1G49050            | AT2G36800 | AT2G47130 | AT5G59540 |
|                    | AT5G54170            | AT4G14365 | AT5G39610 | AT1G18570 |
|                    | AT1G73500            | AT1G76590 | AT4G34135 | AT5G41750 |
|                    | AT3G28930            | AT3G47780 | AT2G46430 | AT4G24040 |
|                    | AT1G64950            | AT1G31580 | AT1G45145 | AT5G52750 |
|                    | AT4G31500            | AT5G20230 | AT3G19030 | AT5G17860 |
|                    | AT4G39950            | AT5G35735 | AT3G50480 | AT5G49520 |
|                    | AT1G74100            | AT3G48990 | AT2G43510 | AT4G14400 |
|                    | AT1G10370            | AT1G72120 | AT3G12220 | AT5G16970 |
|                    | AT4G34230            | AT1G21250 | AT5G60270 | AT2G36080 |
|                    | AT2G44080            | AT4G35110 | AT5G45380 | AT1G70140 |
|                    | AT5G24530            | AT2G18660 | AT2G23680 | AT2G43570 |
|                    | AT4G27830            | AT3G25610 | AT3G54420 | AT5G36220 |
|                    | AT1G21000            | AT1G35710 | AT1G79410 | AT2G15480 |
|                    | AT1G27020            | AT4G37370 | AT5G07010 | AT3G18550 |
|                    | AT1G72680            | AT4G13180 | AT5G06860 | AT3G63380 |
|                    | AT1G51760            | AT3G46660 | AT2G44790 | AT5G55050 |
|                    | AT3G20660            | AT5G60950 | AT4G02280 | AT1G55920 |
|                    | AT5G17000            | AT5G49480 | AT2G39980 | AT3G26830 |
|                    | AT3G50950            | AT3G21230 | AT2G30140 | AT5G49690 |
|                    | AT1G44350            | AT5G14780 | AT5G52760 | AT1G76930 |
|                    | AT1G06620            | AT2G36950 | AT4G18170 | AT1G19180 |
|                    | AT2G31750            | AT2G27830 | AT1G17170 | AT5G53290 |
|                    | AT5G47220            | AT4G18360 | AT3G16530 | AT3G46110 |
|                    | AT4G37410            | AT2G32160 | AT1G52890 | AT1G18390 |
|                    | AT1G32700            | AT2G15760 | AT1G66480 | AT1G72930 |
|                    | AT3G25760            | AT5G39050 | AT1G02920 | AT5G26340 |
|                    | AT4G15490            | AT4G38540 | AT1G02930 | AT3G05660 |
|                    | AT5G27420            | AT1G73805 | AT1G66760 | AT5G08790 |
|                    | AT1G26930            | AT5G66700 | AT3G13790 | AT3G24420 |
|                    | AT2G32150            | AT1G72900 | AT5G13330 | AT2G26560 |
|                    | AT5G01210            | AT4G22530 | AT3G50470 | AT4G02380 |
|                    | AT3G10985            | AT1G02400 | AT1G77450 | AT3G12580 |
|                    | AT3G22060            | AT5G52640 | AT4G21120 | AT3G60420 |
|                    | AT4G06744            | AT2G29420 | AT4G01870 | AT2G29440 |
|                    | AT3G56400            | AT4G36990 | AT4G15530 | AT2G24850 |
|                    | AT3G15356            | AT2G41231 | AT2G45570 | AT5G19240 |
|                    | AT1G62300            | AT2G43620 | AT4G02520 | AT2G24100 |
|                    | AT3G01290            | AT1G15520 | AT3G55970 | AT3G47340 |
|                    | AT5G52310            | AT5G42530 | AT2G39200 | AT5G63790 |
|                    | AT3G17609            | AT1G02850 |           |           |



**Supplemental Table 5. Differential-expressed genes co-regulated by AtD14-SMXL7**

| Up-regulated genes in both of <i>SMXL7-D</i> and <i>AtD14-I</i> | Down-regulated genes in both of <i>SMXL7-D</i> and <i>AtD14-I</i> |           | Down-regulated genes in <i>AtD14-I</i> But up-regulated in <i>SMXL7-D</i> |
|-----------------------------------------------------------------|-------------------------------------------------------------------|-----------|---------------------------------------------------------------------------|
| AT1G57750                                                       | AT1G77760                                                         | AT3G50480 | AT5G50200                                                                 |
| AT4G04955                                                       | AT1G64900                                                         | AT2G46680 | AT3G24420                                                                 |
| AT4G17860                                                       | AT4G19700                                                         | AT4G23170 | AT2G02010                                                                 |
| AT4G08950                                                       | AT4G27830                                                         | AT4G21380 | AT2G44080                                                                 |
| AT1G22160                                                       | AT2G41090                                                         | AT1G73480 | AT4G17500                                                                 |
| AT1G68600                                                       | AT3G51430                                                         | AT1G31580 | AT1G76680                                                                 |
| AT3G19680                                                       | AT5G54510                                                         | AT3G49120 | AT1G73500                                                                 |
| AT4G39800                                                       | AT5G36160                                                         | AT5G24530 | AT2G37040                                                                 |
| AT1G78020                                                       | AT1G44350                                                         | AT2G29340 |                                                                           |
| AT1G06350                                                       | AT1G50420                                                         | AT4G15490 |                                                                           |
| AT1G01120                                                       | AT1G45145                                                         | AT1G76590 |                                                                           |
| AT3G58120                                                       | AT4G27560                                                         | AT5G61820 |                                                                           |
| AT1G29660                                                       | AT4G37410                                                         | AT4G32480 |                                                                           |
| AT1G22530                                                       | AT1G69730                                                         | AT4G23600 |                                                                           |
| AT5G44680                                                       | AT1G49750                                                         | AT5G60900 |                                                                           |
| AT1G55330                                                       | AT2G47800                                                         | AT5G10760 |                                                                           |
| AT4G18970                                                       | AT3G05650                                                         | AT5G15970 |                                                                           |
|                                                                 | AT3G50950                                                         | AT1G73805 |                                                                           |
|                                                                 | AT4G34000                                                         | AT4G14400 |                                                                           |
|                                                                 | AT4G16690                                                         | AT5G17760 |                                                                           |
|                                                                 | AT2G23200                                                         | AT1G35910 |                                                                           |
|                                                                 | AT5G14780                                                         | AT1G52890 |                                                                           |
|                                                                 | AT2G38530                                                         | AT2G20670 |                                                                           |
|                                                                 | AT1G58340                                                         | AT2G40750 |                                                                           |
|                                                                 | AT1G49500                                                         | AT1G66760 |                                                                           |
|                                                                 | AT2G05380                                                         | AT2G41510 |                                                                           |
|                                                                 | AT1G69490                                                         | AT3G12220 |                                                                           |
|                                                                 | AT4G37540                                                         | AT5G42530 |                                                                           |
|                                                                 | AT1G17830                                                         | AT2G42540 |                                                                           |
|                                                                 | AT5G19120                                                         | AT2G36270 |                                                                           |
|                                                                 | AT1G02850                                                         | AT3G23120 |                                                                           |
|                                                                 | AT2G33380                                                         | AT2G46430 |                                                                           |
|                                                                 | AT5G52310                                                         | AT2G18050 |                                                                           |
|                                                                 | AT4G34710                                                         | AT1G16850 |                                                                           |
|                                                                 | AT3G05660                                                         | AT4G02280 |                                                                           |
|                                                                 | AT4G08870                                                         | AT5G66700 |                                                                           |
|                                                                 | AT1G21310                                                         | AT5G13370 |                                                                           |
|                                                                 | AT2G44290                                                         | AT3G25620 |                                                                           |
|                                                                 | AT4G37180                                                         | AT3G47340 |                                                                           |
|                                                                 | AT5G59220                                                         | AT2G25510 |                                                                           |
|                                                                 | AT1G03400                                                         | AT4G36850 |                                                                           |
|                                                                 | AT2G39710                                                         | AT3G14440 |                                                                           |
|                                                                 | AT2G37760                                                         | AT4G36740 |                                                                           |
|                                                                 | AT2G46440                                                         | AT1G62940 |                                                                           |
|                                                                 | AT2G24850                                                         | AT3G18550 |                                                                           |
|                                                                 | AT2G31083                                                         |           |                                                                           |

**Supplemental Table 6. Differential-expressed genes regulated by BRC1**

| Up-regulated genes in <i>brc1</i> (VS Col-0) | Down-regulated genes in <i>brc1</i> (VS Col-0) |
|----------------------------------------------|------------------------------------------------|
| AT1G62180                                    | AT2G14560                                      |
| AT1G04770                                    | AT3G57260                                      |
| AT5G15120                                    | AT2G18550                                      |
| AT4G08950                                    | AT3G20810                                      |
| AT3G02550                                    | AT4G36740                                      |
| AT3G03270                                    | AT5G60900                                      |
| AT1G05680                                    | AT3G14620                                      |
| AT1G58370                                    | AT1G72910                                      |
| AT1G72430                                    | AT4G14400                                      |
| AT5G64120                                    | AT3G12220                                      |
| AT3G27220                                    | AT5G10760                                      |
| AT4G25100                                    | AT2G24850                                      |
| AT5G39580                                    | AT2G25510                                      |
| AT2G38240                                    | AT3G14440                                      |
| AT4G24110                                    | AT5G52760                                      |
| AT3G20395                                    | AT2G40080                                      |
| AT2G19800                                    | AT3G48650                                      |
| AT2G02990                                    | AT2G46430                                      |
| AT5G39890                                    | AT1G52100                                      |
| AT3G10040                                    | AT3G19710                                      |
| AT2G16060                                    | AT3G23120                                      |
| AT4G10265                                    | AT3G25620                                      |
| AT1G43800                                    | AT2G32160                                      |
| AT4G33560                                    | AT5G42900                                      |
| AT4G33070                                    | AT1G21250                                      |
| AT4G39675                                    | AT1G16410                                      |
|                                              | AT3G50470                                      |
|                                              | AT1G35710                                      |
|                                              | AT3G60420                                      |
|                                              | AT5G66700                                      |
|                                              | AT4G02280                                      |
|                                              | AT5G64110                                      |
|                                              | AT1G73805                                      |
|                                              | AT4G14365                                      |
|                                              | AT2G47130                                      |
|                                              | AT5G24210                                      |
|                                              | AT4G23170                                      |
|                                              | AT2G46440                                      |
|                                              | AT3G26210                                      |
|                                              | AT3G50480                                      |
|                                              | AT2G43570                                      |
|                                              | AT4G33980                                      |
|                                              | AT5G42530                                      |
|                                              | AT1G31580                                      |
|                                              | AT3G19200                                      |
|                                              | AT1G45145                                      |
|                                              | AT1G69490                                      |
|                                              | AT5G57340                                      |
|                                              | AT3G09260                                      |
|                                              | AT2G46680                                      |
|                                              | AT4G22505                                      |
|                                              | AT5G24530                                      |
|                                              | AT5G17760                                      |
|                                              | AT5G59670                                      |
|                                              | AT2G14610                                      |
|                                              | AT2G47770                                      |
|                                              | AT3G17520                                      |
|                                              | AT5G16920                                      |



**Supplemental Table 7. Primers for genotyping, CHIP, EMSA, qPCR and recombinant vectors.**

| Name                       | sequences 5'-3'                         |
|----------------------------|-----------------------------------------|
| <i>smx16</i> -LP           | AGCCAGAGAAAGACTCGAACC                   |
| <i>smx16</i> -RP           | TCAGATCCGAATCGTGAGTTC                   |
| <i>smx17</i> -LP           | CGTATTAGCCTCTCGGATTCC                   |
| <i>smx17</i> -RP           | GATCAAGAAACGAACGCTGAG                   |
| <i>smx18</i> -LP           | TAGCGAAACAATGCTTAACGG                   |
| <i>smx18</i> -RP           | TGGTGAGTAACTGCAAATCCC                   |
| <i>max2-1</i> -LP          | TACATGCAAGCATGCAACTTC                   |
| <i>max2-1</i> -RP          | AATAGGAACAAAATCGCCACC                   |
| LBP1.3                     | ATTTTGCCGATTTTCGGAAC                    |
| ChIP- <i>BRC1</i> pro-F1-F | ACGTAAGAAAAAGGAGCTACCC                  |
| ChIP- <i>BRC1</i> pro-F1-R | CATCAATCATGGCGATCCCTC                   |
| ChIP- <i>BRC1</i> pro-F2-F | CTTGAGGGATCGCCATGATTG                   |
| ChIP- <i>BRC1</i> pro-F2-R | TGATTTGCATTTACCGTAAG                    |
| ChIP- <i>BRC1</i> pro-F3-F | TGACCTTAGTTCTTTCTTACGGTGA               |
| ChIP- <i>BRC1</i> pro-F3-R | AGCATGCACTAAAAGATGCCTAAA                |
| ChIP- <i>BRC1</i> pro-F4-F | TTTAGGCATCTTTTAGTGATGCT                 |
| ChIP- <i>BRC1</i> pro-F4-R | ACAACACAGGCGACGTAATT                    |
| ChIP- <i>BRC1</i> pro-F5-F | AAGTACGTCGCTGTGTGT                      |
| ChIP- <i>BRC1</i> pro-F5-R | TGTTTCATGCCTTTTTAGGGGT                  |
| <i>BRC1</i> -pro-probe a-F | GAACAAATGCAATATATCAATAGTTAGTGACATATGAAG |
| <i>BRC1</i> -pro-probe a-R | CTTCATATGTACTACTAATTGATATATTGCATTTGTTT  |
| <i>BRC1</i> -pro-probe b-F | AACATAAACAAACACAAGGTCTAATTATAGAAAAAATC  |
| <i>BRC1</i> -pro-probe b-R | GATTTTTTCTATAATTAGGACCTTGTGTTTGTATTGTT  |
| <i>BRC1</i> -pro-probe c-F | AAGAAGATTATAGTACAAGTGTCATTCTCAAAATTTTGT |
| <i>BRC1</i> -pro-probe c-R | GACAAAATTTGAGAATGACACTGTACTATAATCTTCTT  |
| <i>BRC1</i> -qPCR-F        | GGAAACAAGGTCGATGGGAGA                   |
| <i>BRC1</i> -qPCR-R        | TTTAAAATGGGCGTTCGCGG                    |
| <i>BES1</i> -qPCR-F        | GGCTACTATACCTGAATGTG                    |
| <i>BES1</i> -qPCR-R        | AGAGAATGGCTGTTGTTG                      |
| U-BOX-F                    | TCTTCTTCTGCTACATCTACTCTC                |
| U-BOX-R                    | AGTGTGTGAACCCGTGAAC                     |
| <i>ACT2</i> -F             | TGCTGTTGACTACGAGCAGG                    |
| <i>ACT2</i> -R             | TCCATTTCCACAAACGAGGG                    |
| ChIP- <i>DWF4</i> pro-F    | GACAATGCCAAAAGTCTACGGG                  |
| ChIP- <i>DWF4</i> pro-R    | GGAGCTAGTTTCTCTCTCTCTC                  |
| <i>BES1</i> -F             | ATGACGTCTGACGGAGCAAC                    |
| <i>BES1</i> -R             | ACTATGAGCTTTACCATTTC                    |
| <i>BES1</i> -L-F           | ATGAAAAGATTCTTCTATAATTCCAGC             |
| <i>BES1</i> pro -F         | ATATTAGTATCACTATTCTGCTATTCACTAG         |
| Overlapping-bes1-D-F       | CCTGGCTACTAT ACCTG                      |
| Overlapping-bes1-D-R       | CAGGTATAGTAGCCAGG                       |

|                                   |                                          |
|-----------------------------------|------------------------------------------|
| <i>SMXL6-F</i>                    | ATGCCGACGCCGGTGACTACGG                   |
| <i>SMXL6-R</i>                    | CCATATCACATCCACC                         |
| <i>SMXL7-F</i>                    | ATGCCGACACCAGTAACC                       |
| <i>SMXL7-R</i>                    | GATCACTTCGACTCTC                         |
| <i>SMXL8-F</i>                    | ATGCCAACGGCGGTGAAT                       |
| <i>SMXL8-R</i>                    | CTACTGAGATTTTACAAA                       |
| <i>SMXL7pro-F</i>                 | TCTACTGTGCATCAAGACAT                     |
| overlapping- <i>SMXL7-D-F2</i>    | CAGATTGTCTGAGGCTATGACACTCCGTGACTCGCATGGG |
| overlapping- <i>SMXL7-D-R2</i>    | CCCATGCGAGTCACGGAGTGTCATAGCCTCAGACAATCTG |
| overlapping- <i>SMXL7-mEAR-F2</i> | GCGTTCGTTTGCTGATGCAAATGCTCCTGTGGATGAG    |
| Overlapping- <i>SMXL7-mEAR-F2</i> | GCGTTCGTTTGCTGATGCAAATGCTCCTGTGGATGAG    |

---
